# Supplementary material for: Amidase and lysozyme dual functions in TseP reveal a new family of chimeric effectors in the type VI secretion system
Source: eLife journal article supplement (doi:10.7554/elife.101125), 2024-10-15
Supplement: fig1-data2 [file elife-101125-fig1-data2-v1.zip]

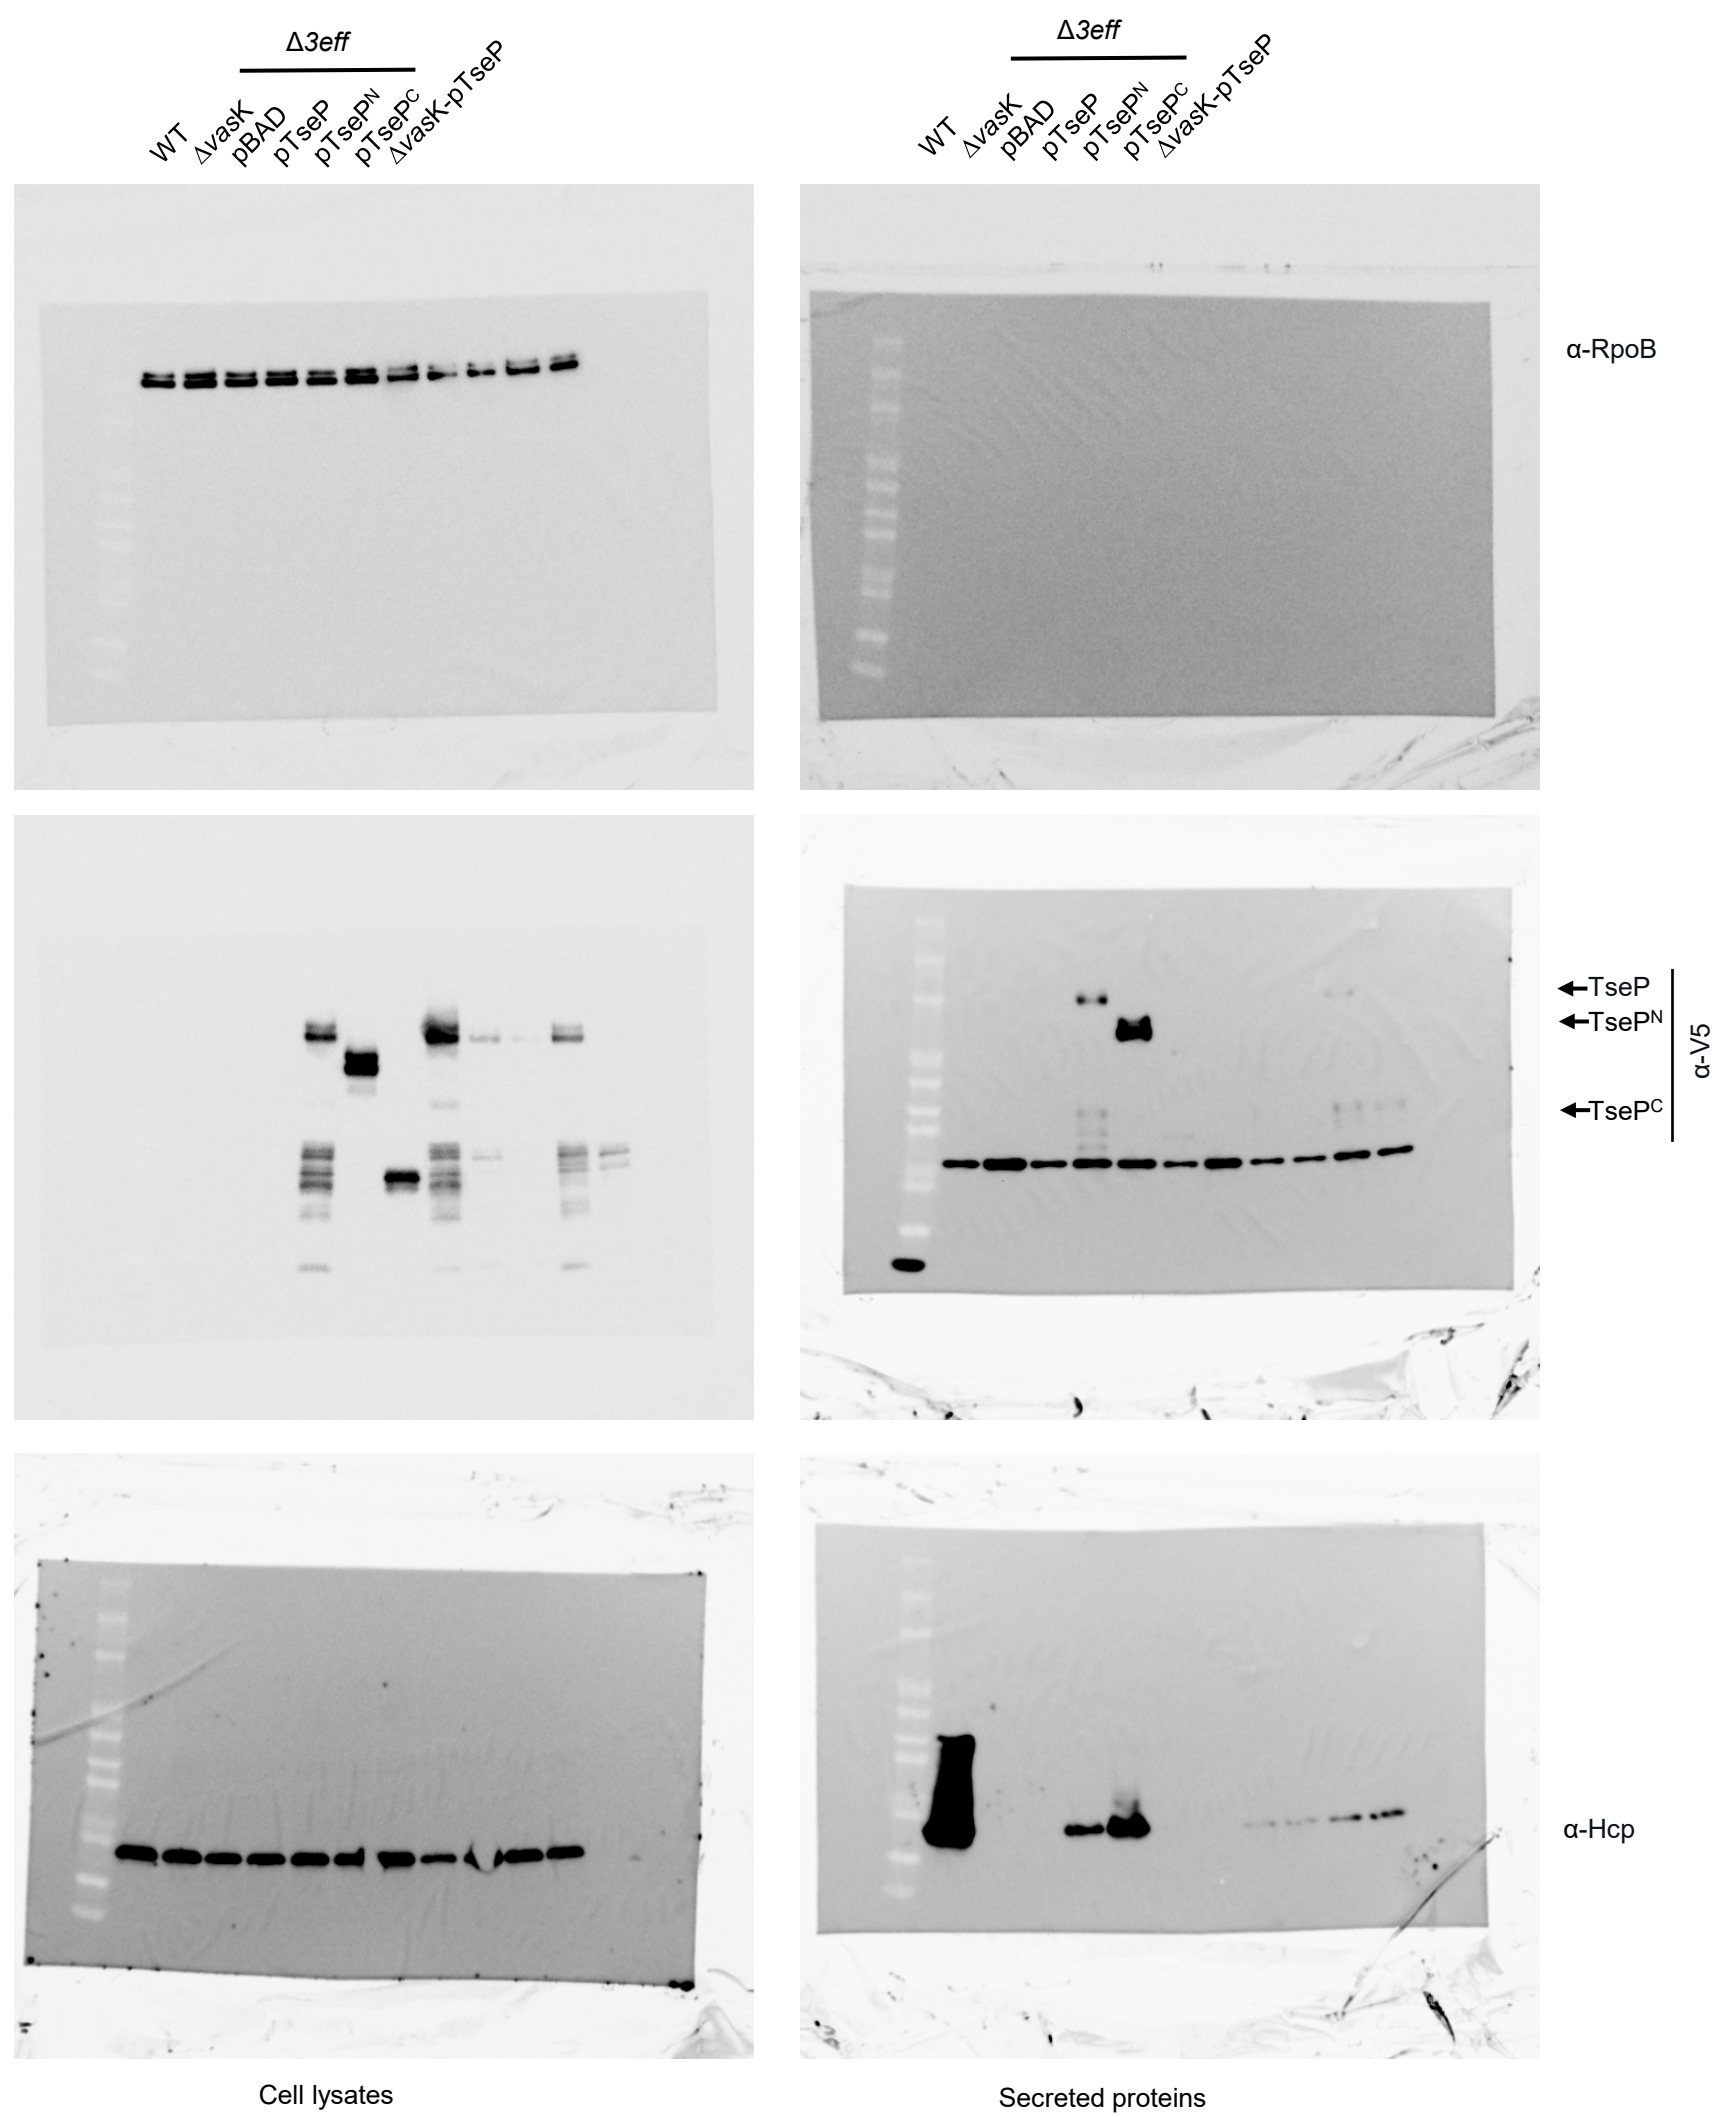

**Figure 1A,** Secretion analysis of TseP, TseP<sup>N</sup>, and TseP<sup>C</sup> in the SSU triple effector deletion mutant ( $\Delta 3eff$ ). A schematic of the TseP N-terminus (TseP<sup>N</sup>, 1-603 aa) and C-terminus (TseP<sup>C</sup>, 604-845 aa) is depicted at the top. Hcp serves as a positive control for T6SS secretion. Hcp, RpoB, and 3V5-tagged TseP proteins were detected using specific antibodies.

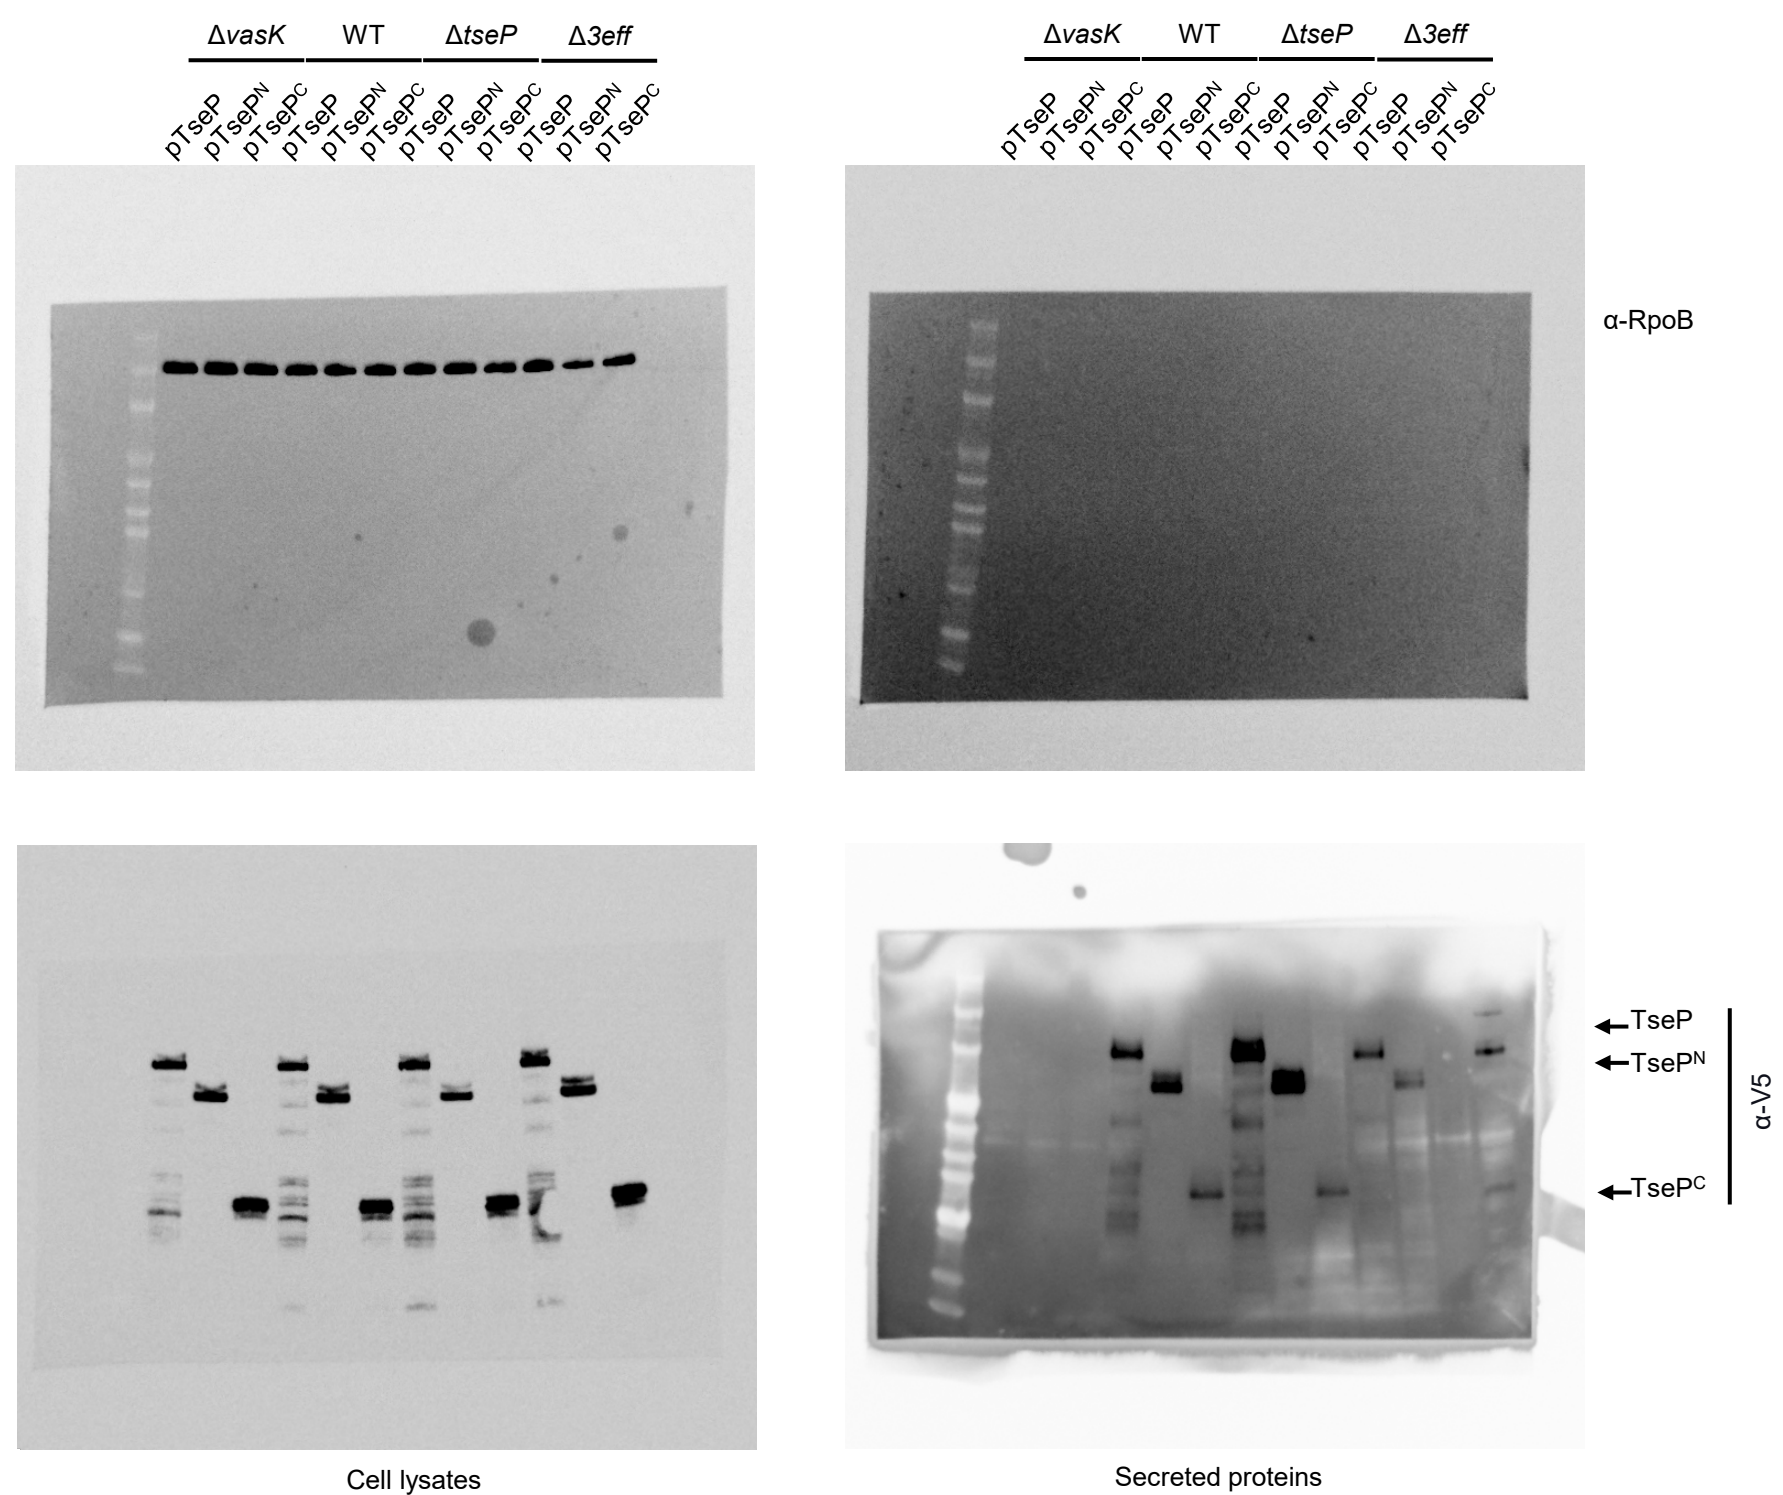

**Figure 1 D,** Secretion analysis of TseP, TseP<sup>N</sup>, and TseP<sup>C</sup> in SSU wild type,  $\Delta vasK$ ,  $\Delta tseP$ , and  $\Delta 3eff$  mutants. TseP, TseP<sup>N</sup>, and TseP<sup>C</sup> were tagged with a 3V5 C-terminal tag and expressed on pBAD vectors. RpoB serves as an equal loading and autolysis control.

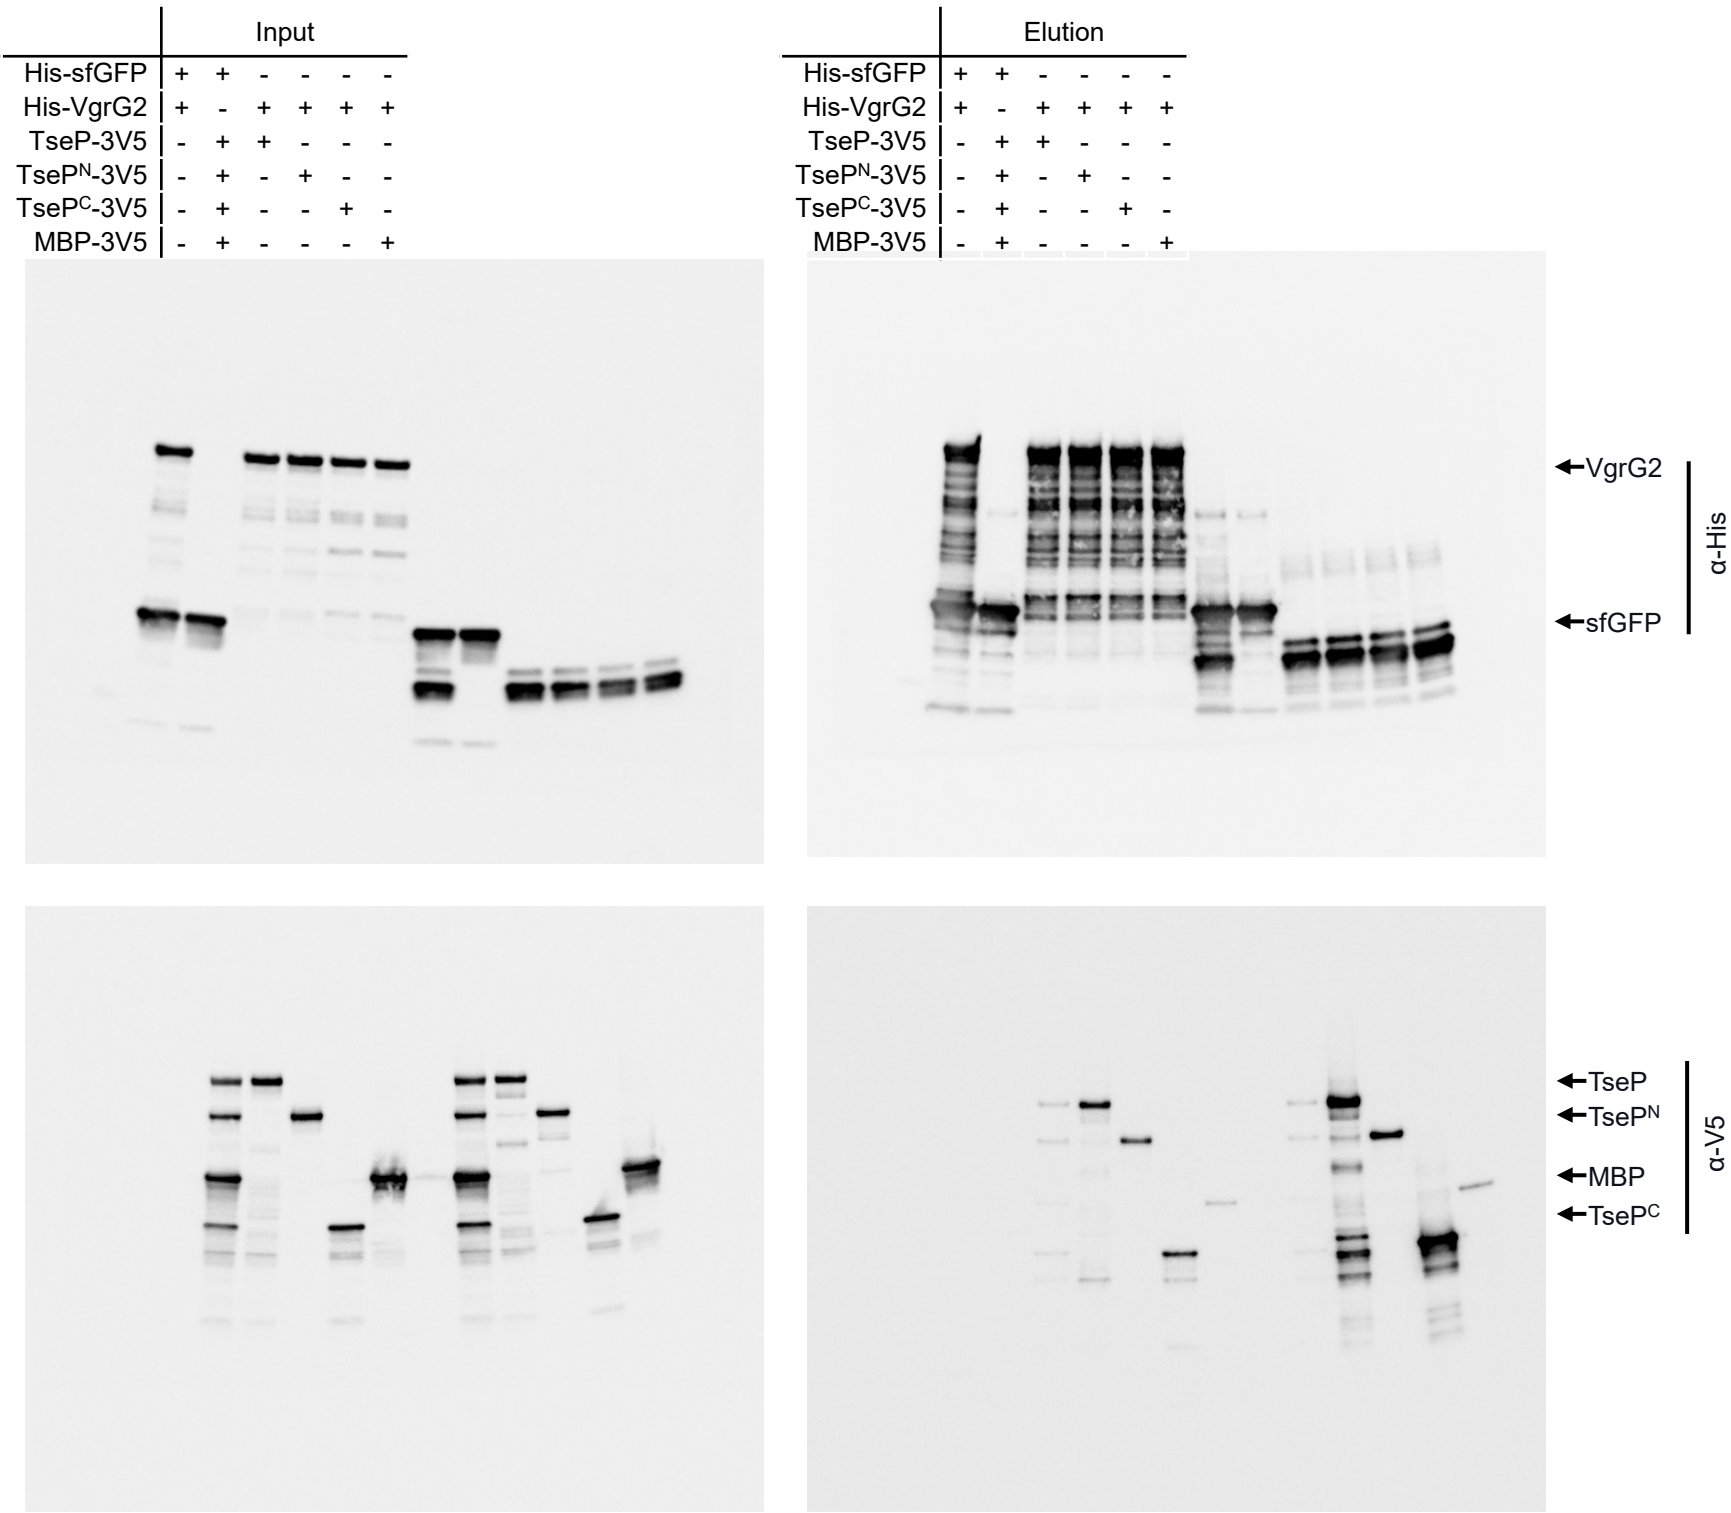

**Figure 1E**, Pull-down analysis of VgrG2 with TseP, TseP<sup>N</sup>, and TseP<sup>C</sup>. His-tagged VgrG2 and 3V5-tagged TseP, TseP<sup>N</sup>, or TseP<sup>C</sup> were used. His-tagged sfGFP and 3V5-tagged MBP were used as controls.
