# Supplementary material for: Amidase and lysozyme dual functions in TseP reveal a new family of chimeric effectors in the type VI secretion system
Source: eLife journal article supplement (doi:10.7554/elife.101125), 2024-10-15
Supplement: fig1-figsupp1-data2 [file elife-101125-fig1-figsupp1-data2-v1.zip]

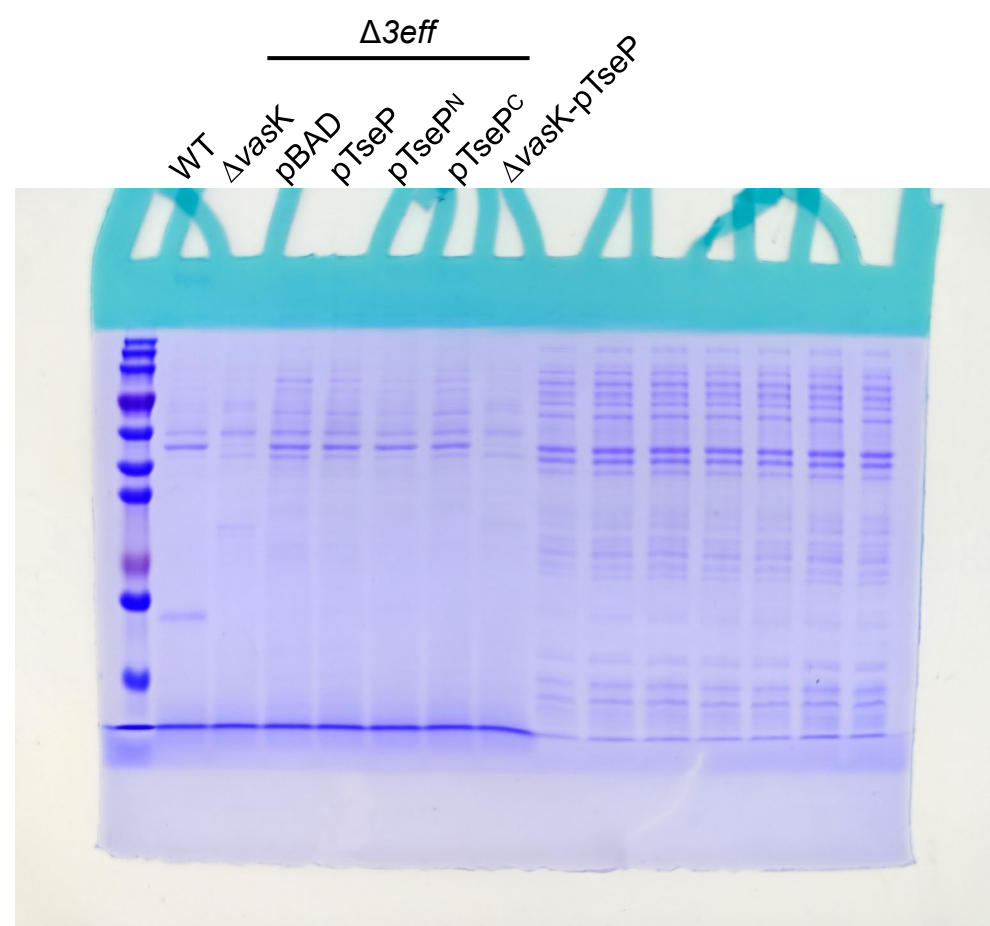

**Figure 1-figure supplement 1.** Staining SDS-PAGE of secretion of TseP, TseP<sup>N</sup>, and TseP<sup>C</sup> in the SSU triple effector deletion mutant ( $\Delta 3eff$ ). The secretion proteins were visualized by SDS-PAGE and stained with Coomassie brilliant blue dye.
