# Supplementary material for: Amidase and lysozyme dual functions in TseP reveal a new family of chimeric effectors in the type VI secretion system
Source: eLife journal article supplement (doi:10.7554/elife.101125), 2024-10-15
Supplement: fig2-data2 [file elife-101125-fig2-data2-v1.zip]

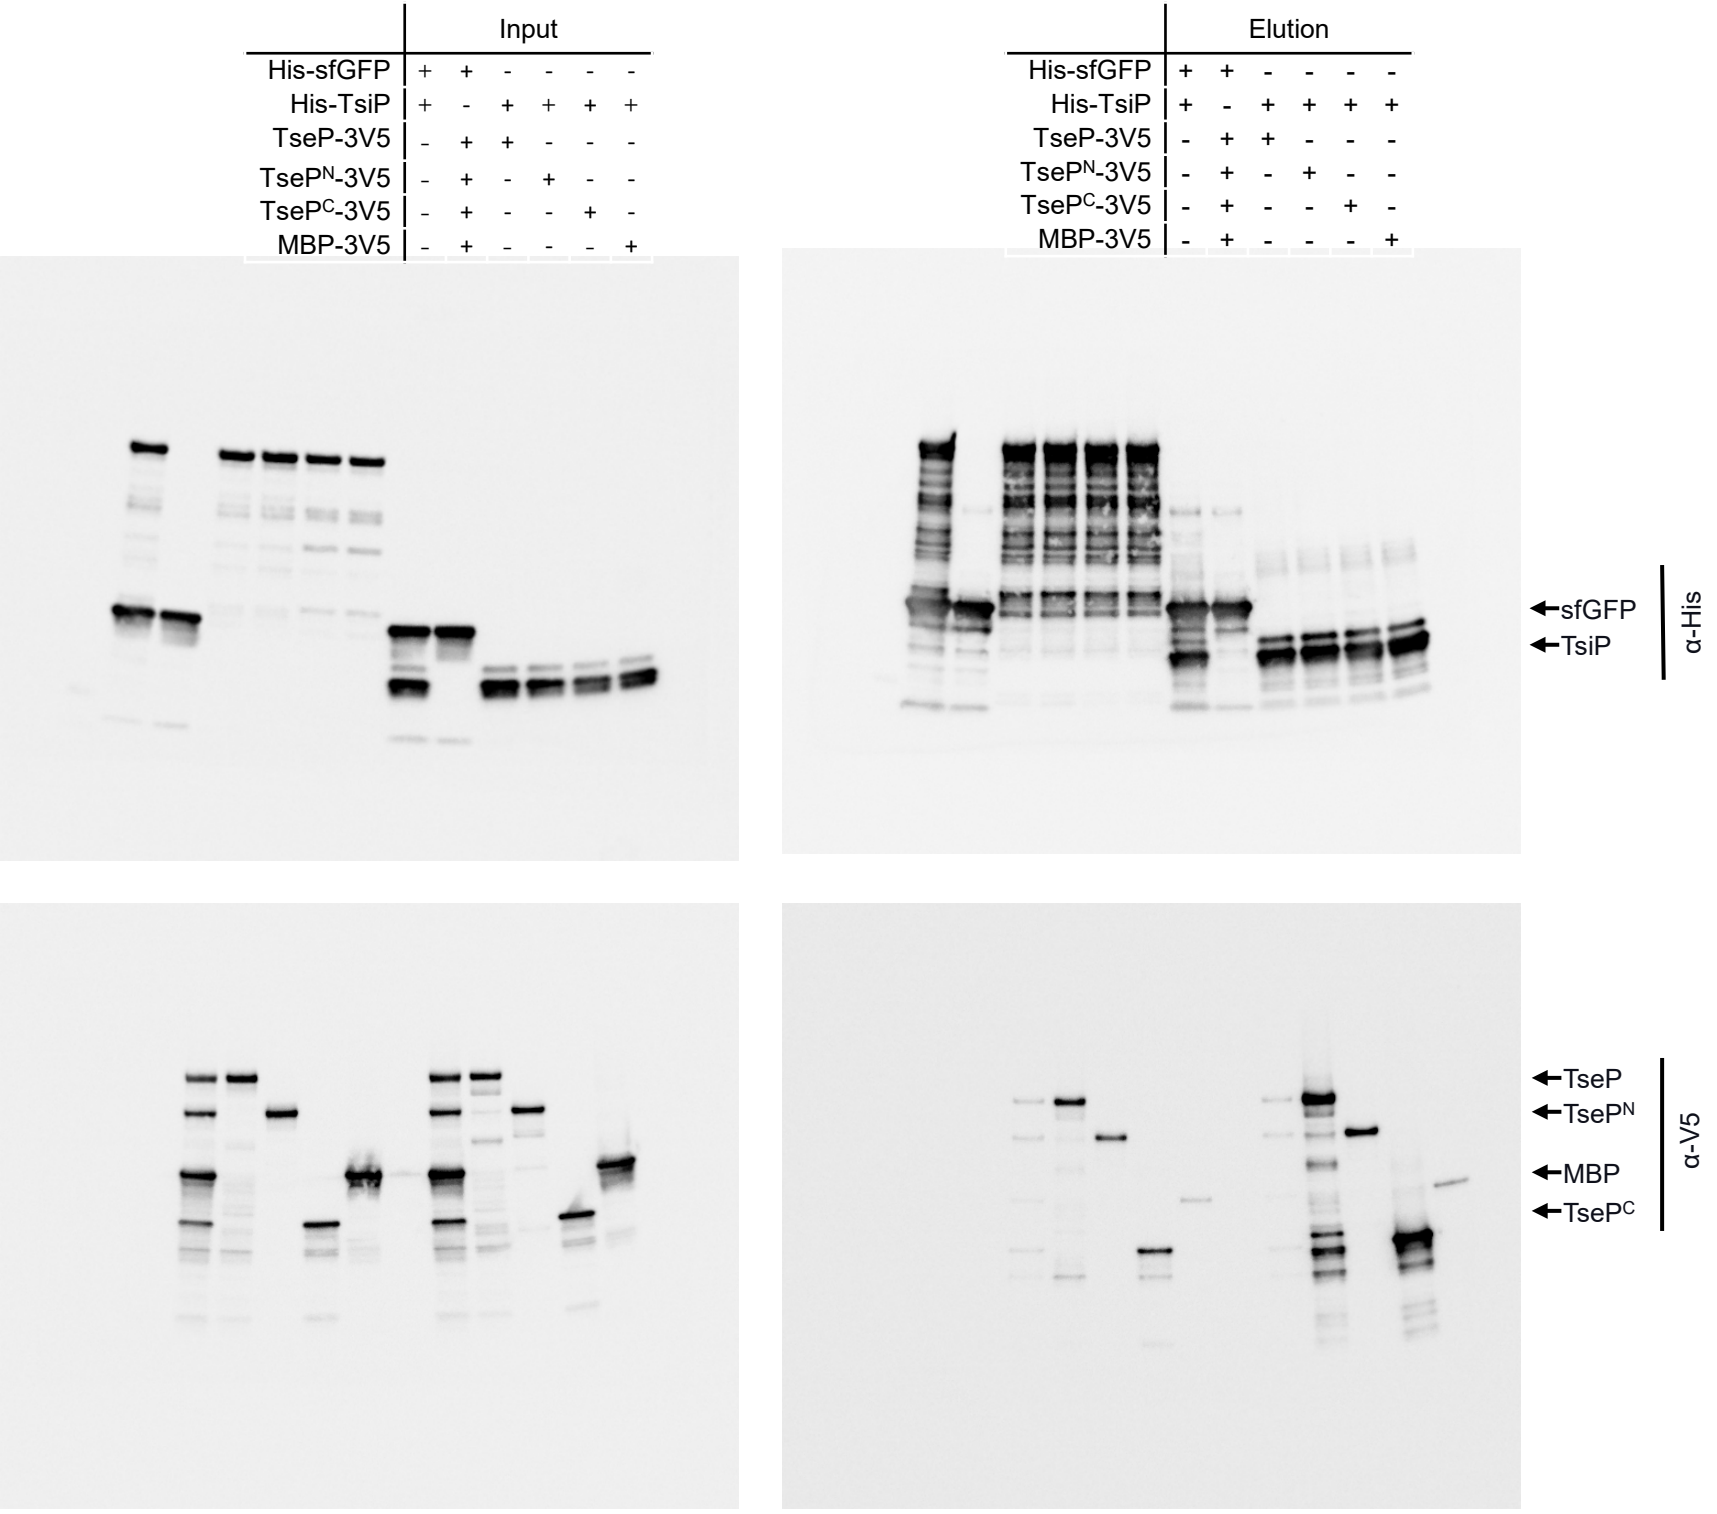

**Figure 2G,** Pull-down analysis of TsiP with TseP, TseP<sup>N</sup>, and TseP<sup>C</sup>. His-tagged TsiP and 3V5-tagged TseP, TseP<sup>N</sup>, or TseP<sup>C</sup> were used. His-tagged sfGFP and 3V5-tagged MBP were used as controls.
