# Supplementary material for: Amidase and lysozyme dual functions in TseP reveal a new family of chimeric effectors in the type VI secretion system
Source: eLife journal article supplement (doi:10.7554/elife.101125), 2024-10-15
Supplement: fig3-data2 [file elife-101125-fig3-data2-v1.zip]

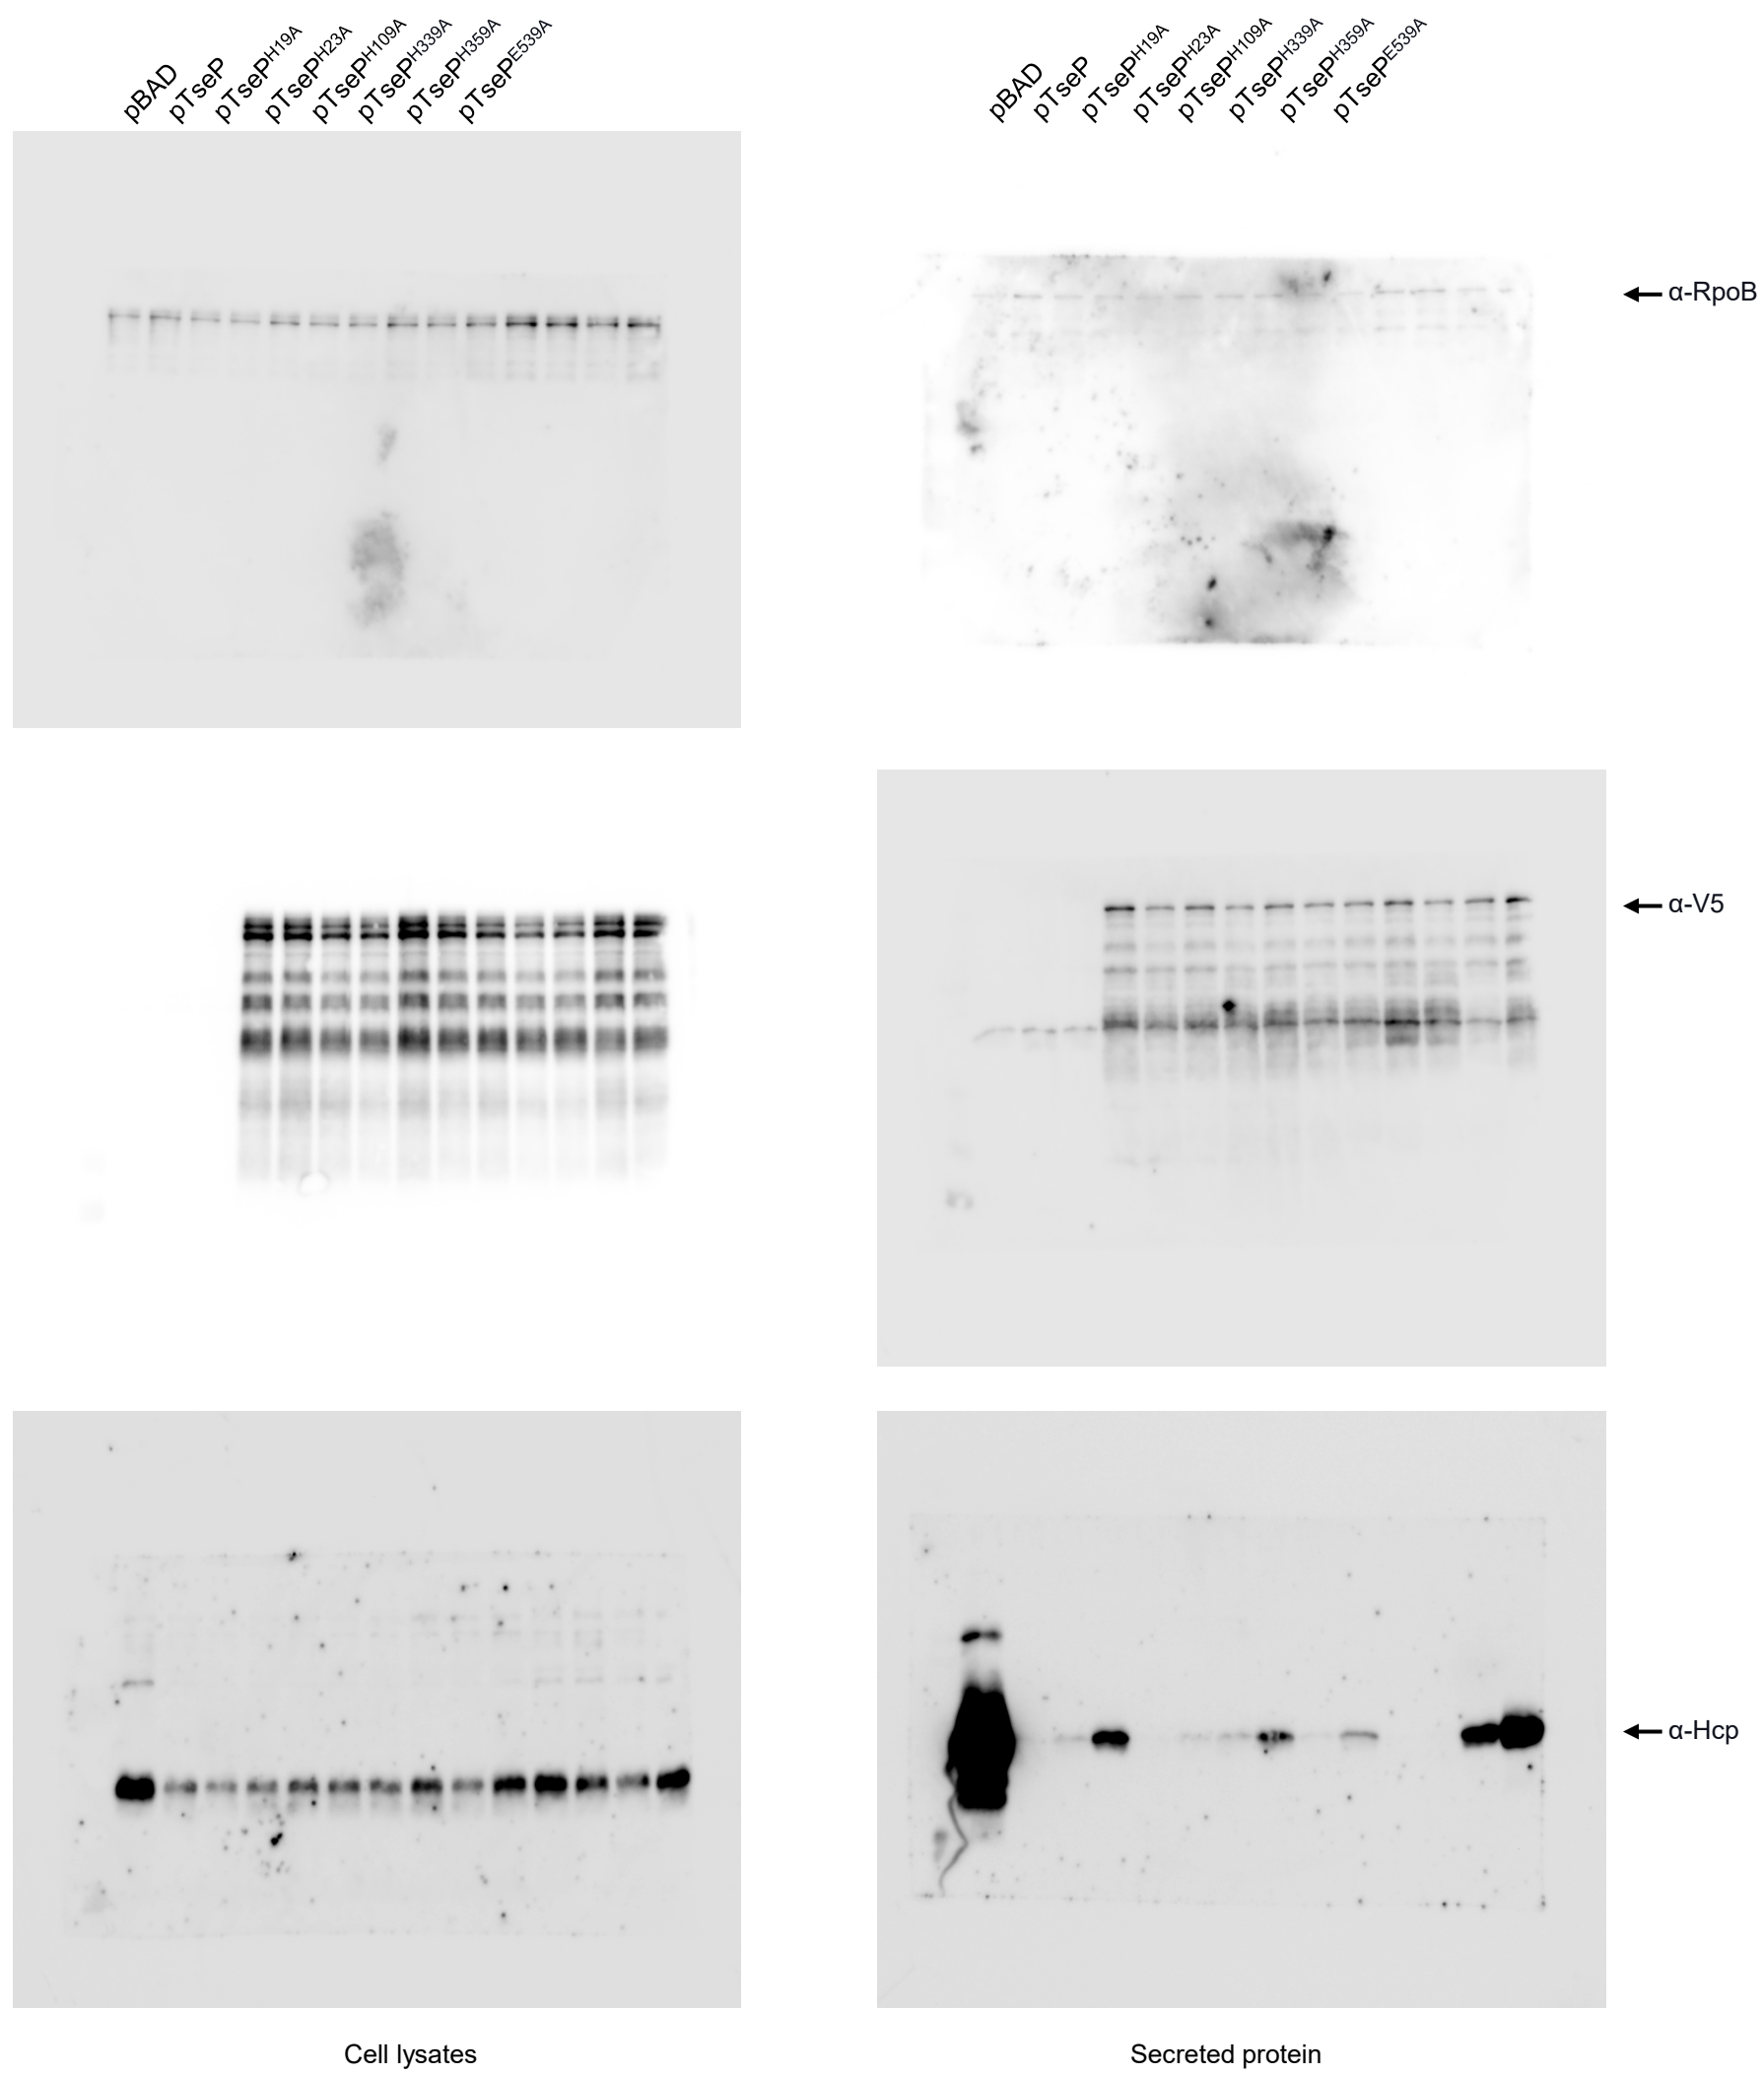

**Figure 3A**, Secretion analysis of Hcp in the  $\Delta 3eff$  mutant complemented with different TseP variants. RpoB serves as an equal loading and autolysis control. Hcp, RpoB, and 3V5-tagged TseP proteins were detected using specific antibodies.
