# Supplementary material for: Amidase and lysozyme dual functions in TseP reveal a new family of chimeric effectors in the type VI secretion system
Source: eLife journal article supplement (doi:10.7554/elife.101125), 2024-10-15
Supplement: fig6-data2 [file elife-101125-fig6-data2-v1.zip]

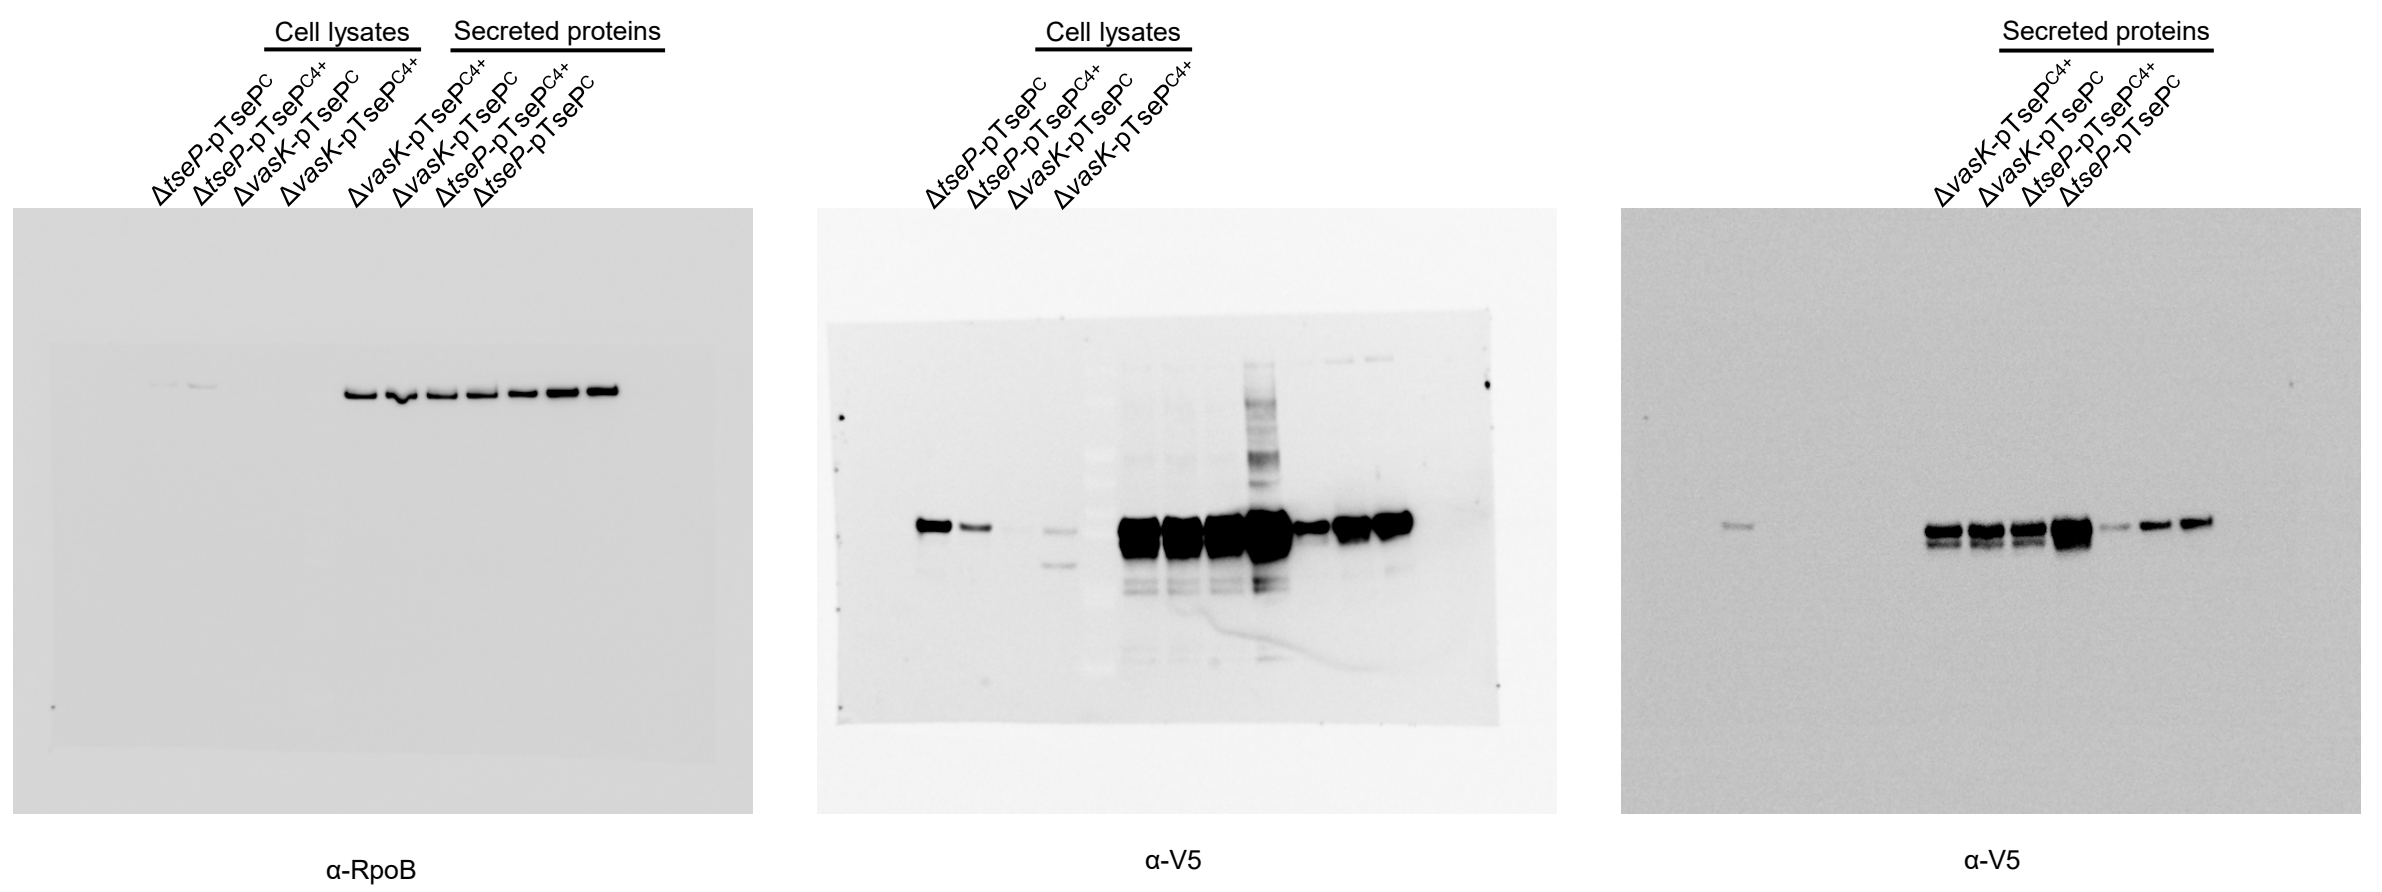

**Figure 6E**, Secretion analysis of TseP<sup>C</sup> and TseP<sup>C4+</sup> in the  $\Delta tseP$  mutant. RpoB serves as an equal loading and autolysis control. RpoB and 3V5-tagged TseP<sup>C</sup> proteins were detected using specific antibodies.
