# Supplementary material for: Amidase and lysozyme dual functions in TseP reveal a new family of chimeric effectors in the type VI secretion system
Source: eLife journal article supplement (doi:10.7554/elife.101125), 2024-10-15
Supplement: fig6-figsupp2-data2 [file elife-101125-fig6-figsupp2-data2-v1.zip]

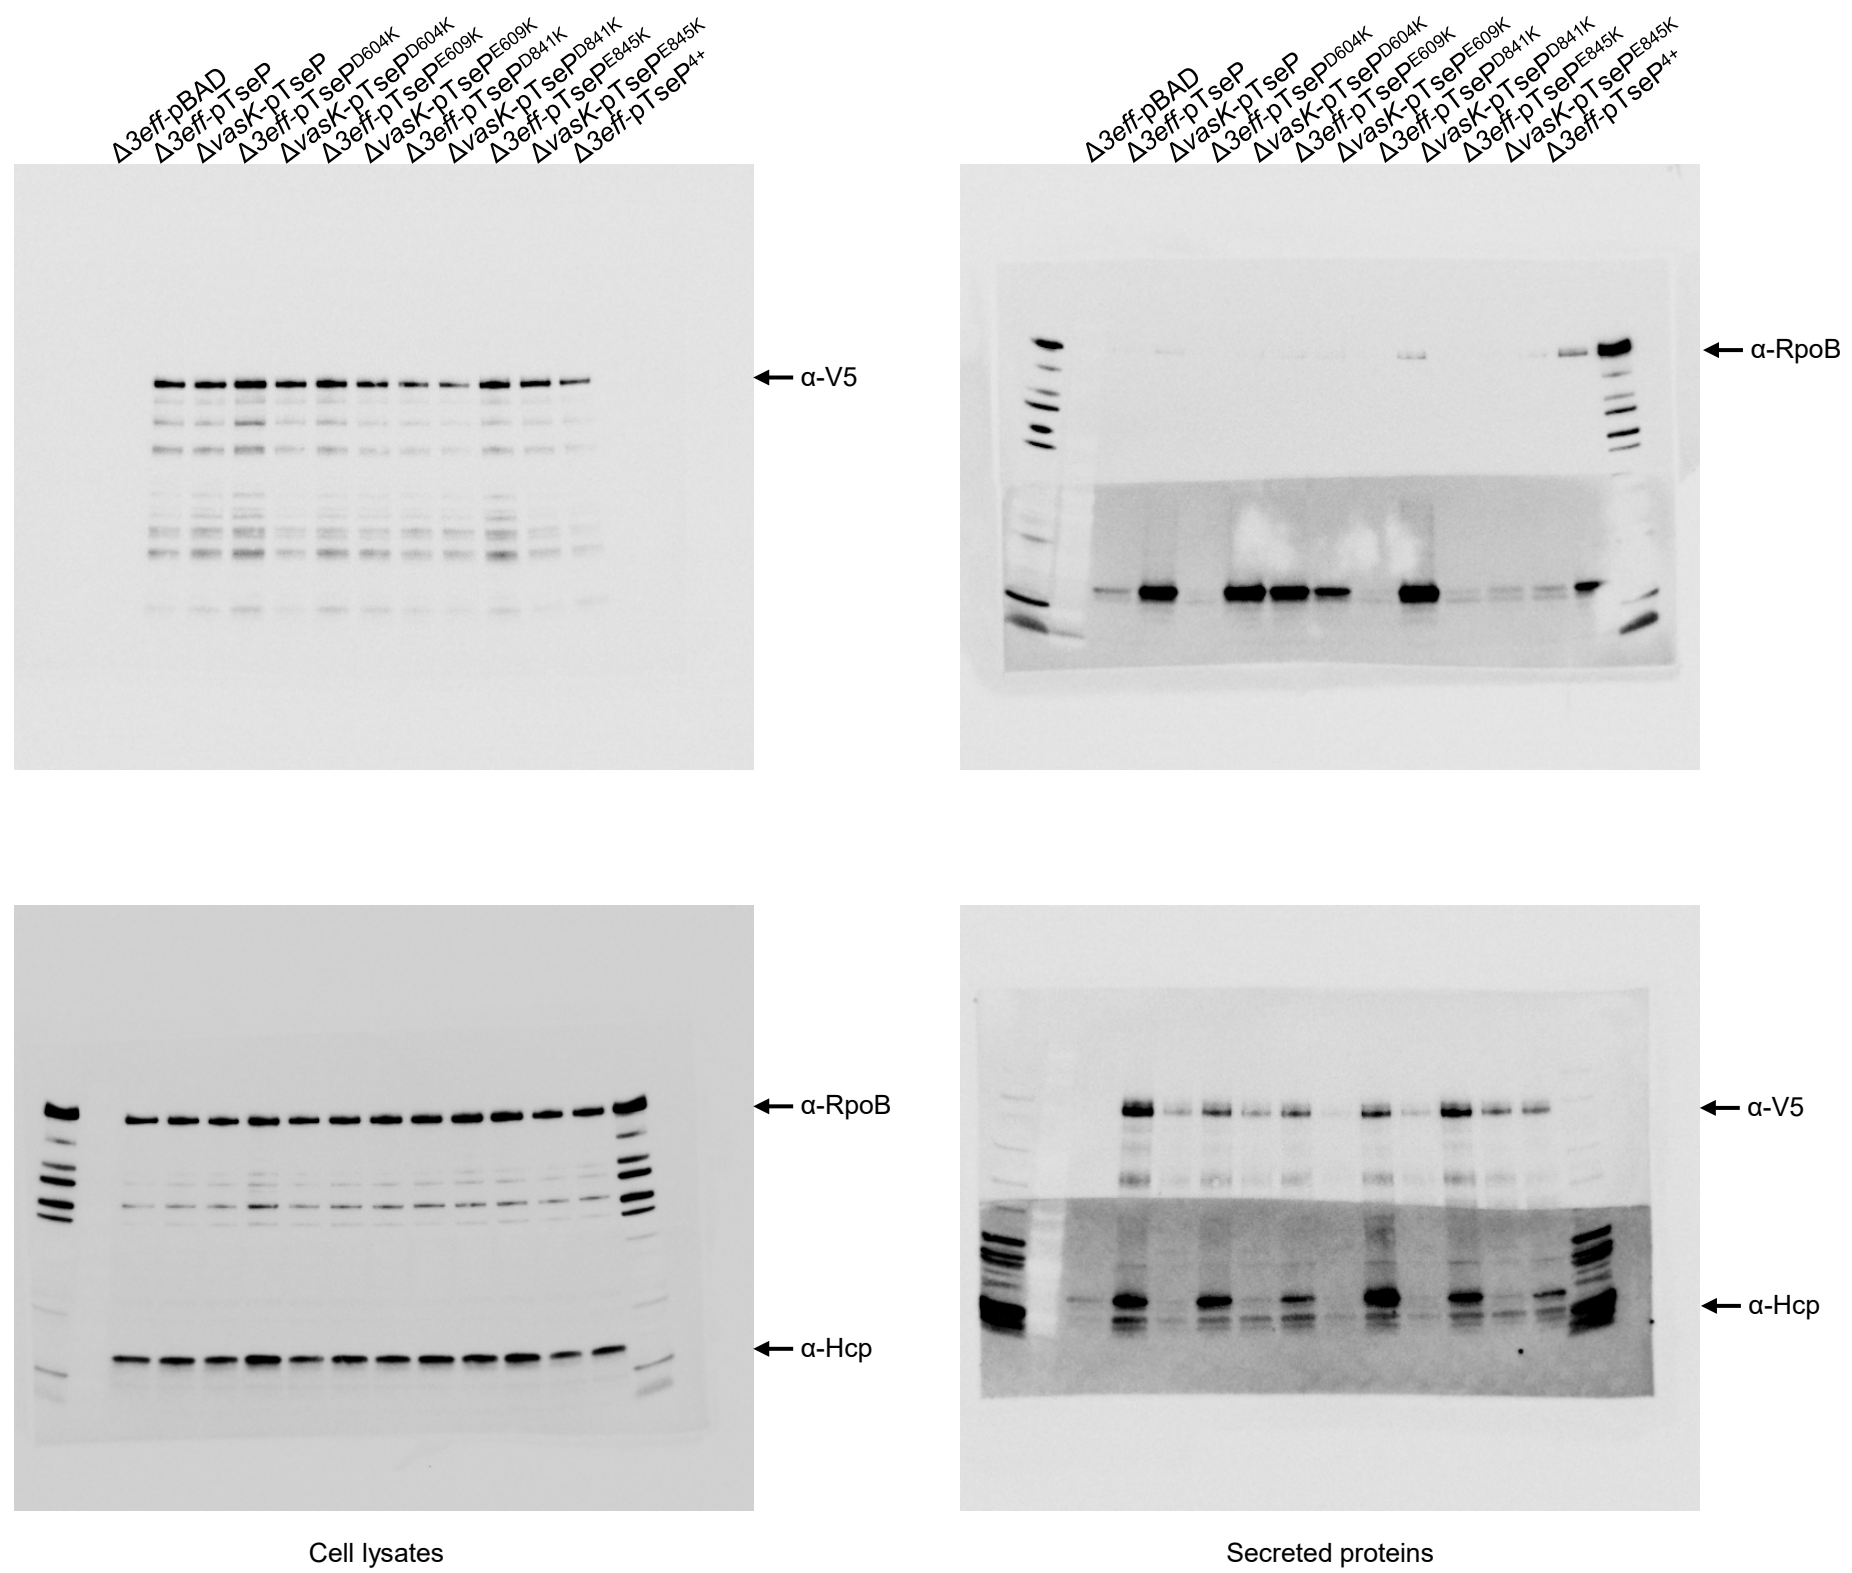

**Figure 7-figure supplement 2A**, Secretion analysis of Hcp in the  $\Delta 3eff$  mutant complemented with different TseP variants. RpoB serves as an equal loading and autolysis control. Hcp, RpoB, and 3V5-tagged TseP proteins were detected using specific antibodies.

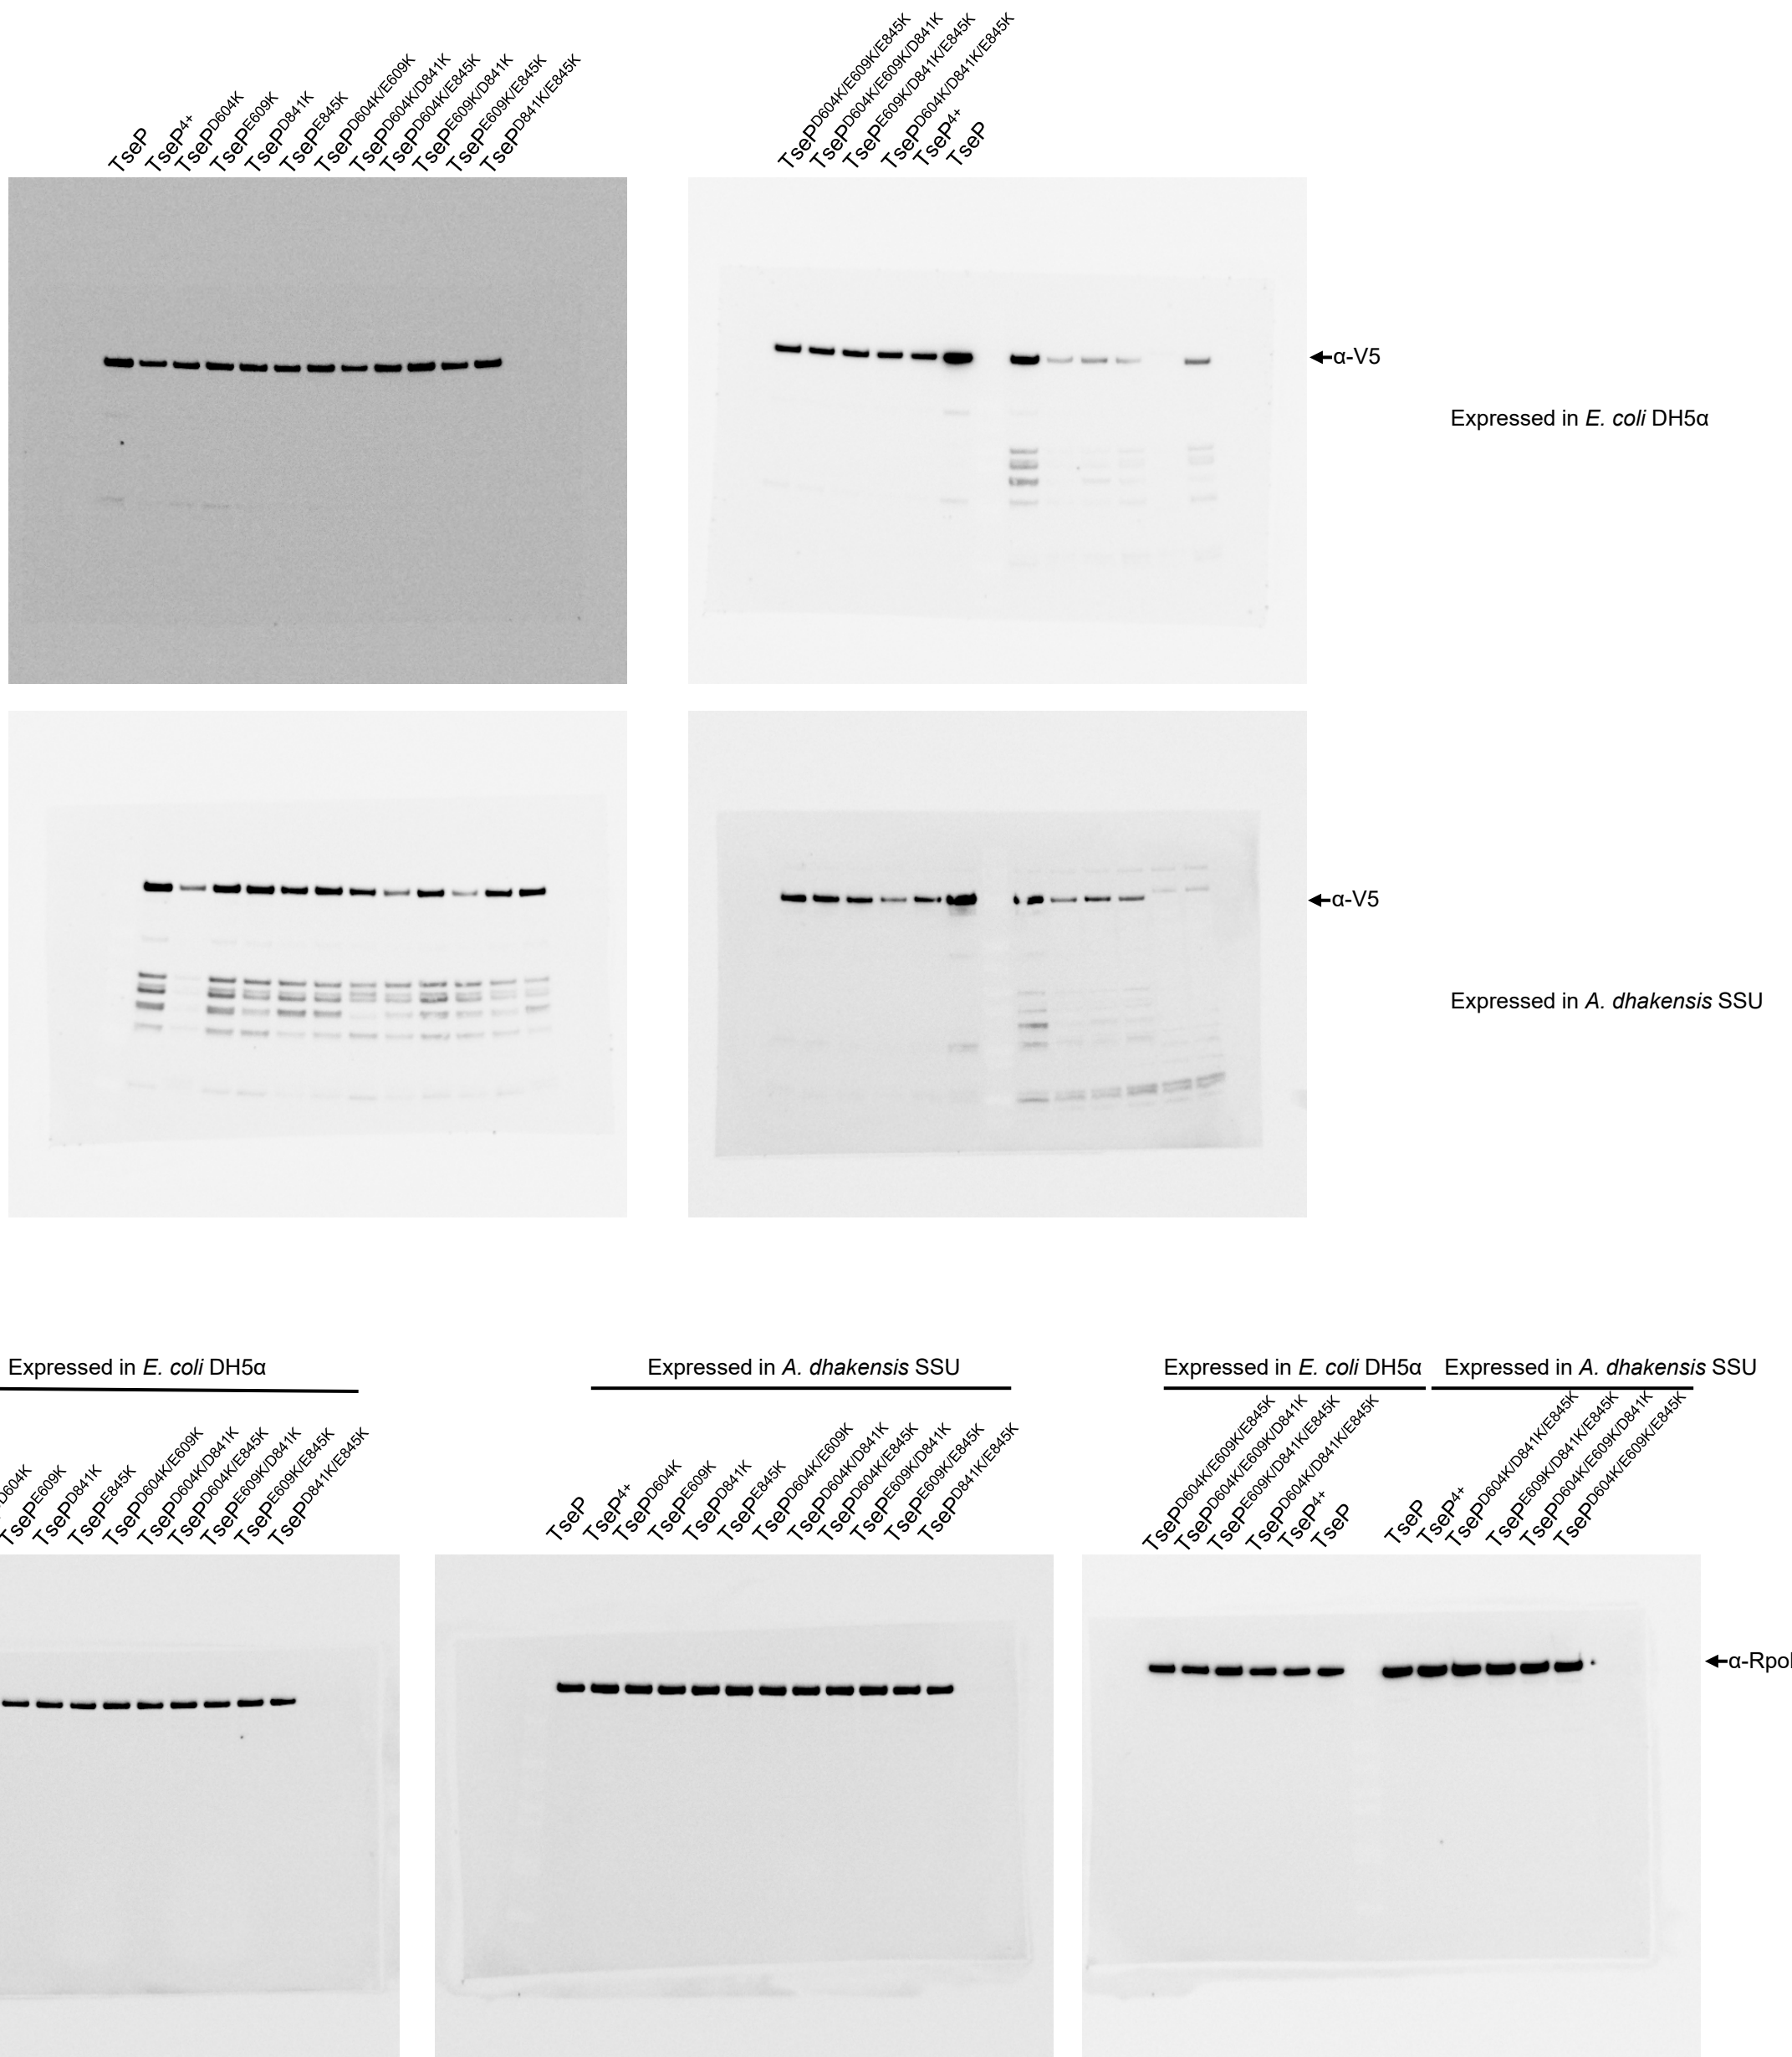

**Figure 7-figure supplement 2B**, Protein expression of TseP and its variants in *E. coli* and SSU strains. RpoB serves as an equal loading control. RpoB and 3V5-tagged TseP proteins were detected using specific antibodies.
