# Supplementary material for: Amidase and lysozyme dual functions in TseP reveal a new family of chimeric effectors in the type VI secretion system
Source: eLife journal article supplement (doi:10.7554/elife.101125), 2024-10-15
Supplement: fig6-figsupp3-data2 [file elife-101125-fig6-figsupp3-data2-v1.zip]

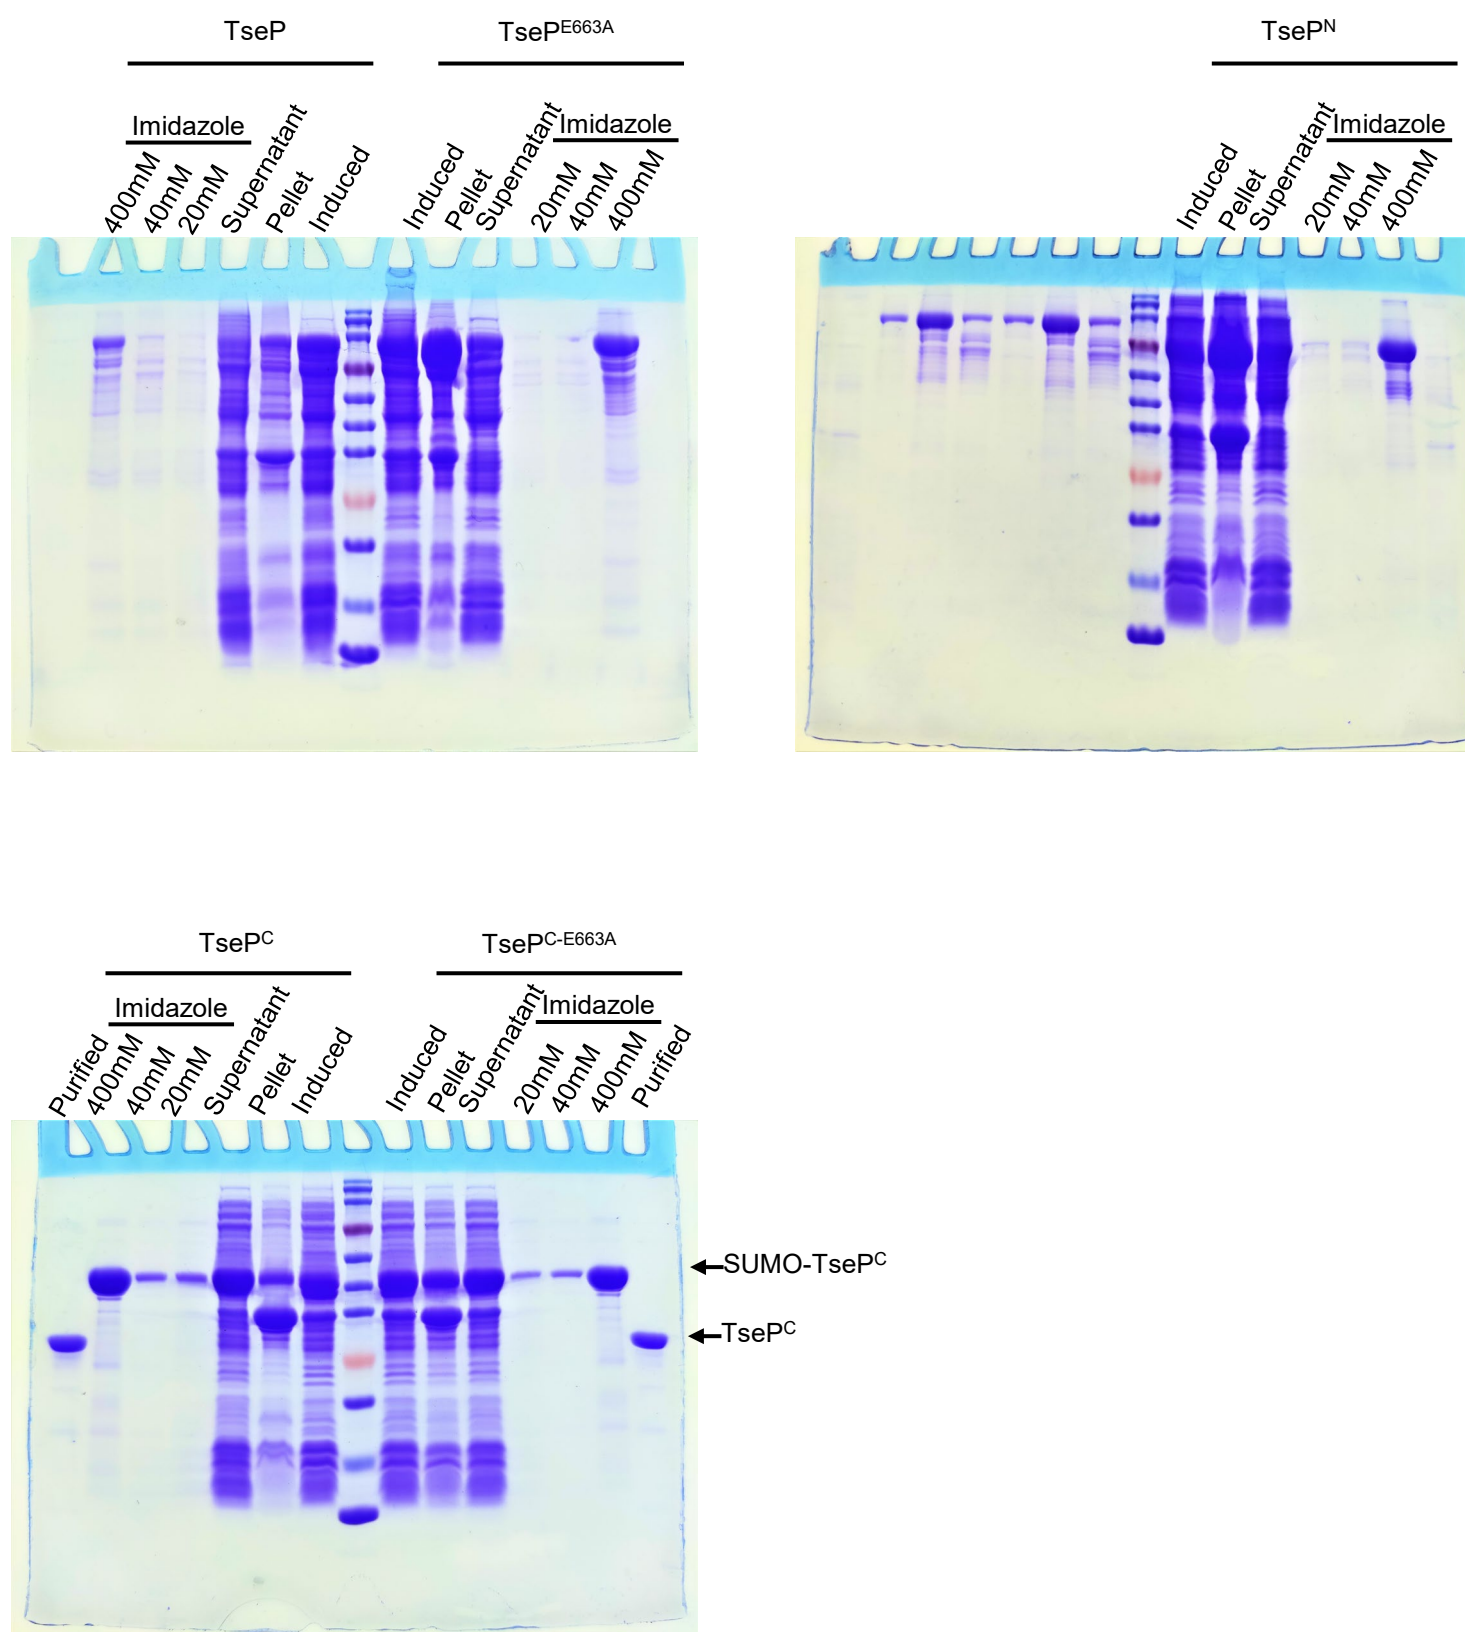

**Figure 7-figure supplement 3A,** Purification of His-TseP, His-TseP<sup>E663A</sup>, His-SUMO-TseP<sup>N</sup>, His-SUMO-TseP<sup>C</sup>, and His-SUMO-TseP<sup>C-E663A</sup>. The His-SUMO tag was removed by SUMO protease.

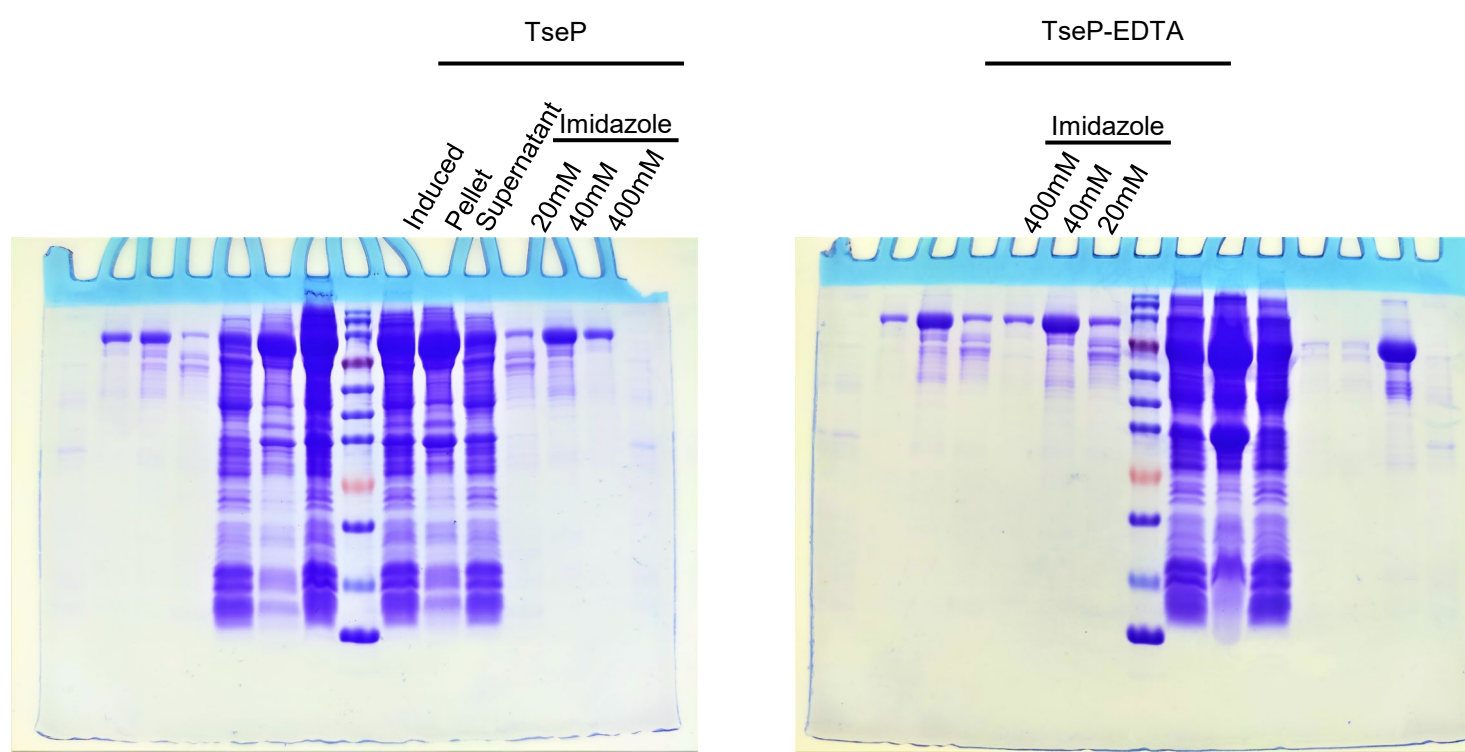

**Figure 7-figure supplement 3B,** Purification of TseP proteins with or without EDTA.

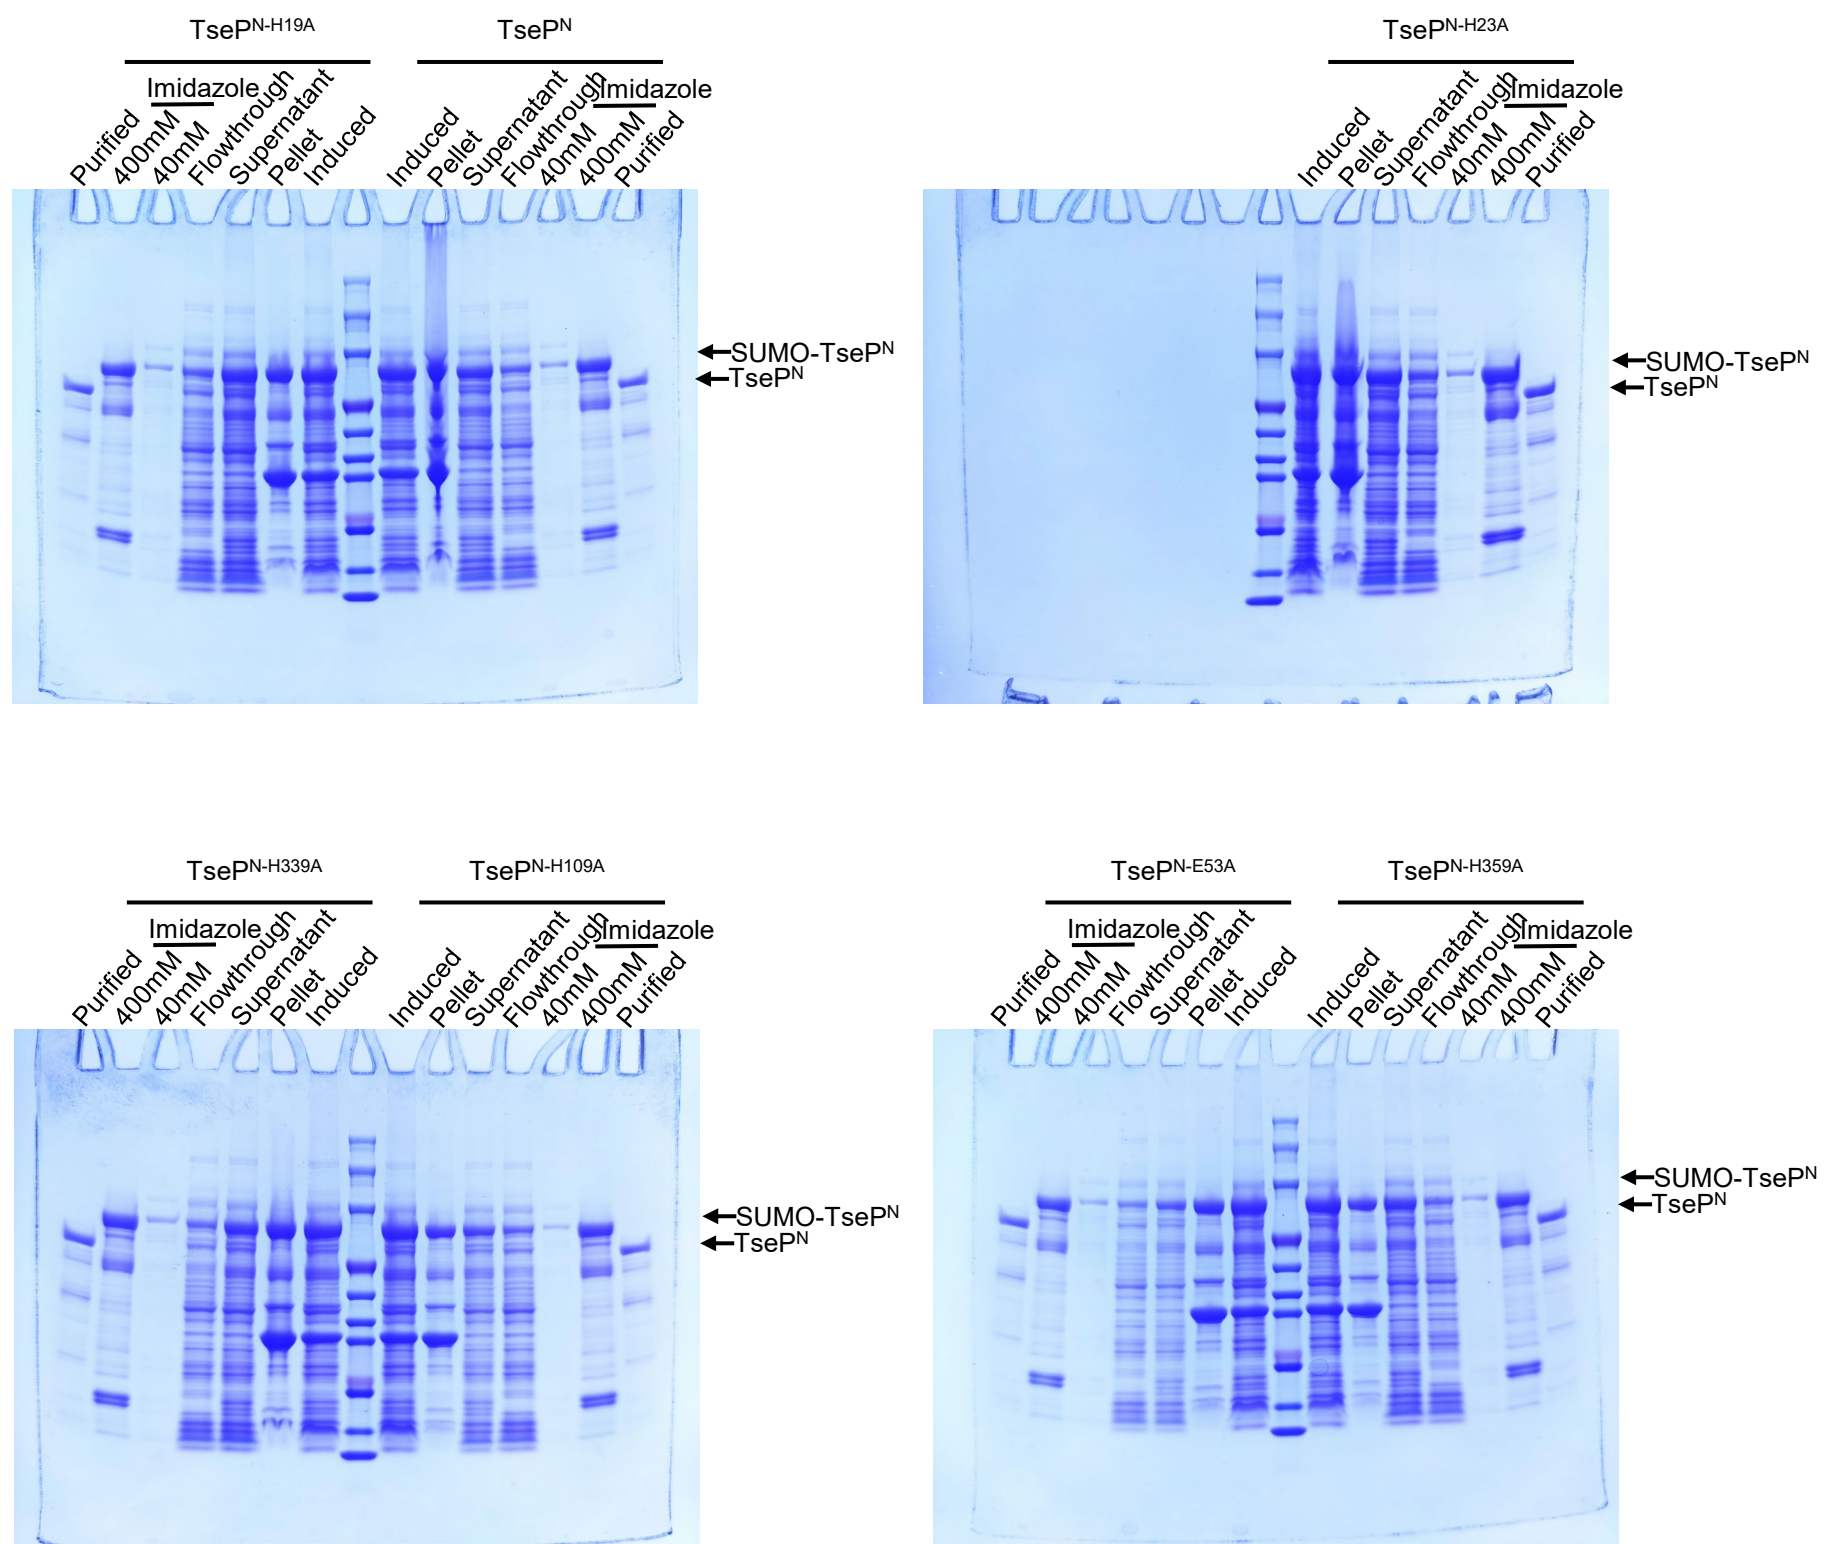

**Figure 7-figure supplement 3C**, Purification of TseP<sup>N</sup> variants with a His-SUMO tag. The His-SUMO tag was removed by SUMO protease.

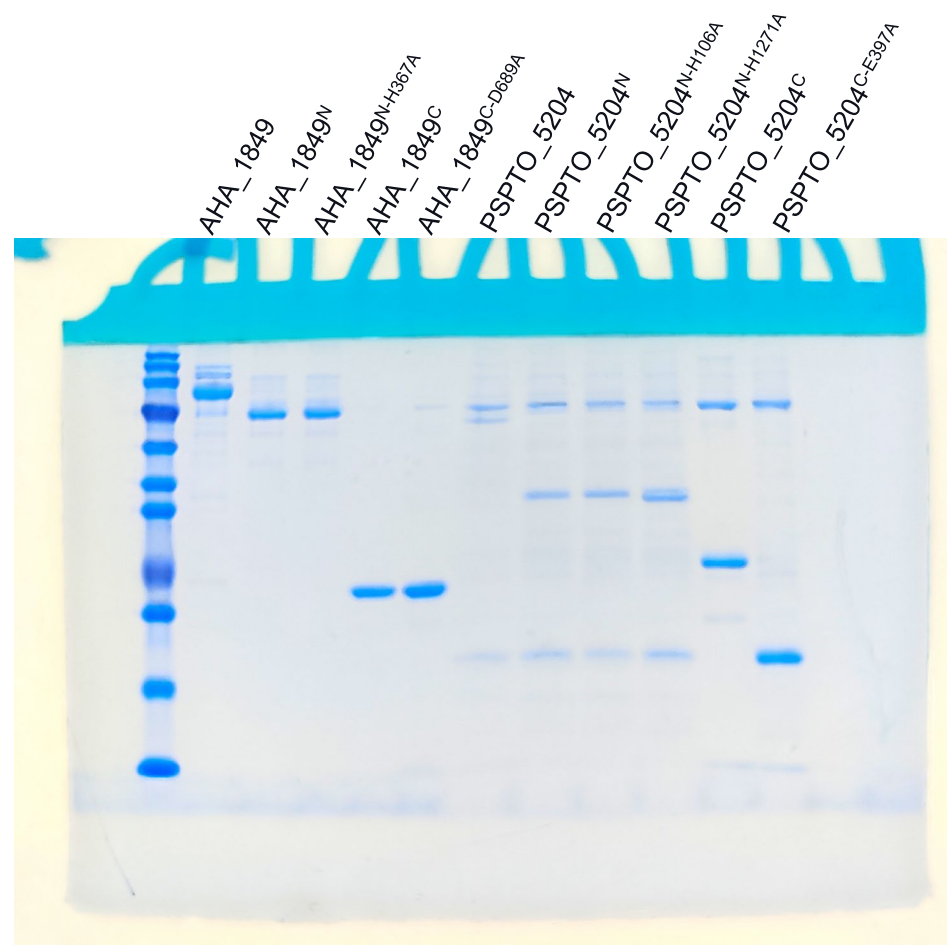

**Figure 7-figure supplement 3D**, Purification of AHA\_1849, PSPTO\_5204, and their mutants. Proteins were used for PG-digestion analysis in Figure 4B and 4C.

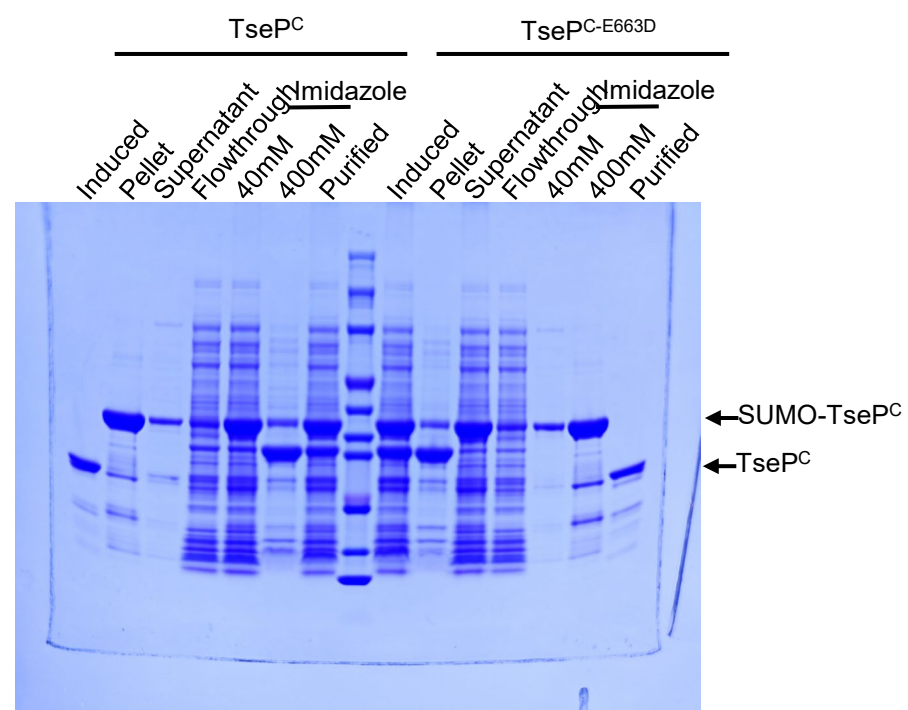

**Figure 7-figure supplement 3E**, Purification of TseP<sup>C</sup> and TseP<sup>C-E663D</sup> with an His-SUMO tag. The His-SUMO tag was removed by SUMO protease.

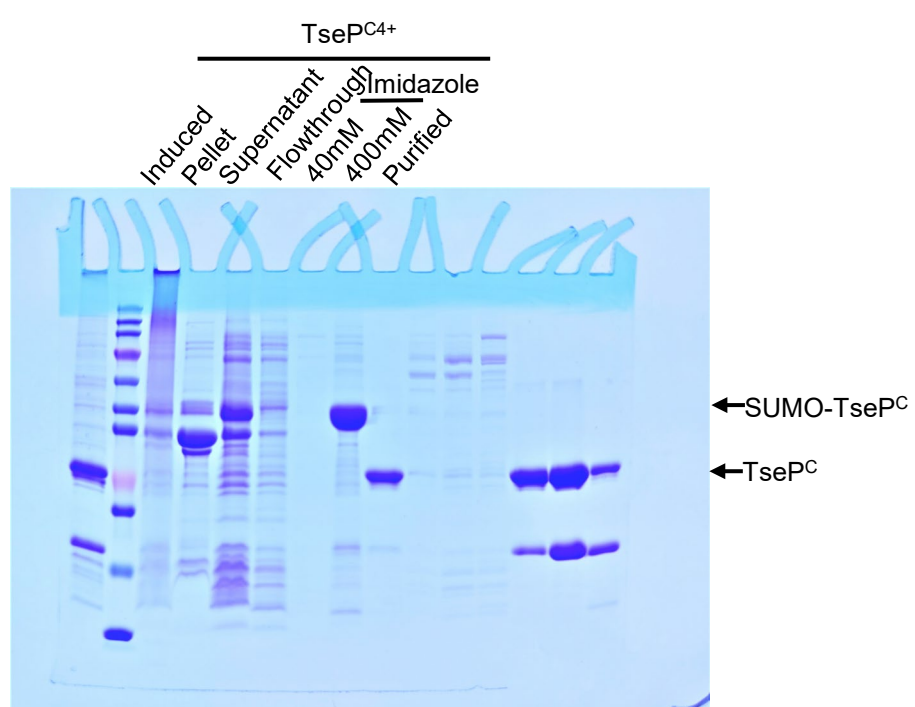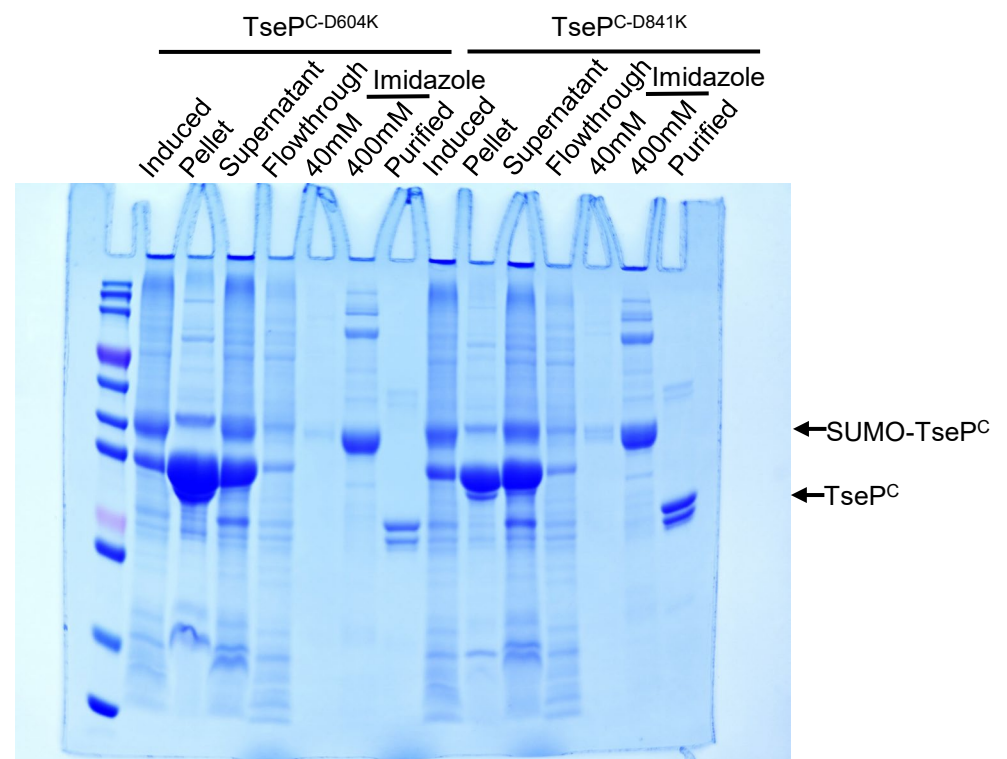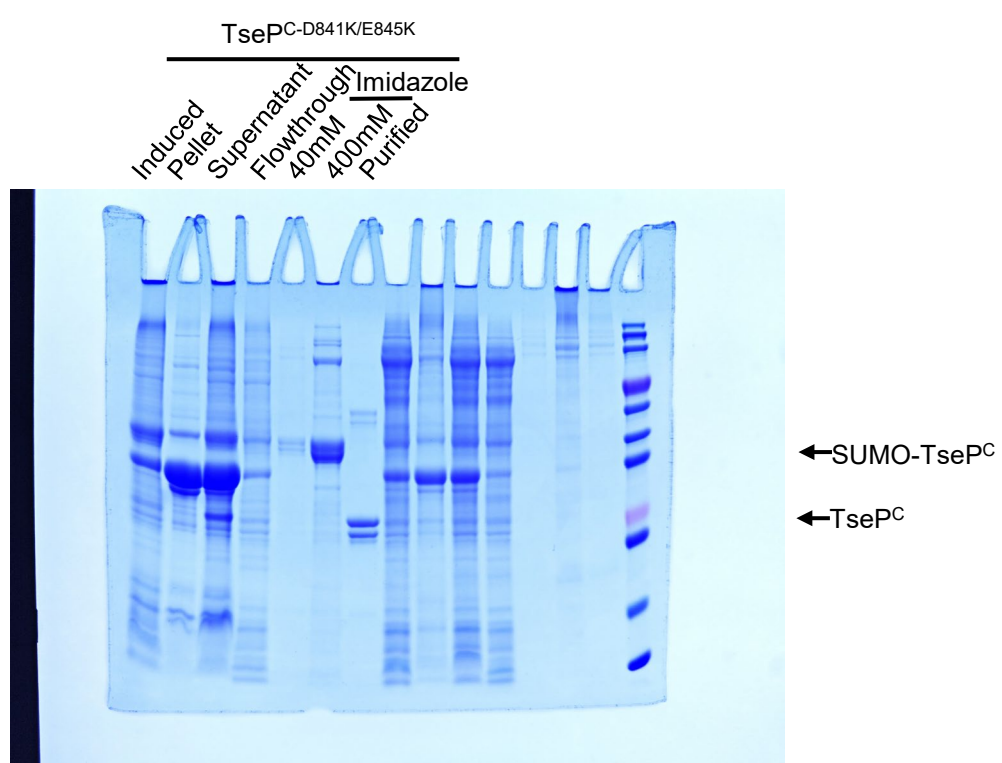

**Figure 7-figure supplement 3F**, Purification of TsePC<sup>C</sup> variants with an His-SUMO tag. The His-SUMO tag was removed by SUMO protease.
