# Supplementary material for: Amidase and lysozyme dual functions in TseP reveal a new family of chimeric effectors in the type VI secretion system
Source: eLife. 2025 Mar 10;13:RP101125. doi: 10.7554/eLife.101125 (PMC11893102; doi:10.7554/eLife.101125)
Supplement: Supplementary file 2. [file elife-101125-supp2.xlsx]

## Sheet: alis_afdb50
Number	Target	Sequence identity	E-value	Scientific Name
1	AF-K1JFN7-F1-model_v4 EF-hand domain-containing protein	100	0	Aeromonas dhakensis
2	AF-A0A3S4T080-F1-model_v4 Phage-related lysozyme (Muraminidase)	88.6	0	Aeromonas encheleia
3	AF-A0A2P1VPN0-F1-model_v4 Uncharacterized protein	48.2	0	Plesiomonas shigelloides
4	AF-A0A379CLM5-F1-model_v4 Predicted chitinase	49.3	0	Plesiomonas shigelloides
5	AF-A0A7Z2UK12-F1-model_v4 Uncharacterized protein	92.1	0	Aeromonas hydrophila
6	AF-A0A2S3XNF5-F1-model_v4 Glyco_hydro_19_cat domain-containing protein	45.9	0	Aeromonas veronii
7	AF-A0A7D5T027-F1-model_v4 Pesticin domain-containing protein	47.2	0	Aeromonas veronii
8	AF-A0A0S2SIZ0-F1-model_v4 Uncharacterized protein	47.1	0	Aeromonas schubertii
9	AF-A0A2H9U6E9-F1-model_v4 Muramidase domain-containing protein	41.8	0	Aeromonas cavernicola
10	AF-A0A806XLZ8-F1-model_v4 Uncharacterized protein	93	0	Aeromonas hydrophila
11	AF-A0A327QPZ1-F1-model_v4 Uncharacterized protein DUF3380	22.3	0	Aeromonas salmonicida
12	AF-A0A2R7QGU1-F1-model_v4 EF-hand domain-containing protein	21.7	0	Aeromonas sp. HMWF015
13	AF-A0A653KIA7-F1-model_v4 EF-hand domain-containing protein	22.7	0	Aeromonas salmonicida
14	AF-A0A1Z1NNX9-F1-model_v4 EF-hand domain-containing protein	22.4	0	Aeromonas salmonicida
15	AF-A0A7G1LC66-F1-model_v4 EF-hand domain-containing protein	21.8	0	Aeromonas hydrophila
16	AF-A0A6M4XMF1-F1-model_v4 EF-hand domain-containing protein	21.9	0	Aeromonas sp. 2692-1
17	AF-A0A833JXN3-F1-model_v4 Uncharacterized protein	22	0	Aeromonas veronii
18	AF-Q0PZF6-F1-model_v4 Uncharacterized protein	100	0	Aeromonas hydrophila
19	AF-A0A0D5XR60-F1-model_v4 EF-hand domain-containing protein	21.9	0	Pseudomonas chlororaphis
20	AF-A0A653L6J0-F1-model_v4 Predicted chitinase (Modular protein)	21.5	0	Aeromonas veronii
21	AF-A0A1J0EL78-F1-model_v4 NlpC/P60 domain-containing protein	21.4	0	Pseudomonas frederiksbergensis
22	AF-A0A2N1GRP9-F1-model_v4 Peptidase_M23 domain-containing protein	21.2	0	Pseudomonas sp. Choline-02u-1
23	AF-A0A5C5Q324-F1-model_v4 Peptidase_M23 domain-containing protein	20.8	0	Pseudomonas extremaustralis
24	AF-A0A2R7SQD1-F1-model_v4 Uncharacterized protein	19.2	0	Pseudomonas sp. HMWF010
25	AF-A0A7Y9WFN0-F1-model_v4 Putative chitinase	22.6	0	Paraburkholderia bryophila
26	AF-J2YI06-F1-model_v4 Putative chitinase	22.7	0	Pseudomonas sp. GM24
27	AF-A0A2S8HLX4-F1-model_v4 Uncharacterized protein	22.6	0	Pseudomonas frederiksbergensis
28	AF-A0A0Q0AGB6-F1-model_v4 EF hand domain protein	22.1	0	Pseudomonas syringae pv. solidagae
29	AF-A0A2G0VN88-F1-model_v4 Chitinase	23	0	Pseudomonas sp. ICMP 460
30	AF-A0A7Y9VVZ1-F1-model_v4 NlpC/P60 domain-containing protein	22.3	0	Pseudomonas moraviensis
31	AF-A0A4Y8H7G8-F1-model_v4 EF-hand domain-containing protein	21.3	0	Pseudomonas sp. LAIL14HWK12:I2
32	AF-M4WVA5-F1-model_v4 NlpC/P60 domain-containing protein	21.7	0	Pseudomonas sp. ATCC 13867
33	AF-W6VFM9-F1-model_v4 Calcium-binding EF-hand-containing protein	21.1	0	Pseudomonas sp. GM30
34	AF-A0A0P9QD83-F1-model_v4 EF hand domain protein	22.3	0	Pseudomonas syringae pv. delphinii
35	AF-A0A654AQ01-F1-model_v4 Uncharacterized protein	19	0	Pseudomonas sp. 9AZ
36	AF-A0A3M4VTT8-F1-model_v4 EF-hand domain-containing protein	22	0	Pseudomonas cichorii
37	AF-A0A5H2XRQ8-F1-model_v4 Uncharacterized protein	21.6	0	Pseudomonas sp. KUIN-1
38	AF-A0A5N7JSJ8-F1-model_v4 DUF3380 domain-containing protein	22.3	0	Pseudomonas kitaguniensis
39	AF-A0A1H7NW51-F1-model_v4 NlpC/P60 domain-containing protein	19.3	0	Atopomonas hussainii
40	AF-C4LFJ6-F1-model_v4 Uncharacterized protein	19.8	0	Tolumonas auensis DSM 9187
41	AF-A0A162AU51-F1-model_v4 Uncharacterized protein	21.1	0	Pseudomonas fluorescens
42	AF-A0A3M4FRA9-F1-model_v4 Peptidase_M23 domain-containing protein	21.6	0	Pseudomonas syringae pv. berberidis
43	AF-A0A1G3E770-F1-model_v4 Uncharacterized protein	19.6	0	Pseudomonadales bacterium RIFCSPHIGHO2_02_FULL_60_43
44	AF-A0A5C7W1M1-F1-model_v4 NlpC/P60 domain-containing protein	17.9	0	Pseudomonas alcaligenes
45	AF-A0A653Q6X3-F1-model_v4 Hydrolase_2 domain-containing protein	19.8	0	Pseudomonas sp. 8BK
46	AF-A0A7G7ETT0-F1-model_v4 Uncharacterized protein	86.1	0	Aeromonas jandaei
47	AF-A0A4S3YGT8-F1-model_v4 Chitinase	21.6	0	Pseudomonas atacamensis
48	AF-A0A2S5KSA6-F1-model_v4 EF-hand domain-containing protein	15.5	0	Proteobacteria bacterium 228
49	AF-A0A2R7NF23-F1-model_v4 Peptidase_M23 domain-containing protein	21.8	0	Pseudomonas sp. HMWF021
50	AF-A0A419N388-F1-model_v4 Uncharacterized protein	21.4	0	Rahnella woolbedingensis
51	AF-A0A7T8M4B8-F1-model_v4 N-acetylmuramoyl-L-alanine amidase	16.1	0	Entomomonas asaccharolytica
52	AF-A0A318C115-F1-model_v4 EF-hand domain-containing protein	16.1	0	Pokkaliibacter plantistimulans
53	AF-A0A7A3AZZ1-F1-model_v4 Lysozyme	19.9	0	Escherichia coli
54	AF-A0A859WGH6-F1-model_v4 DUF3380 domain-containing protein	20.7	0	Klebsiella grimontii
55	AF-A0A4C3GAJ5-F1-model_v4 Uncharacterized protein	20	0	Escherichia coli
56	AF-A0A0J5KRC0-F1-model_v4 Uncharacterized protein	20.4	0	Pluralibacter gergoviae
57	AF-A0A4R6DPZ0-F1-model_v4 Phage lysozyme-like predicted toxin	20.3	0	Buttiauxella sp. JUb87
58	AF-C7C507-F1-model_v4 Lysozyme	18.8	0	Siccibacter turicensis
59	AF-A0A479JZR6-F1-model_v4 Pesticin domain-containing protein	20.4	0	Escherichia coli
60	AF-A0A2U3ES87-F1-model_v4 Uncharacterized protein	17.6	0	Enterobacter sp. CGMCC 5087
61	AF-I2B6W7-F1-model_v4 EF-hand domain-containing protein	17.5	0	Shimwellia blattae DSM 4481 = NBRC 105725
62	AF-A0A3R8YYI2-F1-model_v4 EF-hand domain-containing protein	17.1	0	Enterobacter cloacae
63	AF-A0A8B3UVL6-F1-model_v4 Phage-related lysozyme (Muraminidase)	18.4	0	Enterobacter hormaechei
64	AF-A0A3S4JC07-F1-model_v4 Predicted chitinase	17.4	0	Cedecea lapagei
65	AF-W0BP28-F1-model_v4 Chitinase	16.4	0	Enterobacter ludwigii
66	AF-A0A2K8W0N2-F1-model_v4 Uncharacterized protein	16.7	0	Dickeya solani RNS 08.23.3.1.A
67	AF-I2B6V6-F1-model_v4 EF-hand domain-containing protein	17.5	0	Shimwellia blattae DSM 4481 = NBRC 105725
68	AF-I2B6W3-F1-model_v4 EF-hand domain-containing protein	17.3	0	Shimwellia blattae DSM 4481 = NBRC 105725
69	AF-A0A5F0JQZ1-F1-model_v4 EF-hand domain-containing protein	17.6	0	Enterobacter sp. A11
70	AF-A0A3N4P755-F1-model_v4 EF-hand domain-containing protein	17.4	0	Pantoea sp. RIT388
71	AF-W0BUM4-F1-model_v4 LYZ2 domain-containing protein	17.8	0	Enterobacter ludwigii
72	AF-A0A7T8M297-F1-model_v4 Peptidoglycan DD-metalloendopeptidase family protein	16.4	0	Entomomonas asaccharolytica
73	AF-A0A379SC66-F1-model_v4 Phage-related lysozyme (Muraminidase)	18.2	0	Salmonella enterica
74	AF-A0A3S7DM35-F1-model_v4 Peptidase_M23 domain-containing protein	18.6	0	Aeromonas sp. ASNIH4
75	AF-A0A2H4ZHK7-F1-model_v4 Phage-encoded peptidoglycan binding protein	16.4	0	Raoultella ornithinolytica
76	AF-A0A5C7BYA2-F1-model_v4 Uncharacterized protein	18.3	0	Serratia marcescens
77	AF-A0A433SF78-F1-model_v4 N-acetylmuramoyl-L-alanine amidase	16.6	0	Saezia sanguinis
78	AF-W1J536-F1-model_v4 Muramidase domain-containing protein	17.8	0	Xenorhabdus szentirmaii DSM 16338
79	AF-A0A3T0ZYT9-F1-model_v4 Peptidase_M23 domain-containing protein	18.7	0	Aeromonas hydrophila
80	AF-A0A0A0CQD6-F1-model_v4 EF-hand domain-containing protein	17.2	0	Photorhabdus luminescens
81	AF-A0A7T8THQ7-F1-model_v4 CHAP domain-containing protein	18.9	0	Klebsiella pneumoniae
82	AF-A0A6G6JN88-F1-model_v4 AAA_lid_9 domain-containing protein	17	0	Pantoea stewartii
83	AF-A0A0U1KJV7-F1-model_v4 Phage-related lysozyme (Muraminidase)	15.2	0	Yersinia mollaretii
84	AF-A0A4R6E4I7-F1-model_v4 EF-hand domain-containing protein	17.9	0	Buttiauxella sp. JUb87
85	AF-A0A2K8QIQ6-F1-model_v4 Uncharacterized protein	18.5	0	Dickeya fangzhongdai
86	AF-A0A379T132-F1-model_v4 Lytic enzyme	16.4	0	Salmonella enterica subsp. arizonae
87	AF-Q58PV0-F1-model_v4 Uncharacterized protein	16.7	0	Erwinia amylovora
88	AF-A0A0U1HZC6-F1-model_v4 Uncharacterized protein	16.1	0	Yersinia mollaretii
89	AF-A0A7G5CV67-F1-model_v4 Uncharacterized protein	17.9	0	Ewingella americana
90	AF-A0A377N8F4-F1-model_v4 Phage-related lysozyme (Muraminidase)	18.3	0	Ewingella americana
91	AF-A0A085G4I9-F1-model_v4 EF-hand domain-containing protein	17.9	0	Ewingella americana ATCC 33852
92	AF-A0A4R1NF17-F1-model_v4 Putative chitinase	17.1	0	Sodalis ligni
93	AF-A0A1Y0KXH2-F1-model_v4 Pesticin domain-containing protein	17.5	0	Pseudomonas sp. M30-35
94	AF-A0A7R8RD58-F1-model_v4 EF-hand domain-containing protein	18.6	0	Enterobacter cancerogenus
95	AF-A4JG68-F1-model_v4 PG_binding_3 domain-containing protein	18.2	0	Burkholderia vietnamiensis G4
96	AF-A0A0D5J4V0-F1-model_v4 Bacterial SH3 domain protein	18	0	Burkholderia dolosa AU0158
97	AF-A0A6I6IKF0-F1-model_v4 Glyco_hydro_19_cat domain-containing protein	19.2	0	Tatumella sp. TA1
98	AF-A0A379SD19-F1-model_v4 Predicted chitinase	18.7	0	Salmonella enterica
99	AF-A0A379QFF5-F1-model_v4 Phage-related lysozyme (Muraminidase)	18.7	0	Salmonella enterica
100	AF-A0A3G2IKU8-F1-model_v4 EF-hand domain-containing protein	17.1	0	Buttiauxella sp. 3AFRM03
101	AF-A0A5J6R8G5-F1-model_v4 Uncharacterized protein	17.2	0	Pseudomonas denitrificans (nom. rej.)
102	AF-A0A2J9E7X6-F1-model_v4 EF-hand domain-containing protein	17.5	0	Pantoea sp. FDAARGOS_194
103	AF-C9Y3H6-F1-model_v4 EF-hand domain-containing protein	19.4	0	Cronobacter turicensis z3032
104	AF-A0A246F5G2-F1-model_v4 Pesticin domain-containing protein	17.6	0	Pseudomonas nitroreducens
105	AF-A0A1I5NKC8-F1-model_v4 Predicted chitinase	16.4	0	Pseudomonas sagittaria
106	AF-A0A828S2D7-F1-model_v4 Chitinase class I family protein	18.5	0	Escherichia coli STEC_7v
107	AF-A0A1G7UVY5-F1-model_v4 Predicted chitinase	18.3	0	Paraburkholderia phenazinium
108	AF-A0A1C6YXU7-F1-model_v4 Mannosyl-glycoprotein endo-beta-N-acetylglucosaminidase	20.5	0	Hafnia alvei
109	AF-A0A0U1KI05-F1-model_v4 Putative endolysin	16.2	0	Yersinia mollaretii
110	AF-A0A7Y8YN20-F1-model_v4 Glycoside hydrolase family 73 protein	18.1	0	Enterobacter bugandensis
111	AF-A0A702L6W9-F1-model_v4 Uncharacterized protein	18.7	0	Salmonella enterica subsp. salamae
112	AF-A0A381KQ07-F1-model_v4 Peptidoglycan hydrolase flgJ	18.3	0	Buttiauxella agrestis
113	AF-A0A1H1LQD9-F1-model_v4 Uncharacterized protein	16.1	0	Pseudomonas oryzae
114	AF-J3DH08-F1-model_v4 Putative chitinase	18.7	0	Pantoea sp. GM01
115	AF-A0A1E4WMW2-F1-model_v4 Uncharacterized protein	17.7	0	Pseudomonas sp. ENNP23
116	AF-A0A7Y8YKH4-F1-model_v4 Glycoside hydrolase family 104 protein	18.5	0	Enterobacter bugandensis
117	AF-A0A2K1Q4G0-F1-model_v4 EF-hand domain-containing protein	17.6	0	Mixta theicola
118	AF-A0A2A7TB69-F1-model_v4 Uncharacterized protein	19.5	0	Yersinia kristensenii
119	AF-A0A7Z9CSA0-F1-model_v4 Phage-related lysozyme (Muraminidase)	15.7	0	Raoultella terrigena
120	AF-A0A379QQR5-F1-model_v4 Phage-related lysozyme (Muraminidase)	19.9	0	Salmonella enterica
121	AF-A0A0D5IZJ8-F1-model_v4 Bacterial SH3 domain protein	18	0	Burkholderia dolosa AU0158
122	AF-A0A1G6IK64-F1-model_v4 Predicted chitinase	16.3	0	Pseudomonas chengduensis
123	AF-A0A071MRH4-F1-model_v4 Calcium-binding protein	18.5	0	Burkholderia cenocepacia
124	AF-A0A5J6QZL7-F1-model_v4 Uncharacterized protein	18.3	0	Pseudomonas denitrificans (nom. rej.)
125	AF-A0A1P9Y714-F1-model_v4 Pesticin domain-containing protein	19.2	0	Burkholderia sp. KK1
126	AF-A0A4V2Q2X0-F1-model_v4 Putative chitinase	17	0	Sodalis ligni
127	AF-A0A8B2FA03-F1-model_v4 Uncharacterized protein	17.9	0	Providencia stuartii
128	AF-A0A7L5V640-F1-model_v4 Lysozyme	18.1	0	Escherichia coli
129	AF-A0A1B4BU39-F1-model_v4 Uncharacterized protein	18.2	0	Burkholderia diffusa
130	AF-A0A7T8M2F1-F1-model_v4 N-acetylmuramoyl-L-alanine amidase	15.2	0	Entomomonas asaccharolytica
131	AF-A0A2X4WAZ9-F1-model_v4 Phage-related lysozyme (Muraminidase)	15.9	0	Salmonella enterica subsp. arizonae
132	AF-A0A2A2E430-F1-model_v4 Uncharacterized protein	18	0	Pseudomonas sp. PIC25
133	AF-A0A560URU2-F1-model_v4 Cell wall hydrolase	17.7	0	Burkholderia sp. SJZ115
134	AF-A0A7Y7WS97-F1-model_v4 Uncharacterized protein	17.9	0	Pseudomonas gingeri
135	AF-A0A8A8MKJ9-F1-model_v4 Uncharacterized protein	18.3	0	Burkholderia glumae
136	AF-A0A2S8RTK3-F1-model_v4 EF hand domain-containing protein	17.5	0	Paraburkholderia sp. BL21I4N1
137	AF-A0A3M2H916-F1-model_v4 EF-hand domain-containing protein	16.6	0	Pseudomonas sp. AOB-7
138	AF-A0A1R1J8H9-F1-model_v4 Uncharacterized protein	18.3	0	Burkholderia ubonensis
139	AF-A0A3A6QN54-F1-model_v4 Glyco_hydro_19_cat domain-containing protein	19.5	0	Pseudomonas sp. LS-2
140	AF-W0BWA6-F1-model_v4 Uncharacterized protein	18.5	0	Enterobacter ludwigii
141	AF-A0A423K9E3-F1-model_v4 Uncharacterized protein	18.3	0	Pseudomonas frederiksbergensis
142	AF-A0A6S5RPI3-F1-model_v4 Pesticin domain-containing protein	17.2	0	Pseudomonas otitidis
143	AF-A0A391NEB5-F1-model_v4 Uncharacterized protein	16	0	Pseudomonas sp. SCT
144	AF-A0A1V4LXQ2-F1-model_v4 Uncharacterized protein	16.8	0	Pseudomonas sp. VI4.1
145	AF-A0A0D6SA67-F1-model_v4 Uncharacterized protein	17.6	0	Pseudomonas sp. FeS53a
146	AF-A0A0D9AI65-F1-model_v4 Glyco_hydro_19_cat domain-containing protein	18	0	Stutzerimonas stutzeri
147	AF-A0A1V9USM0-F1-model_v4 Uncharacterized protein	17	0	Pseudomonas sp. T
148	AF-A0A3D3M8H8-F1-model_v4 Uncharacterized protein	18.1	0	Pseudomonas sp.
149	AF-A0A2W5CSX5-F1-model_v4 Muramidase domain-containing protein	18.9	0	Pseudomonas kuykendallii
150	AF-A0A679GDI2-F1-model_v4 Uncharacterized protein	17.1	0	Pseudomonas otitidis
151	AF-A0A210XXD3-F1-model_v4 Uncharacterized protein	17.4	0	Stutzerimonas stutzeri
152	AF-C5AP31-F1-model_v4 EF hand domain-containing protein	17.7	0	Burkholderia glumae BGR1
153	AF-A0A8B3VH40-F1-model_v4 Chitinase class I family protein	18.4	0	Burkholderia multivorans
154	AF-A0A5E7AHE3-F1-model_v4 EF-hand domain-containing protein	18.3	0	Pseudomonas fluorescens
155	AF-A0A2N7W9Y3-F1-model_v4 Uncharacterized protein	18.4	0	Trinickia soli
156	AF-A0A5E6ZGV0-F1-model_v4 EF-hand domain-containing protein	17.5	0	Pseudomonas fluorescens
157	AF-S6JGB7-F1-model_v4 Uncharacterized protein	16.8	0	Stutzerimonas stutzeri B1SMN1
158	AF-A0A2T0HPH8-F1-model_v4 Uncharacterized protein	18.8	0	Pseudomonas simiae
159	AF-A0A024H9M8-F1-model_v4 EF-hand domain-containing protein	17.6	0	Pseudomonas knackmussii B13
160	AF-A0A4U3I8H5-F1-model_v4 DUF3380 domain-containing protein	19.5	0	Pseudomonas sp. CFBP13528
161	AF-A0A1V9ULV9-F1-model_v4 Uncharacterized protein	16.9	0	Pseudomonas sp. T
162	AF-A0A1H5NKN3-F1-model_v4 Uncharacterized protein	19	0	Pseudomonas migulae
163	AF-A0A1G8U540-F1-model_v4 Uncharacterized protein	18.3	0	Pseudomonas indica
164	AF-A0A1V9UI10-F1-model_v4 EF-hand domain-containing protein	17.8	0	Pseudomonas sp. Bc-h
165	AF-A0A5E7FBZ7-F1-model_v4 EF-hand domain-containing protein	17.4	0	Pseudomonas fluorescens
166	AF-A0A7Y1A897-F1-model_v4 EF-hand domain-containing protein	18.6	0	Pseudomonas veronii
167	AF-B1JAM9-F1-model_v4 EF-hand domain-containing protein	18.2	0	Pseudomonas putida W619
168	AF-A0A4R1PK41-F1-model_v4 Phage lysozyme-like predicted toxin	18.5	0	Azotobacter chroococcum
169	AF-A0A5E7G4Z9-F1-model_v4 Pesticin domain-containing protein	17.6	0	Pseudomonas fluorescens
170	AF-A0A4R8M1H9-F1-model_v4 Uncharacterized protein	17.9	0	Paraburkholderia rhizosphaerae
171	AF-A0A1G8IEF5-F1-model_v4 Predicted chitinase	18.7	0	Pseudomonas panipatensis
172	AF-A0A2N7VP26-F1-model_v4 Uncharacterized protein	18.6	0	Trinickia dabaoshanensis
173	AF-A0A0U4P8L8-F1-model_v4 Uncharacterized protein	17	0	Pseudomonas oryzihabitans
174	AF-A0A4V2KQ09-F1-model_v4 Uncharacterized protein	18.6	0	Azotobacter chroococcum subsp. isscasi
175	AF-A0A2X4WTC5-F1-model_v4 Phage-related lysozyme (Muraminidase)	16.1	0	Salmonella enterica subsp. arizonae
176	AF-A0A1H2B4C6-F1-model_v4 Pesticin domain-containing protein	17.6	0	Pseudomonas umsongensis
177	AF-A0A1H1X442-F1-model_v4 Predicted chitinase	17.9	0	Pseudomonas umsongensis
178	AF-A0A2Y9U1D3-F1-model_v4 Uncharacterized protein	15.9	0	Limnobaculum parvum
179	AF-A0A3T0SBJ4-F1-model_v4 Uncharacterized protein	14.9	0	Pseudomonadaceae bacterium SI-3
180	AF-E5B1N7-F1-model_v4 Uncharacterized protein	15.4	0	Erwinia amylovora ATCC BAA-2158
181	AF-A0A7Y0ZFU7-F1-model_v4 Uncharacterized protein	18.8	0	Pseudomonas sp. WS 5010
182	AF-A0A6P2ZV10-F1-model_v4 Calcium-binding protein	17.3	0	Burkholderia contaminans
183	AF-A0A5E6SYA6-F1-model_v4 Uncharacterized protein	17.9	0	Pseudomonas fluorescens
184	AF-A0A5E6XXC3-F1-model_v4 Uncharacterized protein	16.9	0	Pseudomonas fluorescens
185	AF-A0A0S8ZK03-F1-model_v4 Uncharacterized protein	17.9	0	Pseudomonas sp. Leaf48
186	AF-A0A3G2IG66-F1-model_v4 EF-hand domain-containing protein	17.8	0	Buttiauxella sp. 3AFRM03
187	AF-A0A329I0V7-F1-model_v4 SH3b domain-containing protein	15.9	0	Pseudomonas sp. RIT 411
188	AF-A0A379DT67-F1-model_v4 Predicted chitinase	15.3	0	Pragia fontium
189	AF-A0A2R7PQD8-F1-model_v4 Uncharacterized protein	20.8	0	Aeromonas sp. HMWF014
190	AF-A0A6J4EDA1-F1-model_v4 Uncharacterized protein	18	0	Pseudomonas tohonis
191	AF-A0A7U6E5V9-F1-model_v4 Lytic transglycosylase domain-containing protein	17.3	0	Burkholderia multivorans
192	AF-A0A4Q1CRB3-F1-model_v4 EF-hand domain-containing protein	17.4	0	Stenotrophomonas sp. MA5
193	AF-A0A653B4F2-F1-model_v4 Predicted chitinase (Modular protein)	14.4	0	Pseudomonas oleovorans
194	AF-A0A1B8VBW7-F1-model_v4 Uncharacterized protein	17.8	0	Pseudomonas sp. AU11447
195	AF-A0A242ND96-F1-model_v4 Uncharacterized protein	13.6	0	Gilliamella apicola
196	AF-A0A856CLC3-F1-model_v4 Lytic transglycosylase domain-containing protein	16.5	0	Xanthomonas oryzae
197	AF-A0A1K2HS13-F1-model_v4 Pesticin domain-containing protein	15.8	0	Chitinimonas taiwanensis DSM 18899
198	AF-A0A1G7ZEX0-F1-model_v4 Putative peptidoglycan binding domain-containing protein	13.8	0	Vibrio xiamenensis
199	AF-A0A379SP72-F1-model_v4 Phage-related lysozyme (Muraminidase)	16.8	0	Salmonella enterica subsp. arizonae
200	AF-A0A4R3I7M2-F1-model_v4 EF-hand domain-containing protein	14.2	0	Reinekea marinisedimentorum
201	AF-Q8KR50-F1-model_v4 Uncharacterized protein	16.6	0	Escherichia fergusonii
202	AF-A0A2E9AMK4-F1-model_v4 EF-hand domain-containing protein	17.9	0	Salinisphaera sp.
203	AF-A0A1T5C8Y0-F1-model_v4 Muramidase domain-containing protein	13.1	0	Luteibacter sp. 22Crub2.1
204	AF-A0A118KC83-F1-model_v4 SH3b domain-containing protein	14.5	0	Burkholderia cepacia
205	AF-A0A0U4CZN5-F1-model_v4 SH3b domain-containing protein	14.5	0	Burkholderia cepacia JBK9
206	AF-A0A1B9L7U1-F1-model_v4 Uncharacterized protein	13.6	0	Gilliamella apicola
207	AF-A0A2G5NA41-F1-model_v4 EF-hand domain-containing protein	17.2	0	Pseudomonas sp. 2822-17
208	AF-A0A4P6GBD5-F1-model_v4 EF-hand domain-containing protein	18.2	0	Pseudomonas arsenicoxydans
209	AF-A0A423ES90-F1-model_v4 EF-hand domain-containing protein	15.7	0	Pseudomonas poae
210	AF-C9QG57-F1-model_v4 Uncharacterized protein	16.7	0	Vibrio orientalis CIP 102891 = ATCC 33934
211	AF-A0A423FH36-F1-model_v4 Uncharacterized protein	17.3	0	Pseudomonas canadensis
212	AF-A0A4S3GQW9-F1-model_v4 Cell wall hydrolase	14.7	0	Burkholderia cepacia
213	AF-A0A484GEZ8-F1-model_v4 N-acetylmuramoyl-L-alanine amidase	13.1	0	Candidatus Schmidhempelia bombi str. Bimp
214	AF-A0A2I7SIG5-F1-model_v4 EF-hand domain-containing protein	15.3	0	Tamlana carrageenivorans
215	AF-A0A7U1G1C4-F1-model_v4 EF-hand domain-containing protein	13.8	0	Tamlana sp. s12
216	AF-A0A1B9LD41-F1-model_v4 Uncharacterized protein	14.2	0	Gilliamella apicola
217	AF-A0A1G7IL54-F1-model_v4 Muramidase domain-containing protein	14.9	0	Dyella sp. 333MFSha
218	AF-A0A841GG37-F1-model_v4 Uncharacterized protein	16.5	0	Tolumonas osonensis
219	AF-F8H458-F1-model_v4 SH3b domain-containing protein	15.9	0	Stutzerimonas stutzeri ATCC 17588 = LMG 11199
220	AF-A0A418YD95-F1-model_v4 Uncharacterized protein	13.8	0	Motilimonas pumila
221	AF-A0A556RUH6-F1-model_v4 Uncharacterized protein	12.8	0	Gilliamella apicola
222	AF-A0A1B9KHW1-F1-model_v4 Peptidase_M23 domain-containing protein	13.6	0	Gilliamella apicola
223	AF-A0A1S2CYG0-F1-model_v4 Lysozyme	25	0	Aeromonas sobria
224	AF-A0A5C5QKE5-F1-model_v4 Uncharacterized protein	17.3	0	Pseudomonas extremaustralis
225	AF-A0A286NTW3-F1-model_v4 EF-hand domain-containing protein	13.2	0	Capnocytophaga cynodegmi
226	AF-A0A2A2DRY7-F1-model_v4 Calcium-binding protein	17.3	0	Pseudomonas sp. PICF141
227	AF-Q87UT8-F1-model_v4 EF hand domain protein	19.8	0	Pseudomonas syringae pv. tomato str. DC3000
228	AF-A0A3N6UZI5-F1-model_v4 EF-hand domain-containing protein	22.1	0	Aeromonas jandaei
229	AF-A0A2D5VUQ5-F1-model_v4 Uncharacterized protein	15.5	0	Pseudomonas sp.
230	AF-A0A5C5VU41-F1-model_v4 N-acetylmuramoyl-L-alanine amidase	15.7	0	Phycisphaerae bacterium RAS1
231	AF-A0A7Z1PR97-F1-model_v4 Uncharacterized protein	20.4	0	Salmonella enterica subsp. enterica
232	AF-A0A6S4ZVB6-F1-model_v4 EF-hand domain-containing protein	24.3	0	Aeromonas caviae
233	AF-A0A7U9F7W2-F1-model_v4 Uncharacterized protein	17.8	0	Pseudomonas alcaligenes OT 69
234	AF-S3IX33-F1-model_v4 EF-hand domain-containing protein	15.5	0	Cedecea davisae DSM 4568
235	AF-A0A4Q2QTF0-F1-model_v4 Uncharacterized protein	17.9	0	Enterobacter cloacae complex sp. 743-2DZ2F-22B
236	AF-A0A379S026-F1-model_v4 EF-hand domain-containing protein	22.4	0	Salmonella enterica subsp. arizonae
237	AF-A0A1B9LC22-F1-model_v4 Uncharacterized protein	12.8	0	Gilliamella apicola
238	AF-A0A2N1XA44-F1-model_v4 Uncharacterized protein	15.2	0	Gammaproteobacteria bacterium HGW-Gammaproteobacteria-5
239	AF-A0A7X3HDR3-F1-model_v4 Uncharacterized protein	16.5	0	Pseudomonas otitidis
240	AF-A0A497WKJ2-F1-model_v4 SH3b domain-containing protein	19.4	0	Pseudomonas asplenii
241	AF-H2J162-F1-model_v4 EF-hand domain-containing protein	19.8	0	Rahnella aquatilis CIP 78.65 = ATCC 33071
242	AF-S9QU80-F1-model_v4 Uncharacterized protein	12.9	0	Cystobacter fuscus DSM 2262
243	AF-A0A2N8EL20-F1-model_v4 Uncharacterized protein	16.3	0	Pseudomonas sp. FW305-131
244	AF-A0A3S5YGX0-F1-model_v4 Chitinase	15.4	0	Salmonella enterica subsp. arizonae serovar 18:z4,z23:- str. CVM N26626
245	AF-A0A379QKR5-F1-model_v4 Phage endolysin	17.3	0	Salmonella enterica
246	AF-A0A7Y8K5P0-F1-model_v4 Uncharacterized protein	18.6	0	Pseudomonas yamanorum
247	AF-A0A3W1E7B9-F1-model_v4 Uncharacterized protein	18.9	0	Salmonella enterica
248	AF-A0A379SG48-F1-model_v4 Phage-related lysozyme (Muraminidase)	16.7	0	Salmonella enterica
249	AF-A0A3S5YIP0-F1-model_v4 Uncharacterized protein	15	0	Salmonella enterica subsp. arizonae serovar 18:z4,z23:- str. CVM N26626
250	AF-A0A7X7I980-F1-model_v4 Peptidoglycan DD-metalloendopeptidase family protein	12.5	0	Fibrobacter sp.
251	AF-K8B3G2-F1-model_v4 EF-hand domain-containing protein	20.3	0	Cronobacter dublinensis 1210
252	AF-B6VN60-F1-model_v4 EF-hand domain-containing protein	14	0	Photorhabdus asymbiotica subsp. asymbiotica ATCC 43949
253	AF-A0A2R7Q9V7-F1-model_v4 Uncharacterized protein	64.9	0	Aeromonas sp. HMWF014
254	AF-A0A2N7W1U0-F1-model_v4 Uncharacterized protein	14.6	0	Trinickia soli
255	AF-A0A0U1KGM0-F1-model_v4 Predicted lysozyme (DUF847)	13.6	0	Yersinia mollaretii
256	AF-A0A1B7HR25-F1-model_v4 Uncharacterized protein	19.1	0	Buttiauxella noackiae ATCC 51607
257	AF-A0A6D2GAN1-F1-model_v4 Predicted lysozyme (DUF847)	18	0	Salmonella enterica subsp. salamae
258	AF-A0A8B4T9D7-F1-model_v4 Phage-related lysozyme (Muraminidase)	16.8	0	Klebsiella pneumoniae
259	AF-A0A4U2UEC6-F1-model_v4 Pesticin domain-containing protein	17.7	0	Martelella alba
260	AF-A0A7G6V2K4-F1-model_v4 Uncharacterized protein	14.4	0	Burkholderia cenocepacia
261	AF-A0A7Z2Z4D7-F1-model_v4 EF-hand domain-containing protein	87.1	0	Aeromonas hydrophila
262	AF-A0A6P2R1T4-F1-model_v4 Calcium-binding protein	18	0	Burkholderia lata
263	AF-A0A379S8V1-F1-model_v4 Phage lysozyme protein	20.3	0	Salmonella enterica subsp. arizonae
264	AF-A0A4Q3ZSL4-F1-model_v4 Hydroxyethylthiazole kinase	13.1	0	Alcaligenaceae bacterium
265	AF-A0A1Q9QX61-F1-model_v4 Uncharacterized protein	13.5	0	Pseudomonas putida
266	AF-A0A843SHU8-F1-model_v4 Uncharacterized protein	12.4	0	Rugamonas rivuli
267	AF-A0A4S0IZA3-F1-model_v4 N-acetylmuramidase family protein	14.6	0	bacterium M00.F.Ca.ET.191.01.1.1
268	AF-A0A0Q4MRZ0-F1-model_v4 EF-hand domain-containing protein	24.5	0	Serratia sp. Leaf51
269	AF-A0A2G6X112-F1-model_v4 Putative chitinase	14.2	0	Variovorax sp. 54
270	AF-G6F3J2-F1-model_v4 Uncharacterized protein	14.4	0	Commensalibacter intestini A911
271	AF-A0A0G2ZIR2-F1-model_v4 Muramidase (Phage lysozyme)	13.1	0	Archangium gephyra
272	AF-A0A515EUQ2-F1-model_v4 M23 family metallopeptidase	10.5	0	Rhodoferax sediminis
273	AF-A0A4U2U902-F1-model_v4 Uncharacterized protein	16.8	0	Martelella alba
274	AF-A0A0N9VWZ7-F1-model_v4 Uncharacterized protein	14.4	0	Acinetobacter equi
275	AF-A0A2Z6U981-F1-model_v4 Uncharacterized protein	26.4	0	Burkholderia vietnamiensis
276	AF-A0A379S8W2-F1-model_v4 Phage-related lysozyme (Muraminidase)	20.2	0	Salmonella enterica subsp. arizonae
277	AF-A0A808K2M3-F1-model_v4 Uncharacterized protein	17.2	0	Paraburkholderia caribensis
278	AF-A0A158DUE5-F1-model_v4 EF hand domain-containing protein	22.4	0	Caballeronia catudaia
279	AF-A0A3A9C7C1-F1-model_v4 Uncharacterized protein	11.8	0	bacterium C-53
280	AF-A0A2V8Q1G9-F1-model_v4 SH3b domain-containing protein	18.6	0	Acidobacteria bacterium
281	AF-A0A2V8PTD7-F1-model_v4 Non-specific serine/threonine protein kinase	16.2	0	Acidobacteria bacterium
282	AF-A0A2V8PFP6-F1-model_v4 SH3b domain-containing protein	17.4	0	Acidobacteria bacterium
283	AF-A0A2H1XN51-F1-model_v4 SH3b domain-containing protein	10.5	0	Tenacibaculum dicentrarchi
284	AF-A0A7T9J536-F1-model_v4 Non-specific serine/threonine protein kinase	17.4	0	Acidobacteria bacterium
285	AF-A0A7W1RAB2-F1-model_v4 SH3 domain-containing protein	17.4	0	Acidobacteria bacterium
286	AF-A0A0Q7X798-F1-model_v4 Uncharacterized protein	11.8	0	Duganella sp. Root1480D1
287	AF-A0A2T4U7M3-F1-model_v4 Uncharacterized protein	10.5	0	Alkalicoccus saliphilus
288	AF-A0A136KBV8-F1-model_v4 SH3b domain-containing protein	15.1	0	Acidobacteria bacterium OLB17
289	AF-A0A740VIV4-F1-model_v4 Uncharacterized protein	17.9	0	Salmonella enterica subsp. enterica serovar 6,7:c:1,5
290	AF-A0A7V9GC02-F1-model_v4 SH3 domain-containing protein	15.5	0	Acidobacteria bacterium
291	AF-A0A7W1ZYT2-F1-model_v4 SH3 domain-containing protein	16.6	0	Acidobacteria bacterium
292	AF-A0A7Z8PA17-F1-model_v4 SH3 domain-containing protein	14.4	0	Rhodobacteraceae bacterium
293	AF-A0A060BSK8-F1-model_v4 CAZy families GH73 protein	13.9	0	uncultured Bacillus sp.
294	AF-A0A2M9NTE7-F1-model_v4 D-alanyl-D-alanine carboxypeptidase	11.6	0	Bacillus sp. mrc49
295	AF-A0A6J5J4C6-F1-model_v4 Calcium-binding protein	25.5	0	Burkholderia aenigmatica
296	AF-A0A7V8VXG5-F1-model_v4 SH3 domain-containing protein	13.5	0	Chloroflexia bacterium
297	AF-A0A7W1CDA2-F1-model_v4 SH3 domain-containing protein	11	0	Acidobacteria bacterium
298	AF-A0A0A1FH76-F1-model_v4 Secretion activator protein	23.5	0	Collimonas arenae
299	AF-A0A2V8RNX3-F1-model_v4 Non-specific serine/threonine protein kinase	13.3	0	Acidobacteria bacterium
300	AF-A0A2V8QMK2-F1-model_v4 SH3b domain-containing protein	13.8	0	Acidobacteria bacterium
301	AF-A0A0Q4ND89-F1-model_v4 Lysozyme	21.5	0	Serratia sp. Leaf51
302	AF-A3IWE1-F1-model_v4 SH3b domain-containing protein	14.2	0	Crocosphaera chwakensis CCY0110
303	AF-T2IMB4-F1-model_v4 Uncharacterized protein	11.9	0	Crocosphaera watsonii WH 0005
304	AF-A0A831T5N2-F1-model_v4 Uncharacterized protein	13.4	0	Blastocatellia bacterium
305	AF-A0A737C652-F1-model_v4 Uncharacterized protein	14	0	Salmonella enterica subsp. arizonae serovar 18:z4,z32:-
306	AF-M0BGV4-F1-model_v4 N-acetylmuramyl-L-alanine amidase, negative regulator of AmpC, AmpD	10.8	0	Halovivax asiaticus JCM 14624
307	AF-A0A126ZF08-F1-model_v4 Uncharacterized protein	15.5	0	Variovorax sp. PAMC 28711
308	AF-A0A5C7JTL5-F1-model_v4 SH3b domain-containing protein	13.7	0	Thermomicrobiales bacterium
309	AF-A0A2V7L197-F1-model_v4 Uncharacterized protein	11.3	0	Gemmatimonadetes bacterium
310	AF-A0A2G7F7F9-F1-model_v4 Uncharacterized protein	6.4	0	Streptomyces sp. 70
311	AF-A0A3M1SQI4-F1-model_v4 SH3b domain-containing protein	19.7	0	Acidobacteria bacterium
312	AF-L0M8C9-F1-model_v4 Putative chitinase	25.9	0	Enterobacteriaceae bacterium strain FGI 57
313	AF-A0A850H2M4-F1-model_v4 Uncharacterized protein	14.7	0	Altererythrobacter lutimaris
314	AF-A0A6J4XKJ1-F1-model_v4 SH3b domain-containing protein	12.7	0	Olavius sp. associated proteobacterium Delta 1
315	AF-A0A838GH99-F1-model_v4 Protein kinase	11.7	0	Chloroflexia bacterium
316	AF-A0A6L9IUS5-F1-model_v4 Serine/threonine-protein phosphatase	10.7	0	Chloroflexi bacterium
317	AF-A0A831WSS0-F1-model_v4 SH3 domain-containing protein	13.9	0	Blastocatellia bacterium
318	AF-A0A4P6XGS0-F1-model_v4 SH3 domain-containing protein	16.6	0	Sphingomonas sp. AAP5
319	AF-A0A6J4H3C9-F1-model_v4 Protein kinase domain-containing protein	14.1	0	uncultured Chloroflexia bacterium
320	AF-A0A3J4QS28-F1-model_v4 Uncharacterized protein	16.5	0	Salmonella enterica
321	AF-A0A4P6YLD8-F1-model_v4 Uncharacterized protein	13.9	0	Xanthomonas oryzae pv. oryzae
322	AF-A0A897MXE4-F1-model_v4 N-acetylmuramoyl-L-alanine amidase	10.7	0	Natranaeroarchaeum sulfidigenes
323	AF-A0A2N6FQ02-F1-model_v4 EF-hand domain-containing protein	19.2	0	Arcobacter sp.
324	AF-A0A104ZBZ9-F1-model_v4 Uncharacterized protein	11.8	0	Burkholderia ubonensis
325	AF-A0A7W4RFV1-F1-model_v4 SH3-like domain-containing protein	10.2	0	Comamonas terrigena
326	AF-A0A7H8Q6D0-F1-model_v4 SH3 domain-containing protein	13.7	0	Planococcus glaciei
327	AF-A0A6B1DSB6-F1-model_v4 SH3 domain-containing protein	12.4	0	Caldilineaceae bacterium SB0662_bin_9
328	AF-A0A7X1TUM3-F1-model_v4 SH3 domain-containing protein	9.7	0	Betaproteobacteria bacterium
329	AF-A0A3M1RLR5-F1-model_v4 SH3 domain-containing protein	16	0	Nitrospinae bacterium
330	AF-A0A497YEF5-F1-model_v4 D-alanyl-D-alanine carboxypeptidase	16	0	Planococcus citreus
331	AF-A0A7X9J708-F1-model_v4 Protein kinase domain-containing protein	13.6	0	Anaerolineaceae bacterium
332	AF-A0A840S397-F1-model_v4 Uncharacterized protein	13.3	0	Inhella inkyongensis
333	AF-A0A1L8P9F6-F1-model_v4 Uncharacterized protein	11.9	0	Alkalibacterium sp. 20
334	AF-A0A3B1CD62-F1-model_v4 SH3b domain-containing protein	9	0	hydrothermal vent metagenome
335	AF-A0A351EVR3-F1-model_v4 LysM domain-containing protein	13.5	0	Acidimicrobiaceae bacterium
336	AF-A0A6L7XKT4-F1-model_v4 SH3 domain-containing protein	9	0	Rhodospirillales bacterium
337	AF-A0A7W3P7G9-F1-model_v4 Uncharacterized protein	11.7	0	Microlunatus kandeliicorticis
338	AF-A0A2W5HBB7-F1-model_v4 EF-hand domain-containing protein	19.1	0	Stenotrophomonas maltophilia
339	AF-A0A4R5KRP8-F1-model_v4 N-acetylmuramoyl-L-alanine amidase	12.3	0	Paenibacillus piri
340	AF-A0A838U5I5-F1-model_v4 Serine/threonine protein kinase	16.4	0	Blastocatellia bacterium
341	AF-A0A2Z6G869-F1-model_v4 Uncharacterized protein	13.8	0	Ferriphaselus amnicola
342	AF-A0A447ISC7-F1-model_v4 Bacterial SH3 domain protein	17.7	0	Paracoccus haematequi
343	AF-A0A0A1FJT4-F1-model_v4 Miscellaneous hypothetical	12	0	Collimonas arenae
344	AF-K1W4A3-F1-model_v4 NLP/P60 protein	15.4	0	Arthrospira platensis C1
345	AF-A0A0S8HUB4-F1-model_v4 SH3b domain-containing protein	15.2	0	bacterium SM23_31
346	AF-A0A1C6H8P4-F1-model_v4 Bifunctional autolysin	11.4	0	uncultured Clostridium sp.
347	AF-A0A6G9W9E4-F1-model_v4 SH3b domain-containing protein	15.4	0	Paracoccus sp. AK26
348	AF-T2NAP0-F1-model_v4 SH3 domain protein	12.1	0	Porphyromonas gingivalis JCVI SC001
349	AF-A0A6J4UZI8-F1-model_v4 Uncharacterized protein	11.2	0	uncultured Thermomicrobiales bacterium
350	AF-A0A3D2IPT8-F1-model_v4 Uncharacterized protein	12.9	0	Lachnospiraceae bacterium
351	AF-A0A644W4E3-F1-model_v4 Uncharacterized protein	12.5	0	bioreactor metagenome
352	AF-A0A2Z6BXI2-F1-model_v4 SH3b domain-containing protein	8.3	0	Enterococcus faecalis
353	AF-A0A7C3JTG4-F1-model_v4 SH3b domain-containing protein	15	0	Deltaproteobacteria bacterium
354	AF-A0A351AYS8-F1-model_v4 SH3 domain-containing protein	8.1	0	Desulfobacterales bacterium
355	AF-A0A7V9N0Q8-F1-model_v4 Peptidoglycan-binding protein	11.4	0	Alphaproteobacteria bacterium
356	AF-A0A7C4UVG6-F1-model_v4 Uncharacterized protein	12.1	0	Anaerolineae bacterium
357	AF-A0A2G3Q2J4-F1-model_v4 Uncharacterized protein	13.6	0	Lachnospiraceae bacterium
358	AF-A0A356V4C7-F1-model_v4 SH3b domain-containing protein	13	0	Rhodobacteraceae bacterium
359	AF-A0A5P3MRM2-F1-model_v4 SH3 domain-containing protein	9.1	0	Neisseria animalis
360	AF-A0A353CUY2-F1-model_v4 Peptide-binding protein	10.8	0	Elusimicrobia bacterium
361	AF-A0A1Q3RFP0-F1-model_v4 SH3b domain-containing protein	15.9	0	Clostridiales bacterium 38-18
362	AF-A0A1I5GLS9-F1-model_v4 NlpC/P60 family protein	8.2	0	Anaerocolumna aminovalerica
363	AF-I8J3B9-F1-model_v4 N-acetylmuramoyl-L-alanine amidase	12	0	Fictibacillus macauensis ZFHKF-1
364	AF-A0A2N6ATY6-F1-model_v4 SH3b domain-containing protein	12.7	0	Clostridiales bacterium
365	AF-A0A371S019-F1-model_v4 LYZ2 domain-containing protein	16	0	Bacillus sp. HNG
366	AF-A0A328TZD6-F1-model_v4 Uncharacterized protein	10.6	0	Paenibacillus montanisoli
367	AF-K2CL96-F1-model_v4 Uncharacterized protein	13.6	0	uncultured bacterium
368	AF-A0A254N0K3-F1-model_v4 Uncharacterized protein	14.2	0	Pelomonas puraquae
369	AF-A0A1H8YUL9-F1-model_v4 Uncharacterized protein	15.5	0	Pseudomonas lutea
370	AF-A0A645CZ87-F1-model_v4 Uncharacterized protein	10.9	0	bioreactor metagenome
371	AF-A0A1K1QMZ2-F1-model_v4 Cell wall-associated hydrolase, NlpC family	11.3	0	Paenibacillus sp. UNCCL117
372	AF-A0A2M8Q2Y1-F1-model_v4 SH3b domain-containing protein	10	0	Phototrophicales bacterium
373	AF-A0A845GN66-F1-model_v4 SH3 domain-containing protein	15.2	0	Duganella vulcania
374	AF-A0A0C5JC36-F1-model_v4 Uncharacterized protein	9.5	0	Rugosibacter aromaticivorans
375	AF-A0A661BKE2-F1-model_v4 SH3b domain-containing protein	10.7	0	Gammaproteobacteria bacterium
376	AF-A0A2U2BWA7-F1-model_v4 Uncharacterized protein	12.6	0	Marinicauda salina
377	AF-A0A2R6JR74-F1-model_v4 N-acetylmuramoyl-L-alanine amidase	12.6	0	Halobacteriales archaeon QS_8_69_26
378	AF-A0A2G6FTY5-F1-model_v4 SH3b domain-containing protein	10.8	0	Deltaproteobacteria bacterium
379	AF-A0A352JPJ0-F1-model_v4 Uncharacterized protein	10	0	candidate division Zixibacteria bacterium
380	AF-A0A1H6GQG3-F1-model_v4 SH3 domain-containing protein	11.5	0	Magnetospirillum fulvum
381	AF-A0A2V7KDF7-F1-model_v4 Beta_helix domain-containing protein	11.8	0	Gemmatimonadetes bacterium
382	AF-A0A812KVI3-F1-model_v4 Hypothetical protein	11.5	0	Symbiodinium natans
383	AF-A0A1H4N811-F1-model_v4 SH3 domain-containing protein	13.8	0	Rhodobacter sp. 24-YEA-8
384	AF-E1ICP5-F1-model_v4 SH3 type 3 domain-containing protein	11.3	0	Oscillochloris trichoides DG-6
385	AF-A0A2N2EGM8-F1-model_v4 Uncharacterized protein	11.2	0	Firmicutes bacterium HGW-Firmicutes-1
386	AF-A0A4R0YLQ5-F1-model_v4 Curli production assembly/transport component CsgG	13.9	0	Dyella soli
387	AF-A0A231RR77-F1-model_v4 Hydrolase Nlp/P60	12.7	0	Cohnella sp. CIP 111063
388	AF-A0A0U4E5J8-F1-model_v4 SH3b domain-containing protein	11.3	0	Lentibacillus amyloliquefaciens
389	AF-F2NYD8-F1-model_v4 SH3b domain-containing protein	12.2	0	Treponema succinifaciens DSM 2489
390	AF-S9ZJQ0-F1-model_v4 Uncharacterized protein	9.7	0	Thauera terpenica 58Eu
391	AF-A0A6I1QG31-F1-model_v4 SH3 domain-containing protein	13	0	Vibrio sp. B1Z05
392	AF-A0A7W1DXH2-F1-model_v4 SH3 domain-containing protein	17.4	0	Chloroflexia bacterium
393	AF-A0A844ZCN4-F1-model_v4 Uncharacterized protein	14.7	0	Parapontixanthobacter aurantiacus
394	AF-A0A2A8MH91-F1-model_v4 Cell wall-binding protein	16.1	0	Bacillus sp. AFS001701
395	AF-A0A4R6RIL8-F1-model_v4 Uncharacterized protein	11.3	0	Aquabacterium commune
396	AF-A0A813FBF0-F1-model_v4 Hypothetical protein	14.7	0	Polarella glacialis
397	AF-A0A1H9GNF3-F1-model_v4 Uncharacterized protein	9.2	0	Treponema bryantii
398	AF-A0A4V2Z7Q4-F1-model_v4 SH3 domain-containing protein	15.2	0	Antarcticimicrobium sediminis
399	AF-A0A845CU74-F1-model_v4 SH3 domain-containing protein	10.4	0	Caldilineaceae bacterium SB0662_bin_25
400	AF-A0A653J1E5-F1-model_v4 Uncharacterized protein	13.1	0	Novosphingobium sp. 9U
401	AF-A0A7V3UHX2-F1-model_v4 SH3b domain-containing protein	15.8	0	bacterium
402	AF-A0A3G5HRB2-F1-model_v4 Uncharacterized protein	11.2	0	Propionibacterium acidifaciens
403	AF-A0A812PD46-F1-model_v4 Hypothetical protein	12.3	0	Symbiodinium sp. CCMP2592
404	AF-R0BZZ3-F1-model_v4 SH3b domain-containing protein	15.7	0	Enterocloster bolteae 90A9
405	AF-A0A1R1I295-F1-model_v4 Uncharacterized protein	9.1	0	Azonexus hydrophilus
406	AF-A0A7G1GZS7-F1-model_v4 SH3b domain-containing protein	7	0	Dissulfurispira thermophila
407	AF-A0A4U8RY23-F1-model_v4 SH3b domain-containing protein	13.1	0	Helicobacter typhlonius
408	AF-A0A178M552-F1-model_v4 Ligand-binding protein SH3	11.3	0	Chloroflexus islandicus
409	AF-A0A348N5I7-F1-model_v4 SH3b domain-containing protein	12	0	Lachnospiraceae bacterium
410	AF-A0A1S9BVG9-F1-model_v4 SH3b domain-containing protein	9.5	0	Oribacterium sp. C9
411	AF-A0A099GBV6-F1-model_v4 Uncharacterized protein	10.7	0	Paracoccus sanguinis
412	AF-A0A2E4A2J9-F1-model_v4 Uncharacterized protein	9.6	0	Candidatus Marinimicrobia bacterium
413	AF-A0A7Z8YPF8-F1-model_v4 Chaperone protein DnaJ	14.1	0	Bergeyella zoohelcum
414	AF-A0A2V9LAW5-F1-model_v4 Uncharacterized protein	14.8	0	Acidobacteria bacterium
415	AF-A0A7W0S603-F1-model_v4 SH3 domain-containing protein	12.9	0	Chloroflexia bacterium
416	AF-A0A2V7L188-F1-model_v4 Uncharacterized protein	8.9	0	Gemmatimonadetes bacterium
417	AF-A0A3M1YD68-F1-model_v4 Uncharacterized protein	12.2	0	Bacteroidetes bacterium
418	AF-A0A7S2HAX7-F1-model_v4 Hypothetical protein	10	0	Alexandrium andersonii
419	AF-A0A4Q3DNQ8-F1-model_v4 SH3 domain-containing protein	8.6	0	Hyphomicrobiales bacterium
420	AF-A0A6M2BWN1-F1-model_v4 Uncharacterized protein	11	0	Solimonas terrae
421	AF-A0A2V9FGK1-F1-model_v4 SH3b domain-containing protein	14.5	0	Acidobacteria bacterium
422	AF-N6YG11-F1-model_v4 Uncharacterized protein	7.5	0	Thauera linaloolentis 47Lol = DSM 12138
423	AF-A0A2E7BU14-F1-model_v4 Uncharacterized protein	13	0	Myxococcales bacterium
424	AF-A0A6L9IUF1-F1-model_v4 SH3 domain-containing protein	10.5	0	Chloroflexi bacterium
425	AF-A0A2R7L7D9-F1-model_v4 SH3b domain-containing protein	16.1	0	Caulobacter sp. HMWF025
426	AF-A0A6M0IDQ9-F1-model_v4 DnaJ domain-containing protein	8.9	0	Spirosoma agri
427	AF-A0A3D1E9P2-F1-model_v4 Ion channel protein	11.3	0	Flavobacteriaceae bacterium
428	AF-W7ZMW5-F1-model_v4 SH3b domain-containing protein	9.4	0	Bacillus sp. JCM 19047
429	AF-A0A329KSB1-F1-model_v4 Uncharacterized protein	7.7	0	Paenibacillus sp. YN15
430	AF-A0A1I5UL46-F1-model_v4 SH3 domain-containing protein	16.3	0	Lachnospiraceae bacterium XBB1006
431	AF-A0A3S1AI16-F1-model_v4 PPM-type phosphatase domain-containing protein	15.1	0	Calothrix desertica PCC 7102
432	AF-A0A7S1B0F5-F1-model_v4 Hypothetical protein	13.9	0	Noctiluca scintillans
433	AF-A0A0F9KHA1-F1-model_v4 SH3b domain-containing protein	8.6	0	marine sediment metagenome
434	AF-A0A1Q9LKR9-F1-model_v4 Uncharacterized protein	8.9	0	Actinokineospora bangkokensis
435	AF-A0A3D5T073-F1-model_v4 Uncharacterized protein	8.6	0	Rhodocyclaceae bacterium
436	AF-A0A3M1TG86-F1-model_v4 SH3 domain-containing protein	9.8	0	Cyanobacteria bacterium J055
437	AF-A0A7Y8STV0-F1-model_v4 SH3 domain-containing protein	11.6	0	Hydrogenophilaceae bacterium
438	AF-A0A1Y3C7M3-F1-model_v4 Uncharacterized protein	10.3	0	Acinetobacter sp. ANC 3903
439	AF-A0A0R1WXL1-F1-model_v4 N-acetylmuramoyl-L-alanine amidase	11.4	0	Ligilactobacillus hayakitensis DSM 18933 = JCM 14209
440	AF-A0A7S2IYD3-F1-model_v4 Hypothetical protein	15.2	0	Alexandrium andersonii
441	AF-A0A2M8RTE1-F1-model_v4 Uncharacterized protein	12	0	Caviibacterium pharyngocola
442	AF-A0A3D2JJL4-F1-model_v4 GH18 domain-containing protein	9	0	Lachnospiraceae bacterium
443	AF-A0A836TBG1-F1-model_v4 NUDIX domain-containing protein	13.7	0	Chromatiaceae bacterium
444	AF-A0A5R9GPF8-F1-model_v4 SH3b domain-containing protein	11.7	0	Mariprofundus erugo
445	AF-A0A2R6G7A9-F1-model_v4 Uncharacterized protein	8.9	0	Halobacteriales archaeon QS_1_68_20
446	AF-A0A840SGW6-F1-model_v4 Uncharacterized protein YgiM (DUF1202 family)	15.2	0	Treponema rectale
447	AF-A0A160TPJ9-F1-model_v4 Uncharacterized protein	14.1	0	hydrothermal vent metagenome
448	AF-A0A511AS69-F1-model_v4 Uncharacterized protein	9.3	0	Alkalibacterium kapii
449	AF-A0A564WD70-F1-model_v4 Uncharacterized protein	7.6	0	Candidatus Defluviicoccus seviourii
450	AF-A0A1M5SGA6-F1-model_v4 SH3b domain-containing protein	14.6	0	Tepidibacter thalassicus DSM 15285
451	AF-A0A7S1PID9-F1-model_v4 Hypothetical protein	12.8	0	Alexandrium catenella
452	AF-M6G566-F1-model_v4 SH3b domain-containing protein	26.7	0	Leptospira interrogans str. 2006001854
453	AF-A0A1Q7TH32-F1-model_v4 SH3b domain-containing protein	12.1	0	Gemmatimonadetes bacterium 13_1_20CM_4_66_11
454	AF-A0A0P9EBU6-F1-model_v4 SH3-like domain-containing protein	8.1	0	Thiohalorhabdus denitrificans
455	AF-V5FKU3-F1-model_v4 Uncharacterized protein	12.7	0	Vibrio halioticoli NBRC 102217
456	AF-A0A7S4VH77-F1-model_v4 Hypothetical protein	9.6	0	Alexandrium monilatum
457	AF-A0A4V6HYJ5-F1-model_v4 SH3b domain-containing protein	14.2	0	Helicobacter sp. MIT 05-5293
458	AF-S3K1G0-F1-model_v4 Uncharacterized protein	13.5	0	Treponema maltophilum ATCC 51939
459	AF-A0A520E178-F1-model_v4 Ligand-binding protein SH3	10.5	0	Variovorax sp.
460	AF-A0A3R6TU91-F1-model_v4 Uncharacterized protein	9.5	0	Clostridium sp. AF12-19
461	AF-A0A844WUA6-F1-model_v4 Uncharacterized protein	10.5	0	Gilliamella sp. Pas-s27
462	AF-A0A812ULJ6-F1-model_v4 STOML2 protein	14.2	0	Symbiodinium sp. CCMP2592
463	AF-A0A812YRP3-F1-model_v4 Hypothetical protein	11.5	0	Symbiodinium sp. CCMP2456
464	AF-A0A7S1AGW5-F1-model_v4 Hypothetical protein	10.3	0	Noctiluca scintillans
465	AF-A0A4Q3DTW1-F1-model_v4 SH3 domain-containing protein	14.4	0	Hyphomicrobiales bacterium
466	AF-A0A7T9ECQ4-F1-model_v4 Uncharacterized protein	15.1	0	Fibrobacteres bacterium
467	AF-A0A346QWK2-F1-model_v4 Nlp p60 protein	13.6	0	uncultured bacterium
468	AF-A0A6B0H4E0-F1-model_v4 SH3 domain-containing protein	10.4	0	Saccharibacillus sp. WB 17
469	AF-A0A2G6FGN6-F1-model_v4 SH3b domain-containing protein	11	0	Desulfobacterales bacterium
470	AF-A0A4R0PKP3-F1-model_v4 Type VI secretion system protein TssA	15.6	0	Pseudomonas sp. IC_126
471	AF-M1YM91-F1-model_v4 Uncharacterized protein	11.6	0	Nitrospina gracilis 3/211
472	AF-A0A2A7UUW6-F1-model_v4 Peptide-binding protein	12.2	0	Comamonas terrigena
473	AF-A0A4R2VRW4-F1-model_v4 Uncharacterized protein	14	0	Niastella sp. CF465
474	AF-A0A534S358-F1-model_v4 SH3 domain-containing protein	12.7	0	Deltaproteobacteria bacterium
475	AF-A0A7Y2SSF3-F1-model_v4 SH3 domain-containing protein	14.1	0	Chloroflexales bacterium ZM16-3
476	AF-R6CA66-F1-model_v4 Uncharacterized protein	10.3	0	Clostridium sp. CAG:510
477	AF-A0A838UQH2-F1-model_v4 Uncharacterized protein	11.8	0	Ktedonobacterales bacterium
478	AF-E8N102-F1-model_v4 Uncharacterized protein	14.9	0	Anaerolinea thermophila UNI-1
479	AF-A0A7S1MU02-F1-model_v4 Hypothetical protein	9.2	0	Alexandrium catenella
480	AF-A0A3D2GZT2-F1-model_v4 Uncharacterized protein	10.5	0	Clostridiales bacterium
481	AF-A0A812L040-F1-model_v4 STOML2 protein	10.8	0	Symbiodinium natans
482	AF-A0A849MHA0-F1-model_v4 SH3 domain-containing protein	11.4	0	Proteobacteria bacterium
483	AF-A0A5N7J2I3-F1-model_v4 SH3 domain-containing protein	11.9	0	Clostridium estertheticum
484	AF-A0A849YZP5-F1-model_v4 SH3 domain-containing protein	9.9	0	Polyangiaceae bacterium
485	AF-A0A1Z9SEX5-F1-model_v4 NlpC/P60 domain-containing protein	10.7	0	Rhodospirillaceae bacterium TMED256
486	AF-E7GEP5-F1-model_v4 Uncharacterized protein	7.5	0	Coprobacillus cateniformis
487	AF-A0A7C2PFK9-F1-model_v4 SH3 domain-containing protein	10.1	0	Spirochaetes bacterium
488	AF-A0A7S1RQP7-F1-model_v4 Hypothetical protein	10	0	Alexandrium catenella
489	AF-A3IYE7-F1-model_v4 SH3b domain-containing protein	7.1	0	Crocosphaera chwakensis CCY0110
490	AF-A0A3N1HNW9-F1-model_v4 Uncharacterized protein	14	0	Streptomyces sp. PanSC9
491	AF-A0A0D5A037-F1-model_v4 SH3 type 3 domain-containing protein	10.9	0	Ochrobactrum sp. LM19
492	AF-A0A7C9P2P3-F1-model_v4 Uncharacterized protein	11.5	0	Sulfuriferula multivorans
493	AF-A0A3M1C5S4-F1-model_v4 Uncharacterized protein	9.5	0	Bdellovibrio sp.
494	AF-G4CVM6-F1-model_v4 SH3b domain-containing protein	12.7	0	Cutibacterium avidum ATCC 25577
495	AF-A0A2T5K2L6-F1-model_v4 SH3-like domain-containing protein	6	0	Nitrosospira sp. Nsp2
496	AF-A0A0Q7I513-F1-model_v4 Ligand-binding protein SH3	10.9	0	Variovorax sp. Root434
497	AF-A0A813LWA7-F1-model_v4 Hypothetical protein	7	0	Polarella glacialis
498	AF-D3EDZ5-F1-model_v4 NLP/P60 protein	13.2	0	Paenibacillus sp. Y412MC10
499	AF-A0A536TWX5-F1-model_v4 SH3b domain-containing protein	10.9	0	Betaproteobacteria bacterium
500	AF-A0A4Q0U6Y5-F1-model_v4 NlpC/P60 domain-containing protein	9.8	0	Candidatus Amulumruptor caecigallinarius
501	AF-A0A7W1TN07-F1-model_v4 C40 family peptidase	9.2	0	Herpetosiphonaceae bacterium
502	AF-A0A1Q6SRG6-F1-model_v4 Uncharacterized protein	14.7	0	Roseburia sp. CAG:10041_57
503	AF-A0A6A5BXB1-F1-model_v4 SH3b domain-containing protein	7.6	0	Naegleria fowleri
504	AF-A0A7S4T4T8-F1-model_v4 Hypothetical protein	12.3	0	Alexandrium monilatum
505	AF-A0A1Q8QDJ4-F1-model_v4 Uncharacterized protein	16.5	0	Desulfovibrio sp. DV
506	AF-A0A3E1DID4-F1-model_v4 Uncharacterized protein	14.6	0	Candidatus Nitrotoga sp. SPKER
507	AF-A0A812W9S7-F1-model_v4 STOML2 protein	11	0	Symbiodinium sp. CCMP2456
508	AF-I4B0Y6-F1-model_v4 Uncharacterized protein	7.3	0	Turneriella parva DSM 21527
509	AF-A0A661WR21-F1-model_v4 SH3b domain-containing protein	12.4	0	Chloroflexi bacterium
510	AF-J8GGJ5-F1-model_v4 SH3b domain-containing protein	9.8	0	Bacillus cereus MSX-D12
511	AF-A0A4V6I468-F1-model_v4 SH3b domain-containing protein	11.6	0	Helicobacter japonicus
512	AF-A0A7S1QHN2-F1-model_v4 Hypothetical protein	9.2	0	Alexandrium catenella
513	AF-A0A2E9AN17-F1-model_v4 SH3b domain-containing protein	9.6	0	Salinisphaera sp.
514	AF-C0EHW9-F1-model_v4 Glycosyl hydrolase family 25	9.4	0	[Clostridium] methylpentosum DSM 5476
515	AF-A0A1G9FK35-F1-model_v4 Cell wall-associated hydrolase, NlpC family	13	0	Paenibacillus typhae
516	AF-B6IWB1-F1-model_v4 SH3b domain-containing protein	12	0	Rhodospirillum centenum SW
517	AF-A0A268RVC0-F1-model_v4 Uncharacterized protein	9.9	0	Alkalihalobacillus clausii
518	AF-A0A3N9UWN0-F1-model_v4 SH3b domain-containing protein	12.5	0	Methanothrix sp.
519	AF-E1ZIE4-F1-model_v4 SH3b domain-containing protein	14.5	0	Chlorella variabilis
520	AF-A0A6B4KH23-F1-model_v4 SH3 domain-containing protein	11.1	0	Clostridium botulinum
521	AF-A0A1W6MZG0-F1-model_v4 SH3b domain-containing protein	8	0	Methylocystis bryophila
522	AF-A0A2M8U5C8-F1-model_v4 Uncharacterized protein	10.6	0	Ferrovibrio sp.
523	AF-A0A4Q5RH70-F1-model_v4 SH3 domain-containing protein	10.7	0	Cytophagaceae bacterium
524	AF-A0A7X0E3Q0-F1-model_v4 Uncharacterized protein YraI	15.8	0	Rhodanobacter sp. MP1X3
525	AF-A0A7X8F336-F1-model_v4 Uncharacterized protein	14.7	0	Treponema sp.
526	AF-A0A1X7LW17-F1-model_v4 Cell wall-associated hydrolase, NlpC family	11.1	0	Paenibacillus aquistagni
527	AF-A0A7S0B6U2-F1-model_v4 Hypothetical protein	11.4	0	Pyrodinium bahamense
528	AF-R7MCW5-F1-model_v4 Dockerin type I repeat protein	9.3	0	Clostridium sp. CAG:628
529	AF-A0A812H8V8-F1-model_v4 Ttc4 protein	13.3	0	Symbiodinium sp. CCMP2456
530	AF-A0A364JZ10-F1-model_v4 Uncharacterized protein YraI	12.5	0	Falsochrobactrum ovis
531	AF-A0A0M9E8P7-F1-model_v4 SH3, type 3 domain protein	13.4	0	Candidatus Magnetomorum sp. HK-1
532	AF-A0A3P3RA12-F1-model_v4 Uncharacterized protein	12.4	0	Halomarina oriensis
533	AF-A0A377JLF0-F1-model_v4 Bacterial SH3 domain	11.6	0	Helicobacter canis
534	AF-A0A1S2UXG5-F1-model_v4 SH3b domain-containing protein	10.5	0	Pseudomonas costantinii
535	AF-A0A084SGA4-F1-model_v4 Uncharacterized protein	10.8	0	Archangium violaceum Cb vi76
536	AF-R7QW32-F1-model_v4 Bacterial SH3 domain	10.9	0	Roseburia sp. CAG:182
537	AF-A0A2N6BYY7-F1-model_v4 SH3b domain-containing protein	10.8	0	Desulfobulbaceae bacterium
538	AF-A0A2H5ZPP9-F1-model_v4 SH3b domain-containing protein	13	0	bacterium HR30
539	AF-A0A812SE78-F1-model_v4 Pkd2 protein	9.6	0	Symbiodinium pilosum
540	AF-A0A1A9NLG7-F1-model_v4 Uncharacterized protein	14.6	0	Methylobacillus sp. MM3
541	AF-A0A855KWT0-F1-model_v4 Enterotoxin	9.9	0	Bacillus sp. AKBS9
542	AF-A0A836WVM9-F1-model_v4 SH3 domain-containing protein	13.2	0	Thiotrichaceae bacterium
543	AF-A0A2P1VC11-F1-model_v4 Ligand-binding protein SH3	9.7	0	Variovorax sp. PMC12
544	AF-A0A6B1DWR4-F1-model_v4 SH3 domain-containing protein	10.7	0	Caldilineaceae bacterium SB0662_bin_9
545	AF-A0A3N4N2H2-F1-model_v4 GIY-YIG nuclease family protein	15	0	Neisseria sp. 10009
546	AF-A0A2V9V4W3-F1-model_v4 SH3b domain-containing protein	13	0	Acidobacteria bacterium
547	AF-A0A2G2ATW9-F1-model_v4 EF-hand domain-containing protein	15.9	0	Sulfurimonas sp.
548	AF-A0A5C4ZL24-F1-model_v4 Enterotoxin	10.1	0	Bacillus pacificus
549	AF-E6XBY3-F1-model_v4 CHAP domain containing protein	21.1	0	Cellulophaga algicola DSM 14237
550	AF-A0A7X1NSV4-F1-model_v4 Excalibur domain-containing protein	7.8	0	Deinococcus terrestris
551	AF-A0A7C4L467-F1-model_v4 Uncharacterized protein	11.3	0	Spirochaetes bacterium
552	AF-A0A1H5DJ53-F1-model_v4 Uncharacterized protein	10.3	0	Amycolatopsis tolypomycina
553	AF-A0A537CQ40-F1-model_v4 SH3 domain-containing protein	4.7	0	Betaproteobacteria bacterium
554	AF-A0A2W6W144-F1-model_v4 SH3 domain-containing protein	7.4	0	Thauera sp.
555	AF-A0A523N2R2-F1-model_v4 SH3 domain-containing protein	14.5	0	Nitrospina sp.
556	AF-A0A437LA83-F1-model_v4 SH3 domain-containing protein	15.3	0	Rhodobacteraceae bacterium CCMM004
557	AF-A0A015NN06-F1-model_v4 N-acetylmuramoyl-L-alanine amidase	11	0	Paenibacillus darwinianus
558	AF-W6K6L5-F1-model_v4 Uncharacterized protein	9.4	0	Magnetospira sp. QH-2
559	AF-A0A813ES10-F1-model_v4 Hypothetical protein	10.3	0	Polarella glacialis
560	AF-A0A359EIJ5-F1-model_v4 SH3b domain-containing protein	11.6	0	Chloroflexi bacterium
561	AF-A0A800M8R4-F1-model_v4 SH3b domain-containing protein	15.2	0	Candidatus Lambdaproteobacteria bacterium
562	AF-A0A2H2WVA6-F1-model_v4 Enterotoxin	11.5	0	Bacillus cereus
563	AF-A0A7V7XK07-F1-model_v4 Uncharacterized protein	11.5	0	Anaerolineae bacterium
564	AF-A0A3D4UGQ6-F1-model_v4 Ligand-binding protein SH3	9.3	0	Moraxellaceae bacterium
565	AF-A0A7S1WSF0-F1-model_v4 Hypothetical protein	10.6	0	Alexandrium catenella
566	AF-A0A264DU99-F1-model_v4 Hydrolase	14.9	0	Paenibacillus odorifer
567	AF-A0A7C3JKJ2-F1-model_v4 SH3 domain-containing protein	15.5	0	Deltaproteobacteria bacterium
568	AF-A0A2K1EEN9-F1-model_v4 Uncharacterized protein	10.5	0	Paenibacillus sp. F4
569	AF-C5CX27-F1-model_v4 SH3 type 3 domain protein	12	0	Variovorax paradoxus S110
570	AF-A0A5C1M8F8-F1-model_v4 Uncharacterized protein	14.6	0	Geobacter sp. FeAm09
571	AF-A0A6L4AA09-F1-model_v4 SUMF1/EgtB/PvdO family nonheme iron enzyme	11.5	0	Anaerolineae bacterium
572	AF-A0A259KWG1-F1-model_v4 SH3b domain-containing protein	13.2	0	Rhizobiales bacterium 39-66-18
573	AF-A0A2N4XL50-F1-model_v4 SH3b domain-containing protein	8.6	0	Uliginosibacterium sp. TH139
574	AF-A0A2N7QPG9-F1-model_v4 SH3b domain-containing protein	13.7	0	Dyella sp. AD56
575	AF-A0A6M8HVL5-F1-model_v4 SH3 domain-containing protein	14.9	0	Lichenicola cladoniae
576	AF-A0A4Y8QAB3-F1-model_v4 Uncharacterized protein	14.1	0	Paenibacillus athensensis
577	AF-A0A7X6X4P0-F1-model_v4 C40 family peptidase	9.8	0	Clostridiaceae bacterium
578	AF-A0A329KM62-F1-model_v4 Hydrolase Nlp/P60	12.1	0	Paenibacillus sp. YN15
579	AF-A0A0G1N8I9-F1-model_v4 Uncharacterized protein	12.8	0	Parcubacteria group bacterium GW2011_GWF2_44_8b
580	AF-B9IR39-F1-model_v4 Enterotoxin / cell-wall binding protein	9.9	0	Bacillus cereus Q1
581	AF-A0A3N5RP76-F1-model_v4 Uncharacterized protein	13.7	0	Chloroflexi bacterium
582	AF-A0A840YBY4-F1-model_v4 Uncharacterized protein	17.1	0	Sphingomonas xinjiangensis
583	AF-A0A1M3KQP1-F1-model_v4 SH3b domain-containing protein	10.2	0	Devosia sp. 66-22
584	AF-W8YYW4-F1-model_v4 SH3b domain-containing protein	13.8	0	Paenibacillus sp. P22
585	AF-A0A813DCY5-F1-model_v4 Hypothetical protein	7.6	0	Polarella glacialis
586	AF-A0A382HWC6-F1-model_v4 SH3b domain-containing protein	12	0	marine metagenome
587	AF-A0A6B1E156-F1-model_v4 SH3 domain-containing protein	14.7	0	Chloroflexi bacterium
588	AF-A0A3N5LB54-F1-model_v4 Uncharacterized protein	16.7	0	Chloroflexi bacterium
589	AF-A0A1A6KNT2-F1-model_v4 SH3b domain-containing protein	12.2	0	Vibrio sp. UCD-FRSSP16_10
590	AF-A0A2N5K0Y5-F1-model_v4 SH3b domain-containing protein	13	0	Chloroflexi bacterium
591	AF-A0A3A9CBR4-F1-model_v4 SH3 domain-containing protein	11.2	0	bacterium C-53
592	AF-Q2RX13-F1-model_v4 Heat shock protein DnaJ-like	11.6	0	Rhodospirillum rubrum ATCC 11170
593	AF-A0A7S4QN38-F1-model_v4 Hypothetical protein	11.1	0	Alexandrium monilatum
594	AF-A0A813LKM7-F1-model_v4 Hypothetical protein	8.5	0	Polarella glacialis
595	AF-A0A7S1PJG8-F1-model_v4 Hypothetical protein	6.1	0	Alexandrium catenella
596	AF-H8H2C2-F1-model_v4 Putative lipoprotein	10.8	0	Deinococcus gobiensis I-0
597	AF-A0A4Q6BMW2-F1-model_v4 SH3 domain-containing protein	17.3	0	Proteobacteria bacterium
598	AF-A0A417DKM3-F1-model_v4 SH3 domain-containing protein	10.3	0	Ruminococcus sp. AM36-17
599	AF-A0A7S1RG63-F1-model_v4 Hypothetical protein	12	0	Alexandrium catenella
600	AF-A0A383BPH8-F1-model_v4 Uncharacterized protein	15.9	0	marine metagenome
601	AF-A0A2H0SG33-F1-model_v4 Uncharacterized protein	10.8	0	Parcubacteria group bacterium CG10_big_fil_rev_8_21_14_0_10_38_31
602	AF-A0A4Q0J894-F1-model_v4 Uncharacterized protein	10.1	0	Muribaculaceae bacterium Isolate-013 (NCI)
603	AF-A0A496W6X0-F1-model_v4 SH3b domain-containing protein	13.6	0	Gammaproteobacteria bacterium
604	AF-A0A7X8VZI5-F1-model_v4 Dockerin domain-containing protein	12.3	0	Clostridiaceae bacterium
605	AF-A0A1C4WKT2-F1-model_v4 Uncharacterized protein	12.3	0	Micromonospora echinospora
606	AF-H3SM09-F1-model_v4 Uncharacterized protein	15.6	0	Paenibacillus dendritiformis C454
607	AF-A0A853VIW2-F1-model_v4 Ligand-binding protein SH3	14.6	0	Mesorhizobium sp. LCM 4577
608	AF-S9Q9M8-F1-model_v4 SH3b domain-containing protein	11.3	0	Salipiger mucosus DSM 16094
609	AF-A0A7W8EMB5-F1-model_v4 Uncharacterized protein YraI	12.8	0	Pseudochrobactrum saccharolyticum
610	AF-A0A2Y9ADP2-F1-model_v4 SH3 domain-containing protein	13.4	0	Jannaschia seohaensis
611	AF-A0A0F7JYD6-F1-model_v4 Uncharacterized protein	11.1	0	Sedimenticola thiotaurini
612	AF-A0A2B8HVK1-F1-model_v4 Enterotoxin	9.4	0	Bacillus anthracis
613	AF-A0A559KDK8-F1-model_v4 NlpC/P60 family protein	8.7	0	Paenibacillus sp. JC52
614	AF-A0A2N1T019-F1-model_v4 SH3b domain-containing protein	12.7	0	Spirochaetae bacterium HGW-Spirochaetae-10
615	AF-A0A136KSS8-F1-model_v4 Uncharacterized protein	15.5	0	Chloroflexi bacterium OLB15
616	AF-A0A329LEG1-F1-model_v4 MurNAc-LAA domain-containing protein	9.2	0	Paenibacillus sp. YN15
617	AF-A0A3M1IK13-F1-model_v4 SH3b domain-containing protein	13.7	0	Verrucomicrobia bacterium
618	AF-A0A7V9N1P8-F1-model_v4 N-acetylmuramoyl-L-alanine amidase	9.6	0	Chloroflexia bacterium
619	AF-A0A7S1F706-F1-model_v4 Hypothetical protein	8.7	0	Noctiluca scintillans
620	AF-A0A0L0DM35-F1-model_v4 Uncharacterized protein	12.1	0	Thecamonas trahens ATCC 50062
621	AF-A0A849I8T4-F1-model_v4 Uncharacterized protein	6.5	0	Burkholderiales bacterium
622	AF-A0A4R1BEI4-F1-model_v4 SH3 domain-containing protein	15.5	0	Parasulfuritortus cantonensis
623	AF-A0A7S4E577-F1-model_v4 Hypothetical protein	13	0	Pelagomonas calceolata
624	AF-A0A2V9E388-F1-model_v4 SH3b domain-containing protein	13.3	0	Acidobacteria bacterium
625	AF-A0A1H4H493-F1-model_v4 Uncharacterized conserved protein YraI	13.3	0	Paraburkholderia sartisoli
626	AF-A0A3M0XLC1-F1-model_v4 Peptidase P60	10.2	0	Alphaproteobacteria bacterium
627	AF-A0A250JL17-F1-model_v4 Uncharacterized protein	12.9	0	Cystobacter fuscus
628	AF-A0A7Y1V8Y6-F1-model_v4 C40 family peptidase	8.6	0	Saprospiraceae bacterium
629	AF-A0A416JLC0-F1-model_v4 Uncharacterized protein	9.1	0	Clostridium sp. AM49-4BH
630	AF-A0A1I0MS96-F1-model_v4 Metal-dependent hydrolase, beta-lactamase superfamily II	9.4	0	Roseivirga pacifica
631	AF-A0A6L3EU07-F1-model_v4 DUF3380 domain-containing protein	7.8	0	Chloroflexi bacterium
632	AF-A0A5C0SAR0-F1-model_v4 SH3 domain-containing protein	12.7	0	Crassaminicella thermophila
633	AF-A0A554KUL1-F1-model_v4 Uncharacterized protein	14.4	0	Parcubacteria group bacterium Gr01-1014_13
634	AF-A0A7S0ZSN2-F1-model_v4 Hypothetical protein	8.2	0	Noctiluca scintillans
635	AF-A0A484HKN5-F1-model_v4 Uncharacterized protein	15	0	uncultured Desulfobacteraceae bacterium
636	AF-A0A3C1B404-F1-model_v4 Uncharacterized protein	9	0	Clostridiales bacterium
637	AF-A0A533QP93-F1-model_v4 SH3b domain-containing protein	10.8	0	Candidatus Accumulibacter sp.
638	AF-A0A562FA05-F1-model_v4 Uncharacterized protein YraI	9.7	0	Aminobacter sp. J15
639	AF-A0A3M2AGB2-F1-model_v4 SH3 domain-containing protein	13.7	0	Chloroflexi bacterium
640	AF-A0A845C7P4-F1-model_v4 SH3 domain-containing protein	9.6	0	Caldilineaceae bacterium SB0666_bin_21
641	AF-A0A350IEI8-F1-model_v4 Uncharacterized protein	9.5	0	Saprospirales bacterium
642	AF-A0A7C1MQN2-F1-model_v4 SH3 domain-containing protein	11.1	0	Candidatus Moranbacteria bacterium
643	AF-A0A1Q6KX27-F1-model_v4 Uncharacterized protein	10.8	0	Clostridiales bacterium 41_12_two_minus
644	AF-A9IRC1-F1-model_v4 SH3b domain-containing protein	8	0	Bartonella tribocorum CIP 105476
645	AF-A0A6H2KV82-F1-model_v4 SH3 domain-containing protein	11.3	0	Paracoccus sanguinis
646	AF-A0A536T6M2-F1-model_v4 Uncharacterized protein	6.9	0	Betaproteobacteria bacterium
647	AF-A0A5B2ZDE0-F1-model_v4 SH3 domain-containing protein	12.7	0	Arenimonas fontis
648	AF-A0A7S1RQH0-F1-model_v4 Hypothetical protein	10.9	0	Alexandrium catenella
649	AF-A0A3Q9IC01-F1-model_v4 Uncharacterized protein	14.9	0	Paenibacillus lutimineralis
650	AF-A5V1I3-F1-model_v4 SH3, type 3 domain protein	12.2	0	Roseiflexus sp. RS-1
651	AF-A0A4U2LDH3-F1-model_v4 Ribonuclease	8.6	0	Puteibacter caeruleilacunae
652	AF-A0A1I0DHU5-F1-model_v4 Uncharacterized protein	17.3	0	Stigmatella erecta
653	AF-A0A0D5NMP1-F1-model_v4 Uncharacterized protein	11.4	0	Paenibacillus beijingensis
654	AF-A0A2T7FST3-F1-model_v4 SH3b domain-containing protein	11.2	0	Thalassorhabdomicrobium marinisediminis
655	AF-R9C7Y3-F1-model_v4 Uncharacterized protein	10.4	0	Clostridium sartagoforme AAU1
656	AF-A0A3N5DXK2-F1-model_v4 DUF3761 domain-containing protein	13	0	Bacteroidales bacterium
657	AF-A0A4Y9QB02-F1-model_v4 SH3 domain-containing protein	11.6	0	Oxalobacteraceae bacterium OM1
658	AF-A0A2R6K994-F1-model_v4 Peptidase_M23 domain-containing protein	12.1	0	Halobacteriales archaeon QS_9_68_17
659	AF-A0A679IXS5-F1-model_v4 SH3b domain-containing protein	9.7	0	Variovorax paradoxus
660	AF-A0A661I2V2-F1-model_v4 Uncharacterized protein	14.3	0	Epsilonproteobacteria bacterium
661	AF-E7QML6-F1-model_v4 N-acetylmuramyl-L-alanine amidase, negative regulator of AmpC, AmpD	6.5	0	Haladaptatus paucihalophilus DX253
662	AF-A0A4U0ZGZ3-F1-model_v4 SH3 domain-containing protein	10	0	Desulforhopalus sp. IMCC35007
663	AF-A0A7C4IM60-F1-model_v4 SH3b domain-containing protein	9.3	0	Nitrospirae bacterium
664	AF-A0A4R8IJW7-F1-model_v4 SH3 domain-containing protein	13.5	0	Epilithonimonas xixisoli
665	AF-A0A6H9Y7M6-F1-model_v4 SH3 domain-containing protein	8.6	0	Betaproteobacteria bacterium SCN1
666	AF-A0A4D4JIH2-F1-model_v4 Uncharacterized protein	12.3	0	Acidovorax sp. NB1
667	AF-A0A6C2CIY5-F1-model_v4 SH3b domain-containing protein	11.4	0	Zoogloea oleivorans
668	AF-A0A813JCP9-F1-model_v4 Hypothetical protein	9.3	0	Polarella glacialis
669	AF-A0A6J4T6U8-F1-model_v4 SH3_16 domain-containing protein	9.6	0	uncultured Sphingomonas sp.
670	AF-A0A411Z5H3-F1-model_v4 SH3 domain-containing protein	17.5	0	Tabrizicola alkalilacus
671	AF-A0A6N7ZZR4-F1-model_v4 SH3b domain-containing protein	12.3	0	Roseibium sp. RKSG952
672	AF-A0A6N0ZAC9-F1-model_v4 SH3 domain-containing protein	10.8	0	Candidatus Accumulibacter sp.
673	AF-A0A3N5K963-F1-model_v4 SH3 domain-containing protein	6.6	0	Zetaproteobacteria bacterium
674	AF-A0A3N5MRS9-F1-model_v4 SH3b domain-containing protein	13.3	0	Chloroflexi bacterium
675	AF-A0A1S2DUG1-F1-model_v4 SH3b domain-containing protein	14.6	0	Agrobacterium vitis
676	AF-H7EM44-F1-model_v4 SH3 type 3 domain protein	9.6	0	Treponema saccharophilum DSM 2985
677	AF-A0A6P2E1T2-F1-model_v4 SH3b domain-containing protein	7.6	0	Variovorax sp. PBL-E5
678	AF-A0A523K7X8-F1-model_v4 Uncharacterized protein	11.1	0	Gammaproteobacteria bacterium
679	AF-A0A7V9VI36-F1-model_v4 SH3 domain-containing protein	11.2	0	Chloroflexia bacterium
680	AF-A0A4U2MIB5-F1-model_v4 Enterotoxin	11.8	0	Bacillus wiedmannii
681	AF-A0A7V9VUY8-F1-model_v4 SH3 domain-containing protein	9.4	0	Chloroflexia bacterium
682	AF-A0A6J4TXK0-F1-model_v4 Non-specific serine/threonine protein kinase	9.8	0	uncultured Thermomicrobiales bacterium
683	AF-A0A813FCN7-F1-model_v4 Hypothetical protein	9.7	0	Polarella glacialis
684	AF-A0A4Q2XC19-F1-model_v4 Uncharacterized protein	9.2	0	Verrucomicrobiaceae bacterium
685	AF-A0A515EJF3-F1-model_v4 DUF4384 domain-containing protein	10.3	0	Rhodoferax sediminis
686	AF-A0A497B2L4-F1-model_v4 SH3b domain-containing protein	14.4	0	Chloroflexi bacterium
687	AF-A0A353MWG8-F1-model_v4 SH3b domain-containing protein	13	0	Clostridium sp.
688	AF-A0A839NCJ2-F1-model_v4 Long-subunit fatty acid transport protein	11.4	0	Flexivirga oryzae
689	AF-A0A3A8T6L7-F1-model_v4 Uncharacterized protein	13.5	0	Corallococcus sp. AB038B
690	AF-A0A2E9F472-F1-model_v4 Uncharacterized protein	8.4	0	Candidatus Poribacteria bacterium
691	AF-A0A7C4J9E1-F1-model_v4 SH3 domain-containing protein	14.7	0	Chloroflexi bacterium
692	AF-A0A179FDG5-F1-model_v4 Uncharacterized protein	10	0	Pochonia chlamydosporia 170
693	AF-A0A1N7AHH7-F1-model_v4 SH3 domain-containing protein	12	0	Rhizobium sp. RU35A
694	AF-A0A536UQZ2-F1-model_v4 Uncharacterized protein	6.9	0	Betaproteobacteria bacterium
695	AF-A0A5K8A8F5-F1-model_v4 Uncharacterized protein	12.9	0	Desulfosarcina ovata subsp. ovata
696	AF-A0A327JXT4-F1-model_v4 Uncharacterized protein	7.8	0	Rhodobium orientis
697	AF-A0A2V7NNI0-F1-model_v4 SH3b domain-containing protein	10.6	0	Gemmatimonadetes bacterium
698	AF-A0A2C1REA8-F1-model_v4 Enterotoxin	11	0	Bacillus cereus
699	AF-A0A7V9HLL3-F1-model_v4 SH3 domain-containing protein	12.3	0	Chloroflexia bacterium
700	AF-A0A813H100-F1-model_v4 Hypothetical protein	9.3	0	Polarella glacialis
701	AF-A0A436F988-F1-model_v4 SH3 domain-containing protein	15.5	0	Mesorhizobium sp. M7A.F.Ca.CA.004.05.1.1
702	AF-A0A6I0EC38-F1-model_v4 SH3 domain-containing protein	10.3	0	Hyphomicrobium sp.
703	AF-A0A535XQQ3-F1-model_v4 SH3_16 domain-containing protein	15.4	0	Chloroflexi bacterium
704	AF-A0A2E3WU05-F1-model_v4 Uncharacterized protein	11.1	0	Bdellovibrionaceae bacterium
705	AF-A0A5B0WCU2-F1-model_v4 SH3 domain-containing protein	10.8	0	Rhizobium tropici
706	AF-A0A2S5R1P7-F1-model_v4 Ligand-binding protein SH3	9	0	Methylotenera sp.
707	AF-A0A522M241-F1-model_v4 SH3 domain-containing protein	5.1	0	Gammaproteobacteria bacterium
708	AF-A0A7V7PR49-F1-model_v4 Uncharacterized protein	13.4	0	Aureimonas leprariae
709	AF-A0A1I4E894-F1-model_v4 SH3 domain-containing protein	10	0	Falsiroseomonas stagni DSM 19981
710	AF-A0A809KCC0-F1-model_v4 Uncharacterized protein	9.5	0	Lactobacillus acidophilus
711	AF-A0A7S3HTJ6-F1-model_v4 Hypothetical protein	9.2	0	Spumella elongata
712	AF-A0A519LPC8-F1-model_v4 SH3 domain-containing protein	9.8	0	Acidovorax sp.
713	AF-A0A3P1WDR9-F1-model_v4 SH3 domain-containing protein	10.4	0	Tessaracoccus sp. OH4464_COT-324
714	AF-A0A2V9QBU7-F1-model_v4 Uncharacterized protein	13.7	0	Acidobacteria bacterium
715	AF-A0A2N5ZIF5-F1-model_v4 Uncharacterized protein	12.1	0	Candidatus Muirbacterium halophilum
716	AF-A0A2M8CQS6-F1-model_v4 Uncharacterized protein	12.4	0	Anaerolineae bacterium CG_4_9_14_3_um_filter_57_17
717	AF-A0A0M0K0A2-F1-model_v4 Uncharacterized protein	9	0	Chrysochromulina tobinii
718	AF-A0A7S3HM67-F1-model_v4 Hypothetical protein	12.5	0	Spumella elongata
719	AF-A0A3P3XTA2-F1-model_v4 Uncharacterized protein	10	0	uncultured spirochete
720	AF-A0A660CI61-F1-model_v4 Uncharacterized protein	13.6	0	Prauserella rugosa
721	AF-A0A2T4IEC8-F1-model_v4 Uncharacterized protein	9	0	Pseudothauera lacus
722	AF-A0A099T731-F1-model_v4 SH3b domain-containing protein	14.5	0	Thalassobacter sp. 16PALIMAR09
723	AF-A0A522D5P1-F1-model_v4 Uncharacterized protein	9.4	0	Alphaproteobacteria bacterium
724	AF-A0A0E4GBX8-F1-model_v4 SH3-like domain, bacterial-type	8	0	Syntrophomonas zehnderi OL-4
725	AF-A0A3L7J8T6-F1-model_v4 SH3b domain-containing protein	8.8	0	Notoacmeibacter ruber
726	AF-A0A1F4ARW6-F1-model_v4 Uncharacterized protein	13.1	0	Betaproteobacteria bacterium RIFCSPLOWO2_02_FULL_63_19
727	AF-A0A1T4LS12-F1-model_v4 N-acetylmuramoyl-L-alanine amidase	12.1	0	Anaerorhabdus furcosa
728	AF-A0A1J1C560-F1-model_v4 SH3 domain-containing protein	11.5	0	Caldithrix abyssi DSM 13497
729	AF-A0A2U0XDH5-F1-model_v4 Uncharacterized protein	12.7	0	Streptomyces sp. 3212.2
730	AF-A0A7S3HRP9-F1-model_v4 Hypothetical protein	11.6	0	Spumella elongata
731	AF-A0A7S2NAA2-F1-model_v4 Hypothetical protein	11.7	0	Alexandrium andersonii
732	AF-A0A4Q4ICN4-F1-model_v4 Mannosyl-glycoprotein endo-beta-N-acetylglucosamidase	15.8	0	Sporolactobacillus sp. THM19-2
733	AF-A0A813LRB3-F1-model_v4 Hypothetical protein	12.8	0	Polarella glacialis
734	AF-A0A356M3F6-F1-model_v4 SH3b domain-containing protein	11.2	0	Clostridiales bacterium
735	AF-A0A7W0TXX3-F1-model_v4 SH3 domain-containing protein	11.9	0	Chloroflexia bacterium
736	AF-A0A7S1KWS7-F1-model_v4 Hypothetical protein	14.1	0	Alexandrium catenella
737	AF-A0A7U0A0J4-F1-model_v4 Uncharacterized protein	12	0	Enterococcus casseliflavus
738	AF-A0A1N7PGR5-F1-model_v4 Uncharacterized protein	12.7	0	Achromobacter sp. MFA1 R4
739	AF-G5J970-F1-model_v4 Uncharacterized protein	12.7	0	Crocosphaera watsonii WH 0003
740	AF-A0A347UKQ7-F1-model_v4 SH3 domain-containing protein	12.1	0	Profundibacter amoris
741	AF-A0A431I3Z3-F1-model_v4 SH3 domain-containing protein	7.6	0	Neisseriaceae bacterium
742	AF-A0A7G1HRC2-F1-model_v4 SH3b domain-containing protein	14.3	0	Helicobacter pylori
743	AF-A0A7S4REF8-F1-model_v4 Hypothetical protein	10.9	0	Alexandrium monilatum
744	AF-A0A0G1K0L9-F1-model_v4 Endonuclease/exonuclease/phosphatase	15.8	0	Candidatus Giovannonibacteria bacterium GW2011_GWA2_44_13b
745	AF-A0A7W5DCS2-F1-model_v4 Uncharacterized protein YraI	6.8	0	Variovorax sp. Sphag1AA
746	AF-A0A7S3HG59-F1-model_v4 Hypothetical protein	9.5	0	Spumella elongata
747	AF-A0A534VHE8-F1-model_v4 SH3 domain-containing protein	8.5	0	Deltaproteobacteria bacterium
748	AF-A0A1F5VNB9-F1-model_v4 Uncharacterized protein	7.7	0	Candidatus Giovannonibacteria bacterium RIFCSPHIGHO2_02_42_15
749	AF-A0A3M1UU40-F1-model_v4 Uncharacterized protein	11.2	0	Gammaproteobacteria bacterium
750	AF-A0A259TWU3-F1-model_v4 Uncharacterized protein	14.8	0	Rubricoccus marinus
751	AF-A0A7S2F3Q6-F1-model_v4 Hypothetical protein	13	0	Alexandrium andersonii
752	AF-A0A562CDS4-F1-model_v4 Uncharacterized protein YraI	11.7	0	Mesorhizobium sp. J18
753	AF-A0A838S012-F1-model_v4 Uncharacterized protein	8.9	0	Pyrinomonadaceae bacterium
754	AF-A0A7C3FY88-F1-model_v4 Uncharacterized protein	13.7	0	Thermoflexia bacterium
755	AF-A0A2N5DQH5-F1-model_v4 Hydrolase Nlp/P60	11.8	0	Caulobacter zeae
756	AF-A0A2M8ZGP3-F1-model_v4 Uncharacterized protein YraI	8.8	0	Afipia broomeae
757	AF-A0A512CLK7-F1-model_v4 NlpC/P60 domain-containing protein	9.1	0	Alicyclobacillus acidoterrestris
758	AF-A0A4Q3XRY8-F1-model_v4 SH3 domain-containing protein	14.8	0	Alphaproteobacteria bacterium
759	AF-A0A3M1FKY3-F1-model_v4 SH3 domain-containing protein	10.1	0	Candidatus Dadabacteria bacterium
760	AF-A0A7X1HFI4-F1-model_v4 SH3 domain-containing protein	12.5	0	Rhizobium sp. AQ_MP
761	AF-D1C1X4-F1-model_v4 SH3b domain-containing protein	10.7	0	Sphaerobacter thermophilus DSM 20745
762	AF-A0A239I588-F1-model_v4 SH3 domain-containing protein	10.2	0	Tropicimonas sediminicola
763	AF-A0A7Y5H8Q8-F1-model_v4 Uncharacterized protein	12.5	0	Candidatus Brocadiae bacterium
764	AF-A0A7S3T7M0-F1-model_v4 Hypothetical protein	15	0	Strombidinopsis acuminata
765	AF-A0A2A7EEF2-F1-model_v4 SH3b domain-containing protein	6.9	0	Bacillus cereus
766	AF-A0A2S8WPV8-F1-model_v4 D-alanyl-D-alanine carboxypeptidase	13.6	0	Arthrobacter sp. MYb227
767	AF-A0A812JZG6-F1-model_v4 Hypothetical protein	10.2	0	Symbiodinium pilosum
768	AF-A0A2A2ASD0-F1-model_v4 SH3b domain-containing protein	14.2	0	Vandammella animalimorsus
769	AF-A0A6L5X6J4-F1-model_v4 SH3 domain-containing protein	9.2	0	Porcincola intestinalis
770	AF-A0A2M7GDB3-F1-model_v4 SH3b domain-containing protein	13	0	Anaerolineae bacterium CG17_big_fil_post_rev_8_21_14_2_50_57_27
771	AF-A0A233VJD7-F1-model_v4 Enterotoxin	12.9	0	Finegoldia magna
772	AF-T0SHD7-F1-model_v4 SH3 domain protein	7.8	0	Bacteriovorax sp. BSW11_IV
773	AF-A0A1Y5RJ51-F1-model_v4 Bacterial SH3 domain protein	13	0	Aquimixticola soesokkakensis
774	AF-A0A1F3X8Y0-F1-model_v4 Uncharacterized protein	11.3	0	Bdellovibrionales bacterium RIFOXYD1_FULL_44_7
775	AF-A0A3N5G613-F1-model_v4 Uncharacterized protein	18	0	Chloroflexi bacterium
776	AF-A0A661WIZ4-F1-model_v4 SH3b domain-containing protein	11.9	0	Chloroflexi bacterium
777	AF-A0A3D5SQC8-F1-model_v4 Uncharacterized protein	15.6	0	Blastocatellia bacterium
778	AF-A0A6C0FZ37-F1-model_v4 SH3 domain-containing protein	12.8	0	Paenibacillus lycopersici
779	AF-A0A5C4JF14-F1-model_v4 Uncharacterized protein	9.2	0	Actinomadura soli
780	AF-A0A2M8NIK7-F1-model_v4 Uncharacterized protein	9	0	Phototrophicales bacterium
781	AF-A0A7S2M7E2-F1-model_v4 Hypothetical protein	10.2	0	Brandtodinium nutricula
782	AF-A0A1M3ACF2-F1-model_v4 SH3b domain-containing protein	10.6	0	Alphaproteobacteria bacterium 62-8
783	AF-A0A2W5A1U0-F1-model_v4 Uncharacterized protein	13.5	0	Pseudoxanthomonas suwonensis
784	AF-A0A0M6Z2B8-F1-model_v4 SH3b domain-containing protein	11.2	0	Roseibium album
785	AF-A0A1G6VJL4-F1-model_v4 Uncharacterized protein	9.3	0	Paenibacillus sp. CF095
786	AF-A0A7W1DVI8-F1-model_v4 Uncharacterized protein	14.1	0	Chloroflexia bacterium
787	AF-B8HV27-F1-model_v4 SH3b domain-containing protein	8.2	0	Cyanothece sp. PCC 7425
788	AF-A0A7S1L1S9-F1-model_v4 Hypothetical protein	10.6	0	Alexandrium catenella
789	AF-A0A7X6Z7L1-F1-model_v4 SH3 domain-containing protein	13.4	0	Clostridiaceae bacterium
790	AF-L7U4G5-F1-model_v4 TPR repeat containing protein	7.6	0	Myxococcus stipitatus DSM 14675
791	AF-A0A504KWS3-F1-model_v4 SH3 domain-containing protein	11.1	0	Mesorhizobium sp. B1-1-5
792	AF-A0A7V7BCT5-F1-model_v4 Uncharacterized protein	11.7	0	Alphaproteobacteria bacterium
793	AF-A0A561T7D8-F1-model_v4 Uncharacterized protein	12.7	0	Kitasatospora viridis
794	AF-A0A3A4WDR0-F1-model_v4 SH3 domain-containing protein	10.4	0	Actinomycetia bacterium
795	AF-A0A258BWJ5-F1-model_v4 SH3b domain-containing protein	15.4	0	Sphingobium sp. 32-64-5
796	AF-D2VG09-F1-model_v4 Predicted protein	10.1	0	Naegleria gruberi
797	AF-A0A417DG83-F1-model_v4 SH3 domain-containing protein	12.4	0	Ruminococcus sp. AM40-10AC
798	AF-A0A1Z4IHD7-F1-model_v4 SH3b domain-containing protein	10.3	0	Nostoc sp. NIES-2111
799	AF-A0A4Q7E1M3-F1-model_v4 Uncharacterized protein	15.5	0	Leptolyngbya sp. LK
800	AF-A0A812QWG6-F1-model_v4 Hypothetical protein	10.8	0	Symbiodinium sp. KB8
801	AF-A0A2M6UZ49-F1-model_v4 DUF4384 domain-containing protein	11.1	0	Limnohabitans sp. B9-3
802	AF-A0A1X7C0N7-F1-model_v4 SH3b domain-containing protein	11.9	0	Desulfovibrio gilichinskyi
803	AF-A0A538FKV1-F1-model_v4 SH3 domain-containing protein	13.6	0	Actinomycetia bacterium
804	AF-A0A1F6U6C4-F1-model_v4 SH3b domain-containing protein	9.9	0	Candidatus Muproteobacteria bacterium RIFCSPLOWO2_01_FULL_60_18
805	AF-A0A0L1JN42-F1-model_v4 SH3b domain-containing protein	15.2	0	Pseudaestuariivita atlantica
806	AF-J0R1C4-F1-model_v4 SH3b domain-containing protein	12.7	0	Bartonella tamiae Th239
807	AF-E1X0U8-F1-model_v4 Putative membrane protein	12.2	0	Halobacteriovorax marinus SJ
808	AF-A0A1H0N7G7-F1-model_v4 SH3b domain-containing protein	11.7	0	Nakamurella panacisegetis
809	AF-A0A3M1CGV7-F1-model_v4 NlpC/P60 domain-containing protein	8.9	0	candidate division Zixibacteria bacterium
810	AF-A0A7S1MD63-F1-model_v4 Hypothetical protein	13	0	Alexandrium catenella
811	AF-A0A372GBD0-F1-model_v4 HTH cro/C1-type domain-containing protein	14.3	0	Actinomadura spongiicola
812	AF-A0A538PNL0-F1-model_v4 Uncharacterized protein	14.4	0	Deltaproteobacteria bacterium
813	AF-A0A7S3TMB9-F1-model_v4 Hypothetical protein	8.8	0	Strombidinopsis acuminata
814	AF-A0A1R0WKX8-F1-model_v4 Hydrolase	10.7	0	Paenibacillus odorifer
815	AF-A0A547PMM9-F1-model_v4 SH3b domain-containing protein	13.7	0	Paenimaribius caenipelagi
816	AF-A0A1H3ND04-F1-model_v4 SH3 domain-containing protein	14.4	0	Hymenobacter psychrophilus
817	AF-A0A438W8P0-F1-model_v4 SH3b domain-containing protein	14.7	0	Helicobacter pylori
818	AF-A0A2E2EEL8-F1-model_v4 SH3b domain-containing protein	10.6	0	Halobacteriovoraceae bacterium
819	AF-A0A813M439-F1-model_v4 Hypothetical protein	11.2	0	Polarella glacialis
820	AF-A0A7V2JG34-F1-model_v4 NlpC/P60 domain-containing protein	11.1	0	Thermotogaceae bacterium
821	AF-A0A2E5SIH8-F1-model_v4 Uncharacterized protein	7.6	0	Candidatus Marinimicrobia bacterium
822	AF-A0A495F6J1-F1-model_v4 Curli biogenesis system outer membrane secretion channel CsgG	8.3	0	Sphingomonas elodea
823	AF-A0A7Z9YZM7-F1-model_v4 SH3b domain-containing protein	16.6	0	Desulfobacterales bacterium
824	AF-A0A7V5R994-F1-model_v4 DUF2075 domain-containing protein	12.7	0	Deltaproteobacteria bacterium
825	AF-A0A2S6U0E4-F1-model_v4 Uncharacterized protein	12.8	0	Alphaproteobacteria bacterium MarineAlpha3_Bin7
826	AF-R5Z250-F1-model_v4 Glycoside hydrolase family 18	9.4	0	Clostridium sp. CAG:492
827	AF-A0A812PFQ6-F1-model_v4 ME1 protein	16.5	0	Symbiodinium pilosum
828	AF-A0A847X3X7-F1-model_v4 SH3 domain-containing protein	10.5	0	Gallicola sp.
829	AF-A0A455SF20-F1-model_v4 Uncharacterized protein	9	0	Thermosporothrix sp. COM3
830	AF-A0A7Y2FT42-F1-model_v4 SH3 domain-containing protein	13.2	0	Hyphomicrobiales bacterium
831	AF-A0A318EB52-F1-model_v4 Uncharacterized protein	10	0	Sinimarinibacterium flocculans
832	AF-A0A4U3BQN6-F1-model_v4 Enterotoxin	9.7	0	Bacillus cereus
833	AF-A0A0G1RW11-F1-model_v4 SH3b domain-containing protein	8	0	Candidatus Beckwithbacteria bacterium GW2011_GWB1_47_15
834	AF-A0A2R8BHG2-F1-model_v4 SH3b domain-containing protein	15.1	0	Ascidiaceihabitans donghaensis
835	AF-A0A6N8F3U9-F1-model_v4 SH3 domain-containing protein	12.6	0	Paenibacillus macerans
836	AF-A0A1F5EWX9-F1-model_v4 SH3b domain-containing protein	12.7	0	Candidatus Coatesbacteria bacterium RBG_13_66_14
837	AF-A0A848G7Z8-F1-model_v4 Uncharacterized protein	11.4	0	Zoogloea dura
838	AF-A0A7X8PIQ8-F1-model_v4 SH3 domain-containing protein	9.7	0	Rhizobium sp. P28RR-XV
839	AF-A0A813FKE5-F1-model_v4 Hypothetical protein	11.3	0	Polarella glacialis
840	AF-A0A533RDF4-F1-model_v4 SH3 domain-containing protein	10.1	0	Deltaproteobacteria bacterium
841	AF-A0A318STW3-F1-model_v4 SH3 domain-containing protein	13.9	0	Pseudoroseicyclus aestuarii
842	AF-A0A1I2VJV0-F1-model_v4 SH3 domain-containing protein	9.7	0	Desulfotruncus arcticus DSM 17038
843	AF-A0A6B1E4S1-F1-model_v4 SH3 domain-containing protein	9.2	0	Chloroflexi bacterium
844	AF-A0A329ZUS4-F1-model_v4 SH3b domain-containing protein	9.8	0	Helicobacter sp. 15-1451
845	AF-A0A0B0I0E4-F1-model_v4 Gamma-DL-glutamyl hydrolase	9.4	0	Paenibacillus sp. P1XP2
846	AF-A0A534HET5-F1-model_v4 SH3 domain-containing protein	13.3	0	Gammaproteobacteria bacterium
847	AF-A0A3M1VR76-F1-model_v4 SH3b domain-containing protein	11.6	0	Candidatus Dadabacteria bacterium
848	AF-A0A813GSS6-F1-model_v4 Hypothetical protein	10.2	0	Polarella glacialis
849	AF-A0A3A9FGW4-F1-model_v4 NlpC/P60 domain-containing protein	6.6	0	bacterium 1XD42-54
850	AF-A0A2H6GSX2-F1-model_v4 SH3b domain-containing protein	10.7	0	bacterium BMS3Abin15
851	AF-A0A7W3VS06-F1-model_v4 SH3 domain-containing protein	7.7	0	Amycolatopsis dendrobii
852	AF-A0A813I004-F1-model_v4 Hypothetical protein	7.7	0	Polarella glacialis
853	AF-A0A6M8WYM7-F1-model_v4 SH3 domain-containing protein	7	0	Rhizobium indicum
854	AF-A0A7X8E515-F1-model_v4 SH3 domain-containing protein	13.6	0	Clostridiaceae bacterium
855	AF-A0A5E7YIF4-F1-model_v4 SH3b domain-containing protein	11.9	0	Rhizobium sp. EC-SD404
856	AF-A0A1G3L6X1-F1-model_v4 SH3b domain-containing protein	14.4	0	Spirochaetes bacterium GWB1_36_13
857	AF-A0A7S4Q1M1-F1-model_v4 Hypothetical protein	11.7	0	Alexandrium monilatum
858	AF-A0A7S3LYQ9-F1-model_v4 Hypothetical protein	13.4	0	Spumella elongata
859	AF-A0A1E3ZYK0-F1-model_v4 SH3b domain-containing protein	7.7	0	Chryseobacterium sp. SCN 40-13
860	AF-A0A8A7W9T5-F1-model_v4 SH3 domain-containing protein	13.6	0	Cognatishimia activa
861	AF-A0A2W1JQ60-F1-model_v4 SH3b domain-containing protein	14.2	0	Acaryochloris thomasi RCC1774
862	AF-A0A813K1M9-F1-model_v4 Hypothetical protein	8.4	0	Polarella glacialis
863	AF-B4WNY1-F1-model_v4 Bacterial SH3 domain family	9.2	0	Synechococcus sp. PCC 7335
864	AF-A0A2R6M791-F1-model_v4 Peptidase_M23 domain-containing protein	8.5	0	Halobacteriales archaeon SW_6_65_15
865	AF-A0A1Q6KU94-F1-model_v4 SH3b domain-containing protein	11.8	0	Clostridiales bacterium 41_12_two_minus
866	AF-A0A2E4QSX2-F1-model_v4 SH3b domain-containing protein	12.5	0	Hirschia sp.
867	AF-A0A1G7C0N9-F1-model_v4 DnaJ domain-containing protein	14.1	0	Rhodospira trueperi
868	AF-A0A2J6WPV5-F1-model_v4 AAA domain-containing protein	11.3	0	Calditerrivibrio nitroreducens
869	AF-A0A7Z9Y772-F1-model_v4 SH3b domain-containing protein	14.2	0	Anaerolineae bacterium
870	AF-A0A853HZK9-F1-model_v4 Uncharacterized protein	11.5	0	Azospirillum oleiclasticum
871	AF-A0A1G9BEW4-F1-model_v4 SH3 domain-containing protein	9	0	Microbulbifer yueqingensis
872	AF-A0A812IXR3-F1-model_v4 Man1a1 protein	12.7	0	Symbiodinium necroappetens
873	AF-A0A350VJR5-F1-model_v4 SH3 domain-containing protein	10.3	0	Eubacterium sp.
874	AF-A0A1K1MDG6-F1-model_v4 SH3 domain-containing protein	11.8	0	Ruminococcus sp. YE71
875	AF-A0A5B8BTD9-F1-model_v4 SH3b domain-containing protein	9.8	0	Oceanicola sp. D3
876	AF-A0A7V9HJI4-F1-model_v4 Transglycosylase SLT domain-containing protein	10.4	0	Chloroflexia bacterium
877	AF-A0A1J0GIA6-F1-model_v4 SH3b domain-containing protein	11.1	0	Clostridium estertheticum subsp. estertheticum
878	AF-A0A371XFQ2-F1-model_v4 Uncharacterized protein	13.7	0	Mesorhizobium denitrificans
879	AF-A0A1U7NJQ3-F1-model_v4 Uncharacterized protein	20	0	Dubosiella newyorkensis
880	AF-A0A5A7NTR3-F1-model_v4 SH3b domain-containing protein	11.4	0	Zafaria cholistanensis
881	AF-A0A497CAM3-F1-model_v4 SH3b domain-containing protein	14.7	0	Chloroflexi bacterium
882	AF-A0A176U9K3-F1-model_v4 N-acetylmuramoyl-L-alanine amidase	10.1	0	Clostridiales bacterium KLE1615
883	AF-A0A2N2JEJ5-F1-model_v4 Uncharacterized protein	11.2	0	Deltaproteobacteria bacterium HGW-Deltaproteobacteria-14
884	AF-A0A812T136-F1-model_v4 LanA protein	6.8	0	Symbiodinium microadriaticum
885	AF-A0A7C4CT62-F1-model_v4 Uncharacterized protein	12.2	0	Candidatus Bathyarchaeota archaeon
886	AF-A0A812P738-F1-model_v4 Epi-1 protein	10.1	0	Symbiodinium sp. CCMP2456
887	AF-A0A7W0TX77-F1-model_v4 SH3 domain-containing protein	11.8	0	Chloroflexia bacterium
888	AF-A0A7S2AK42-F1-model_v4 Hypothetical protein	11.3	0	Alexandrium andersonii
889	AF-A0A813I5N5-F1-model_v4 Hypothetical protein	11.5	0	Polarella glacialis
890	AF-A0A7V8X5J9-F1-model_v4 SH3 domain-containing protein	9.6	0	Chloroflexia bacterium
891	AF-A0A7W0Z100-F1-model_v4 SH3 domain-containing protein	11.6	0	Chloroflexia bacterium
892	AF-A0A7C3DI05-F1-model_v4 SH3b domain-containing protein	11.2	0	Chloroflexi bacterium
893	AF-A0A3T1D163-F1-model_v4 Uncharacterized protein	16.7	0	Cohnella abietis
894	AF-A0A2D9YSD5-F1-model_v4 SH3b domain-containing protein	15.4	0	Maritimibacter sp.
895	AF-A0A7S3JRA9-F1-model_v4 Hypothetical protein	11.6	0	Aureoumbra lagunensis
896	AF-A0A6I4PWD5-F1-model_v4 Uncharacterized protein	13.7	0	Actinomadura sp. J1-007
897	AF-A0A1G8VMD2-F1-model_v4 Uncharacterized protein	9.8	0	Actinopolyspora mzabensis
898	AF-A0A2G3DZR7-F1-model_v4 SH3b domain-containing protein	11.1	0	Agathobacter ruminis
899	AF-A0A2B0DF68-F1-model_v4 SH3b domain-containing protein	14.6	0	Bacillus thuringiensis
900	AF-A0A535BE20-F1-model_v4 Uncharacterized protein	9.4	0	Deltaproteobacteria bacterium
901	AF-A6CP25-F1-model_v4 Uncharacterized protein	10.5	0	Bacillus sp. SG-1
902	AF-A0A4Q3U3N8-F1-model_v4 Phosphoribosylformylglycinamidine synthase	9.6	0	bacterium
903	AF-A0A433DG22-F1-model_v4 NlpC/P60 domain-containing protein	12.4	0	Jimgerdemannia flammicorona
904	AF-A0A7D3WSU0-F1-model_v4 DUF4468 domain-containing protein	6.2	0	Hymenobacter sp. BRD67
905	AF-A0A380WMW7-F1-model_v4 Uncharacterized protein conserved in bacteria	14.2	0	Aminobacter aminovorans
906	AF-A0A812ZNX3-F1-model_v4 Hypothetical protein	12	0	Symbiodinium microadriaticum
907	AF-A0A1I7LY33-F1-model_v4 SH3 domain-containing protein	11.3	0	Methylobacterium sp. 174MFSha1.1
908	AF-A0A7S1WF40-F1-model_v4 Hypothetical protein	16.2	0	Alexandrium catenella
909	AF-A0A7S1REI9-F1-model_v4 Hypothetical protein	14.4	0	Alexandrium catenella
910	AF-A0A4R8GK07-F1-model_v4 S-layer family protein	6.4	0	Cytobacillus oceanisediminis
911	AF-A0A7S2M273-F1-model_v4 Hypothetical protein	9.3	0	Brandtodinium nutricula
912	AF-A0A7S3TFF0-F1-model_v4 Hypothetical protein	15	0	Strombidinopsis acuminata
913	AF-A0A7S2WU80-F1-model_v4 Hypothetical protein	13.7	0	Rhizochromulina marina
914	AF-A0A4Q1D3G9-F1-model_v4 SH3 domain-containing protein	8.3	0	Filimonas effusa
915	AF-A0A6P0JS04-F1-model_v4 Uncharacterized protein	12.5	0	Kamptonema sp. SIO4C4
916	AF-A0A2V7UG09-F1-model_v4 SH3b domain-containing protein	11.2	0	Acidobacteria bacterium
917	AF-A0A839ACU9-F1-model_v4 Uncharacterized protein	16.3	0	Stappia albiluteola
918	AF-A0A426TSC7-F1-model_v4 Uncharacterized protein	12.5	0	Candidatus Viridilinea halotolerans
919	AF-A0A351UQ41-F1-model_v4 Uncharacterized protein	7.6	0	Elusimicrobia bacterium
920	AF-A0A2T3FVL9-F1-model_v4 LysM domain-containing protein	14.1	0	Clostridium fessum
921	AF-A0A1I3NZP3-F1-model_v4 Uncharacterized protein	12.1	0	Amycolatopsis sacchari
922	AF-A0A813IAP2-F1-model_v4 Hypothetical protein	7	0	Polarella glacialis
923	AF-V7FC63-F1-model_v4 SH3b domain-containing protein	12.7	0	Mesorhizobium sp. LSHC420B00
924	AF-A0A7V5C439-F1-model_v4 Uncharacterized protein	7.5	0	Campylobacterales bacterium
925	AF-A0A538AE49-F1-model_v4 SH3 domain-containing protein	11.2	0	Actinomycetia bacterium
926	AF-E2CLX3-F1-model_v4 Putative DNA translocase FtsK	14.8	0	Roseibium sp. TrichSKD4
927	AF-R6Q7J0-F1-model_v4 SH3 type 3 domain protein	8.8	0	Clostridium sp. CAG:508
928	AF-A0A534UM86-F1-model_v4 Uncharacterized protein	13	0	Deltaproteobacteria bacterium
929	AF-A0A6S5Y4C5-F1-model_v4 Uncharacterized protein	3.1	0	Aeromonas veronii
930	AF-A0A7S3M1R5-F1-model_v4 Hypothetical protein	8	0	Spumella elongata
931	AF-A0A7S2DC39-F1-model_v4 Hypothetical protein	9	0	Alexandrium andersonii
932	AF-A0A535YGD0-F1-model_v4 Uncharacterized protein	10.7	0	Chloroflexi bacterium
933	AF-A0A812UMZ9-F1-model_v4 Hypothetical protein	8.4	0	Symbiodinium natans
934	AF-A0A2T6AS62-F1-model_v4 SH3 domain-containing protein	11	0	Allosediminivita pacifica
935	AF-A0A2E0UYC8-F1-model_v4 Uncharacterized protein	16.8	0	Anaerolineaceae bacterium
936	AF-A0A7W6W0I9-F1-model_v4 Uncharacterized protein YraI	6.5	0	Rhodoblastus acidophilus
937	AF-A0A535XV03-F1-model_v4 Uncharacterized protein	17	0	Chloroflexi bacterium
938	AF-A0A6P1HKM3-F1-model_v4 Polysaccharide deacetylase family protein	10.5	0	Pontibacillus sp. HMF3514
939	AF-A0A1E3BDQ2-F1-model_v4 Uncharacterized protein	9.3	0	Aspergillus cristatus
940	AF-A0A292YCN7-F1-model_v4 SH3b domain-containing protein	9.5	0	Effusibacillus lacus
941	AF-A0A534V8K9-F1-model_v4 Uncharacterized protein	10.5	0	Deltaproteobacteria bacterium
942	AF-A0A1G2UR04-F1-model_v4 Uncharacterized protein	12.3	0	Candidatus Zambryskibacteria bacterium RIFCSPLOWO2_12_FULL_39_16
943	AF-A0A1J3FU41-F1-model_v4 F-box/kelch-repeat protein	6	0	Noccaea caerulescens
944	AF-A0A268NTD1-F1-model_v4 Uncharacterized protein	14.2	0	Alkalihalobacillus clausii
945	AF-A0A7R6XFV2-F1-model_v4 Uncharacterized protein	11.5	0	Mesorhizobium sp. 113-3-9
946	AF-A0A291M1S9-F1-model_v4 SH3b domain-containing protein	17.2	0	Pacificitalea manganoxidans
947	AF-A0A7W8XXS1-F1-model_v4 Uncharacterized protein YraI	7.2	0	Rhizobium paranaense
948	AF-A0A4R1R6P1-F1-model_v4 N-acetylmuramoyl-L-alanine amidase	12.8	0	Kineothrix alysoides
949	AF-A0A7X8HMX3-F1-model_v4 SH3 domain-containing protein	11.9	0	Clostridiaceae bacterium
950	AF-A0A7S3U8H8-F1-model_v4 Hypothetical protein	10.1	0	Strombidinopsis acuminata
951	AF-A0A3P1W3T9-F1-model_v4 SH3 domain-containing protein	13.1	0	Tessaracoccus sp. OH4464_COT-324
952	AF-A0A285NFB9-F1-model_v4 SH3 domain-containing protein	12.5	0	Persephonella hydrogeniphila
953	AF-V6SR94-F1-model_v4 SH3b domain-containing protein	12.2	0	Flavobacterium limnosediminis JC2902
954	AF-A0A2T0RGI7-F1-model_v4 SH3 domain-containing protein	13.7	0	Aliiruegeria haliotis
955	AF-A0P2R7-F1-model_v4 SH3b domain-containing protein	11.6	0	Roseibium aggregatum IAM 12614
956	AF-A0A7T1WSX1-F1-model_v4 Uncharacterized protein	7.8	0	Streptomyces bathyalis
957	AF-A0A347UD67-F1-model_v4 SH3 domain-containing protein	8.3	0	Profundibacter amoris
958	AF-A0A4P9K5Y9-F1-model_v4 Uncharacterized protein	10.3	0	Thiomicrorhabdus sediminis
959	AF-A0A534SYV8-F1-model_v4 Uncharacterized protein	12.6	0	Deltaproteobacteria bacterium
960	AF-A0A168W920-F1-model_v4 PPM-type phosphatase domain-containing protein	9.7	0	Phormidium willei BDU 130791
961	AF-A0A166FA04-F1-model_v4 Uncharacterized protein	13.3	0	Methanobrevibacter filiformis
962	AF-A0A1E2RWU0-F1-model_v4 Bacterial SH3 domain protein	7.9	0	Methyloligella halotolerans
963	AF-A0A1G2KQQ4-F1-model_v4 Uncharacterized protein	7.7	0	Candidatus Sungbacteria bacterium RIFCSPHIGHO2_02_FULL_49_12
964	AF-A0A350C1D0-F1-model_v4 SH3b domain-containing protein	11.2	0	Lachnospiraceae bacterium
965	AF-A0A813KWR0-F1-model_v4 Hypothetical protein	15.4	0	Polarella glacialis
966	AF-A0A812JMY5-F1-model_v4 LanA protein	12.3	0	Symbiodinium necroappetens
967	AF-A0A1G5YQI8-F1-model_v4 SH3 domain-containing protein	9.2	0	Sinorhizobium sp. NFACC03
968	AF-A0A1B4XC20-F1-model_v4 Ligand-binding protein SH3	11	0	Sulfuricaulis limicola
969	AF-A0A812VDF6-F1-model_v4 Hypothetical protein	11.1	0	Symbiodinium pilosum
970	AF-U4L097-F1-model_v4 Uncharacterized protein	10.9	0	Pyronema omphalodes CBS 100304
971	AF-A0A3M1QTB6-F1-model_v4 Uncharacterized protein	7.5	0	Chloroflexi bacterium
972	AF-A0A2M7T5A6-F1-model_v4 SH3b domain-containing protein	13.3	0	Candidatus Aquicultor secundus
973	AF-A0A257SJA9-F1-model_v4 NlpC/P60 domain-containing protein	7	0	Gemmatimonadetes bacterium 21-71-4
974	AF-A0A2N2PL36-F1-model_v4 Uncharacterized protein	10	0	Chloroflexi bacterium HGW-Chloroflexi-10
975	AF-A0A1T4V928-F1-model_v4 Cell wall-associated hydrolase, NlpC family	10	0	Intestinibacter bartlettii DSM 16795
976	AF-A0A535SX64-F1-model_v4 Transposase	18.1	0	Chloroflexi bacterium
977	AF-A0A0F4VV57-F1-model_v4 Uncharacterized protein	6.6	0	Clostridium sp. IBUN13A
978	AF-A0A367UKI1-F1-model_v4 SH3b domain-containing protein	13.3	0	Thalassospira xianhensis MCCC 1A02616
979	AF-A0A813HET8-F1-model_v4 Hypothetical protein	11.8	0	Polarella glacialis
980	AF-A0A151Z9E8-F1-model_v4 Lipase_3 domain-containing protein	17.1	0	Tieghemostelium lacteum
981	AF-A0A433XL90-F1-model_v4 SH3 domain-containing protein	11.9	0	Arsenicitalea aurantiaca
982	AF-A0A1H0Q646-F1-model_v4 Uncharacterized protein	6.4	0	Actinokineospora alba
983	AF-A0A6T9AXX8-F1-model_v4 Hypothetical protein	12	0	Alexandrium catenella
984	AF-A0A2V8MWX4-F1-model_v4 SH3b domain-containing protein	9.7	0	Acidobacteria bacterium
985	AF-A0A527HQR6-F1-model_v4 DUF4236 domain-containing protein	14.6	0	Mesorhizobium sp.
986	AF-A0A2X2JR55-F1-model_v4 Sensor protein fixL	6.8	0	Sphingobacterium multivorum
987	AF-A0A2E4QEN0-F1-model_v4 Histidine kinase	11.3	0	Legionellales bacterium
988	AF-A0A502FXG9-F1-model_v4 SH3b domain-containing protein	11.4	0	Roseomonas nepalensis
989	AF-A0A7X4RTM2-F1-model_v4 SH3 domain-containing protein	10.4	0	Vibrio sp. CAIM 722
990	AF-A0A7S1LH19-F1-model_v4 Hypothetical protein	6.1	0	Alexandrium catenella
991	AF-A0A812XKW3-F1-model_v4 LanA protein	10	0	Symbiodinium sp. CCMP2592
992	AF-A0A5R2N880-F1-model_v4 SH3 domain-containing protein	14.8	0	Mesorhizobium sp. M2D.F.Ca.ET.145.01.1.1
993	AF-A0A0R2AZS3-F1-model_v4 Glycosyl hydrolase family 25	11.2	0	Apilactobacillus ozensis DSM 23829 = JCM 17196
994	AF-A0A7C6AKS8-F1-model_v4 Uncharacterized protein	10.9	0	Candidatus Aminicenantes bacterium
995	AF-A0A1Q2YZZ5-F1-model_v4 Bacterial SH3 domain protein	11.1	0	Roseomonas sp. TAS13
996	AF-A0A1L8CK43-F1-model_v4 Bacterial SH3 domain protein	10.5	0	Mariprofundus micogutta
997	AF-A0A351H816-F1-model_v4 Dockerin domain-containing protein	15	0	Oscillospiraceae bacterium
998	AF-A0A3D1YY67-F1-model_v4 SH3b domain-containing protein	13.6	0	Actinomycetia bacterium
999	AF-A0A3C1BHV6-F1-model_v4 HTH araC/xylS-type domain-containing protein	9.8	0	Mucilaginibacter sp.
1000	AF-A0A6A6EQ92-F1-model_v4 Uncharacterized protein	11.7	0	Zopfia rhizophila CBS 207.26
