# Supplementary material for: Amidase and lysozyme dual functions in TseP reveal a new family of chimeric effectors in the type VI secretion system
Source: eLife. 2025 Mar 10;13:RP101125. doi: 10.7554/eLife.101125 (PMC11893102; doi:10.7554/eLife.101125)
Supplement: Supplementary file 3. [file elife-101125-supp3.xlsx]

## Sheet: alis_afdb50
Number	Target	Sequence identity	E-value	Scientific Name
1	AF-K1JFN7-F1-model_v4 EF-hand domain-containing protein	100	3.088e-36	Aeromonas dhakensis
2	AF-A0A7R8GJM6-F1-model_v4 EF-hand domain-containing protein	70.9	1.111e-30	Aeromonas jandaei
3	AF-A0A0A0CQD6-F1-model_v4 EF-hand domain-containing protein	50	2.415e-23	Photorhabdus luminescens
4	AF-A0A1B7L3A5-F1-model_v4 EF-hand domain-containing protein	53.5	3.083e-23	Mangrovibacter phragmitis
5	AF-A0A1G8DTN4-F1-model_v4 Predicted chitinase	53.7	1.545e-22	Vibrio xiamenensis
6	AF-A0A6B8NFJ9-F1-model_v4 Uncharacterized protein	54.7	1.152e-22	Vibrio sp. THAF191c
7	AF-A0A2K8QIQ6-F1-model_v4 Uncharacterized protein	53.3	1.089e-21	Dickeya fangzhongdai
8	AF-A0A318IY89-F1-model_v4 Putative chitinase	49.3	4.986e-22	Burkholderia pyrrocinia
9	AF-A0A1H6RCP4-F1-model_v4 Predicted chitinase	51	8.532e-22	Paraburkholderia diazotrophica
10	AF-A0A1H0VDX3-F1-model_v4 Predicted chitinase	46	1.69e-21	Ralstonia sp. 25mfcol4.1
11	AF-A0A316IHM5-F1-model_v4 Putative chitinase	51.4	2.265e-21	Fulvimonas soli
12	AF-A0A6N4TYA1-F1-model_v4 Uncharacterized protein	51.2	2.498e-21	Burkholderia sp. THE68
13	AF-A0A5D3CC78-F1-model_v4 Putative chitinase	47.5	3.876e-21	Cucumis melo var. makuwa
14	AF-A0A2X2DKC6-F1-model_v4 Glycoside hydrolase	48.3	6.633e-21	Pseudomonas luteola
15	AF-A0A2L0X3F1-F1-model_v4 Chitinase	47.9	2.141e-20	Cupriavidus metallidurans
16	AF-N2J2S6-F1-model_v4 Uncharacterized protein	47.8	3.164e-20	Pseudomonas sp. HPB0071
17	AF-A0A5C1ZMT8-F1-model_v4 Calcium-binding protein	49.5	5.685e-20	Xanthomonas translucens pv. undulosa
18	AF-A0A0M3CVU4-F1-model_v4 EF-hand domain-containing protein	46.8	2.024e-19	Pseudomonas putida
19	AF-E5B1N5-F1-model_v4 Uncharacterized protein HI1415	53	1.223e-17	Erwinia amylovora ATCC BAA-2158
20	AF-A0A5J6QZL7-F1-model_v4 Uncharacterized protein	46.7	3.978e-18	Pseudomonas denitrificans (nom. rej.)
21	AF-A0A344KSE9-F1-model_v4 Lytic enzyme	53.6	1.561e-17	Vibrio campbellii
22	AF-A0A4R7V6P1-F1-model_v4 Putative chitinase	42.3	5.88e-18	Pseudomonas helmanticensis
23	AF-A0A7Y9WFN0-F1-model_v4 Putative chitinase	41.8	2.214e-18	Paraburkholderia bryophila
24	AF-A0A7Y8EKY7-F1-model_v4 Uncharacterized protein	44.3	1.223e-17	Pseudomonas yamanorum
25	AF-A0A7Y8FG31-F1-model_v4 EF-hand domain-containing protein	44.2	1.993e-17	Pseudomonas yamanorum
26	AF-A0A7X3HE31-F1-model_v4 Lytic enzyme	44.7	3.581e-17	Pseudomonas otitidis
27	AF-A0A4S3FRQ1-F1-model_v4 Lytic enzyme	45.2	2.651e-16	Massilia sp. Mn16-1_5
28	AF-A0A318N7W5-F1-model_v4 Lytic enzyme	39.1	1.794e-16	Commensalibacter sp. ESL0284
29	AF-A0A2D9Y7E2-F1-model_v4 PG_binding_1 domain-containing protein	36.8	1.195e-14	Candidatus Campbellbacteria bacterium
30	AF-A0A2G6GA07-F1-model_v4 PG_binding_1 domain-containing protein	31.9	1.918e-12	Candidatus Campbellbacteria bacterium
31	AF-A0A4S4BC25-F1-model_v4 Glycoside hydrolase family 19 protein	30.2	6.146e-11	Deinococcus sp. Arct2-2
32	AF-A0A7G6A3Q1-F1-model_v4 Uncharacterized protein	35.4	4.19e-12	Massilia sp. Se16.2.3
33	AF-A0A354IRC3-F1-model_v4 Lytic enzyme	46	6.453e-11	Massilia sp.
34	AF-A0A1W1VAW0-F1-model_v4 Putative chitinase	25.9	1.632e-10	Deinococcus hopiensis KR-140
35	AF-A0A368L8Z6-F1-model_v4 Glycoside hydrolase family 19 protein	30	8.65e-11	Parvibium lacunae
36	AF-A0A3S0JUC1-F1-model_v4 Glycoside hydrolase family 19 protein	27.4	1.001e-10	Deinococcus radiophilus
37	AF-F0EUW3-F1-model_v4 Uncharacterized protein	31.7	2.314e-11	Haemophilus parainfluenzae ATCC 33392
38	AF-A0A0Q9EU01-F1-model_v4 Uncharacterized protein	30.5	3.93e-10	Lysobacter sp. Root96
39	AF-A0A353FFS7-F1-model_v4 Glycoside hydrolase	31.7	2.659e-10	Cryomorphaceae bacterium
40	AF-A0A4R0XPM8-F1-model_v4 Glycoside hydrolase family 19	27.6	6.725e-10	Paraburkholderia steynii
41	AF-A0A4T1DSL0-F1-model_v4 DNA primase	32.6	4.778e-10	Stenotrophomonas maltophilia
42	AF-A0A0C2U619-F1-model_v4 Lytic enzyme	28.3	5.532e-10	Magnetospirillum magnetotacticum MS-1
43	AF-A0A323U6P3-F1-model_v4 Glycoside hydrolase family 19 protein	30.3	6.099e-10	Meiothermus sp. Pnk-1
44	AF-A0A015Y6P9-F1-model_v4 Chitinase class I family protein	33.1	3.564e-10	Bacteroides fragilis str. J-143-4
45	AF-A0A2V3V2M0-F1-model_v4 Putative chitinase	28.1	8.584e-10	Blastomonas natatoria
46	AF-A0A7X6NAS0-F1-model_v4 Type VI secretion system tip protein VgrG	33	1.342e-10	Vibrio aestuarianus
47	AF-A0A7Y5G1X0-F1-model_v4 Glycoside hydrolase family 19 protein	27.9	2.792e-10	candidate division KSB1 bacterium
48	AF-A0A3M7LQP5-F1-model_v4 Type VI secretion system tip protein VgrG	31.9	5.055e-11	Vibrio anguillarum
49	AF-A0A378RNQ1-F1-model_v4 Predicted chitinase	31.2	6.404e-10	Myroides odoratus
50	AF-A0A7K1SKT8-F1-model_v4 Glycoside hydrolase family 19 protein	30.6	2.279e-09	Spirosoma arboris
51	AF-A0A7Z7YGE7-F1-model_v4 Type VI secretion system tip protein VgrG	32.8	1.278e-10	Vibrio cholerae
52	AF-A0A523J2I7-F1-model_v4 Glycoside hydrolase family 19 protein	28.8	1.269e-09	Deltaproteobacteria bacterium
53	AF-A0A3A8QKE1-F1-model_v4 Glycoside hydrolase family 19 protein	26	9.939e-10	Corallococcus llansteffanensis
54	AF-A0A853I320-F1-model_v4 Glycoside hydrolase family 19 protein	26	9.939e-10	Endozoicomonas sp. SM1973
55	AF-A0A317MB17-F1-model_v4 Putative chitinase	28.6	8.584e-10	Chitinophaga sp. S165
56	AF-A0A375AFJ9-F1-model_v4 Phage endolysin	29.3	2.067e-09	Dickeya aquatica
57	AF-A0A117DPR9-F1-model_v4 Glycoside hydrolase family protein	27.1	4.742e-09	Deinococcus grandis
58	AF-A0A1N7K3K2-F1-model_v4 Putative chitinase	29.5	1.044e-09	Neptunomonas antarctica
59	AF-A0A4U1BMN7-F1-model_v4 LysM peptidoglycan-binding domain-containing protein	32.5	2.394e-09	Ferrimonas aestuarii
60	AF-A0A5P8P3N5-F1-model_v4 Uncharacterized protein	25	5.268e-10	Sulfurimonas lithotrophica
61	AF-A0A250DS70-F1-model_v4 Glycoside hydrolase family 19	26.9	3.9e-09	Variovorax boronicumulans
62	AF-N6Y999-F1-model_v4 Lytic enzyme	25.6	2.91e-09	Thauera sp. 27
63	AF-A0A251ZSE0-F1-model_v4 Uncharacterized protein	31.3	9.014e-10	Commensalibacter intestini
64	AF-A0A2K8QRT5-F1-model_v4 Glycoside hydrolase family 19	26.4	5.532e-10	Dickeya fangzhongdai
65	AF-W0EWB4-F1-model_v4 Lytic enzyme	29	3.208e-09	Niabella soli DSM 19437
66	AF-A0A2E4QVS9-F1-model_v4 Glyco_hydro_19_cat domain-containing protein	31.6	1.875e-09	Hirschia sp.
67	AF-A0A849UDK0-F1-model_v4 Uncharacterized protein	27.4	7.061e-10	Methylococcaceae bacterium
68	AF-A0A3P3QTS3-F1-model_v4 LysM peptidoglycan-binding domain-containing protein	25.9	9.393e-09	Pararheinheimera mesophila
69	AF-A0A1H6AWQ2-F1-model_v4 Putative chitinase	32.2	1.542e-09	Algoriphagus boritolerans DSM 17298 = JCM 18970
70	AF-A0A7W3AY70-F1-model_v4 Glycoside hydrolase family 19 protein	30.7	2.91e-09	Enterobacter hormaechei
71	AF-A0A839LDQ4-F1-model_v4 Glycoside hydrolase family 19 protein	27.3	3.208e-09	Mitsuaria sp. WAJ17
72	AF-A0A2N1F5Z8-F1-model_v4 Glycoside hydrolase family 19	33.7	2.639e-09	Tenacibaculum sp. Bg11-29
73	AF-A0A350ZX06-F1-model_v4 Glyco_hydro_19_cat domain-containing protein	29.2	1.875e-09	Thauera sp.
74	AF-A0A0J1BVM8-F1-model_v4 Glyco_hydro_19_cat domain-containing protein	31.6	1.969e-09	Flavobacterium sp. ABG
75	AF-A0A143PMA6-F1-model_v4 Putative family GH19 chitinase	33	3.369e-09	Luteitalea pratensis
76	AF-A0A0X8GMH3-F1-model_v4 Uncharacterized protein	27.4	5.49e-09	Janthinobacterium sp. B9-8
77	AF-A0A7U5E647-F1-model_v4 Abhydrolase_3 domain-containing protein	30.8	3.233e-10	Vibrio anguillarum
78	AF-A0A6A7N4M1-F1-model_v4 Glycoside hydrolase family 19 protein	30.4	1.875e-09	Rugamonas aquatica
79	AF-A0A554L8L8-F1-model_v4 Lytic enzyme	25.6	4.516e-09	Parcubacteria group bacterium Gr01-1014_3
80	AF-U3CE46-F1-model_v4 LysM domain-containing protein	32	6.356e-09	Vibrio azureus NBRC 104587
81	AF-A0A6A4UF91-F1-model_v4 Putative chitinase	32.3	1.542e-09	Ignavibacteria bacterium
82	AF-A0A855F1C3-F1-model_v4 Glycoside hydrolase family 19	28.5	4.3e-09	Raoultella ornithinolytica
83	AF-A0A7U5EDT1-F1-model_v4 Type VI secretion protein VgrG	29.6	8.175e-10	Vibrio anguillarum
84	AF-A0A1K0JE46-F1-model_v4 Uncharacterized protein	27.9	3.369e-09	Cupriavidus necator
85	AF-A0A7X9I305-F1-model_v4 Glycoside hydrolase family 19 protein	29.4	2.394e-09	Serratia sp.
86	AF-A0A0U3LH66-F1-model_v4 Glycoside hydrolase family 19	26.5	1.969e-09	Roseateles depolymerans
87	AF-A0A6L9LDJ3-F1-model_v4 Glycoside hydrolase family 19 protein	28.9	2.171e-09	Spirosoma terrae
88	AF-A0A1S2N7B3-F1-model_v4 Chitinase class I family protein	30.7	1.388e-08	Massilia timonae
89	AF-C6E6S2-F1-model_v4 Lytic enzyme	29.6	9.393e-09	Geobacter sp. M21
90	AF-A0A3D1J0H8-F1-model_v4 Glycoside hydrolase family 19	28.4	2.494e-08	Oxalobacteraceae bacterium
91	AF-A0A508AAY6-F1-model_v4 Uncharacterized protein	27.5	1.542e-09	Lysobacter aestuarii
92	AF-A0A5M8R3E3-F1-model_v4 Glycoside hydrolase family 19 protein	31.3	4.3e-09	Dyadobacter flavalbus
93	AF-A0A564FWH6-F1-model_v4 Uncharacterized protein	23.5	1.151e-09	Methylobacterium dankookense
94	AF-A0A318KYE7-F1-model_v4 Putative chitinase	32.3	1.458e-08	Rivicola pingtungensis
95	AF-A0A844WUE5-F1-model_v4 Uncharacterized protein	23.6	9.014e-10	Gilliamella sp. Pas-s27
96	AF-A0A0K1ECW6-F1-model_v4 Uncharacterized protein	24.6	1.531e-08	Chondromyces crocatus
97	AF-A0A0E3ZQW3-F1-model_v4 Putative phage lysozyme	30.8	8.945e-09	Pasteurella multocida subsp. multocida OH4807
98	AF-A0A158DVF9-F1-model_v4 Glycoside hydrolase family protein	25.4	1.036e-08	Caballeronia pedi
99	AF-A0A1V3PSJ5-F1-model_v4 Glyco_hydro_19_cat domain-containing protein	28.6	3.032e-08	Rhodanobacter sp. B05
100	AF-A0A8A6BH94-F1-model_v4 Glycoside hydrolase family 19 protein	25.4	1.954e-08	Pseudoalteromonas xiamenensis
101	AF-A0A2K4IBV5-F1-model_v4 Glycoside hydrolase family 19	28.8	1.388e-08	Pseudomonas sp. MPR-ANC1
102	AF-A0A443TVH8-F1-model_v4 EF-hand domain-containing protein	28.2	5.764e-09	Arcobacter venerupis
103	AF-A0A4Z1R3I3-F1-model_v4 Uncharacterized protein	27.4	2.771e-09	Luteimonas yindakuii
104	AF-A0A1I6HJ86-F1-model_v4 Putative chitinase	28.2	3.208e-09	Marinobacter daqiaonensis
105	AF-A0A7C9JNU0-F1-model_v4 Glycoside hydrolase family 19 protein	27	3.184e-08	Malikia spinosa
106	AF-A0A853HMK3-F1-model_v4 Glycoside hydrolase family 19 protein	26.2	9.863e-09	Azospirillum oleiclasticum
107	AF-A0A1T4SJ72-F1-model_v4 Putative chitinase	30	6.053e-09	Vibrio cincinnatiensis DSM 19608
108	AF-A0A840MWB7-F1-model_v4 Putative chitinase	25.6	4.979e-09	Chitinivorax tropicus
109	AF-A0A4R8LQD6-F1-model_v4 Putative chitinase	23.7	9.863e-09	Paraburkholderia rhizosphaerae
110	AF-A0A4R2SFX2-F1-model_v4 Putative chitinase	31.4	3.537e-09	Cricetibacter osteomyelitidis
111	AF-N6XMG7-F1-model_v4 Uncharacterized protein	27.4	2.171e-09	Thauera sp. 27
112	AF-A0A1H7YTM5-F1-model_v4 Predicted chitinase	31.4	6.053e-09	Chryseobacterium taichungense
113	AF-A0A0U5BUT1-F1-model_v4 Glycoside hydrolase family 19 protein	23.3	3.032e-08	Xanthomonas citri pv. citri
114	AF-A0A1U7P2X5-F1-model_v4 Phage endolysin	29.3	1.861e-08	Deinococcus marmoris
115	AF-A0A6J5F2F2-F1-model_v4 Uncharacterized protein	28.6	3.208e-09	Paraburkholderia humisilvae
116	AF-A0A017SZV3-F1-model_v4 Uncharacterized protein	27.8	2.494e-08	Chondromyces apiculatus DSM 436
117	AF-A0A354V6S8-F1-model_v4 Glycoside hydrolase	27	3.343e-08	Acetobacteraceae bacterium
118	AF-A0A0C2F229-F1-model_v4 Lytic enzyme	31.4	4.481e-08	Pseudomonas batumici
119	AF-A0A847NT58-F1-model_v4 Glycoside hydrolase family 19 protein	28	1.388e-08	Mollicutes bacterium
120	AF-A0A418VFK1-F1-model_v4 Uncharacterized protein	24.6	2.245e-07	Deinococcus cavernae
121	AF-A0A1I6G8C6-F1-model_v4 Putative chitinase	29.9	2.91e-09	Litoreibacter janthinus
122	AF-A0A4R2SJH7-F1-model_v4 Putative chitinase	23.7	2.279e-09	Cricetibacter osteomyelitidis
123	AF-A0A511NAD8-F1-model_v4 Uncharacterized protein	21.4	3.184e-08	Deinococcus cellulosilyticus NBRC 106333 = KACC 11606
124	AF-A0A0S2F7C1-F1-model_v4 Chitinase class I family protein	25.2	7.302e-08	Lysobacter antibioticus
125	AF-A0A4R7BG38-F1-model_v4 Putative chitinase	27.1	9.393e-09	Paludibacterium purpuratum
126	AF-A0A4Q0UBC4-F1-model_v4 Uncharacterized protein	26.3	1.688e-08	Aliarcobacter skirrowii CCUG 10374
127	AF-A0A853JGQ1-F1-model_v4 Uncharacterized protein	25.4	4.268e-08	Luteimonas salinisoli
128	AF-A0A226GZ78-F1-model_v4 Uncharacterized protein	25.5	5.49e-09	Flavobacterium hercynium
129	AF-A0A6G8NSN0-F1-model_v4 Uncharacterized protein	23.5	1.322e-08	Caballeronia sp. SBC1
130	AF-A0A6V6Z7A3-F1-model_v4 Uncharacterized protein	26.2	2.639e-09	Flavobacterium salmonis
131	AF-A0A368P782-F1-model_v4 Glycoside hydrolase family 19 protein	31.7	2.494e-08	Oceanihabitans sediminis
132	AF-A0A266M011-F1-model_v4 Lytic enzyme	26.9	1.322e-08	Pseudomonas fragi
133	AF-A0A1M4VRU7-F1-model_v4 Putative chitinase	30.5	1.199e-08	Cnuella takakiae
134	AF-A0A0T2YIH3-F1-model_v4 Glyco_hydro_19_cat domain-containing protein	26.6	2.75e-08	Hydrogenophaga sp. Root209
135	AF-A0A6L8KMT6-F1-model_v4 Glycoside hydrolase family 19 protein	24.6	4.268e-08	Duganella sp. CY15W
136	AF-A0A7W8WI83-F1-model_v4 Putative chitinase	26.5	1.388e-08	Paraburkholderia sp. WSM4180
137	AF-A0A076J9D7-F1-model_v4 Uncharacterized protein	27	5.764e-09	Pseudomonas putida
138	AF-A0A217EGR4-F1-model_v4 Predicted chitinase	25.4	1.036e-08	Acinetobacter apis
139	AF-A0A1G0HY28-F1-model_v4 Glyco_hydro_19_cat domain-containing protein	28.7	5.721e-08	Gammaproteobacteria bacterium RIFCSPHIGHO2_12_FULL_63_22
140	AF-A0A257S9C0-F1-model_v4 Glyco_hydro_19_cat domain-containing protein	23.9	2.138e-07	Acidiphilium sp. 21-60-14
141	AF-A0A1L1PH70-F1-model_v4 Putative lysozyme	22.8	5.188e-08	Hydrogenophaga intermedia
142	AF-Q9RZ37-F1-model_v4 Glycohydrolase, putative	22.8	2.75e-08	Deinococcus radiodurans R1
143	AF-A0A1T4Y0S9-F1-model_v4 Predicted chitinase	25	2.262e-08	Prosthecobacter debontii
144	AF-A0A1V3JP93-F1-model_v4 Uncharacterized protein	27	5.49e-09	Rodentibacter genomosp. 2
145	AF-A0A0Q6S9Y5-F1-model_v4 Uncharacterized protein	22	7.727e-09	Massilia sp. Root335
146	AF-A0A2E5ZN30-F1-model_v4 Uncharacterized protein	27.4	1.079e-07	Flavobacteriaceae bacterium
147	AF-A0A4Q8S0W8-F1-model_v4 EF-hand domain-containing protein	24	1.142e-08	Marinilabiliaceae bacterium JC017
148	AF-A0A1I1X869-F1-model_v4 Predicted chitinase	25.2	4.706e-08	Nannocystis exedens
149	AF-A0A3T0SBJ4-F1-model_v4 Uncharacterized protein	26.8	4.742e-09	Pseudomonadaceae bacterium SI-3
150	AF-A0A1R1J8H9-F1-model_v4 Uncharacterized protein	28.5	5.764e-09	Burkholderia ubonensis
151	AF-A0A0B6FN09-F1-model_v4 Putative eF hand domain protein	26.3	3.871e-08	Yersinia frederiksenii Y225
152	AF-K0JI41-F1-model_v4 Glycoside hydrolase family 19	28.2	3.511e-08	Brachyspira pilosicoli WesB
153	AF-A0A855RPE9-F1-model_v4 Calcium-binding protein	28.9	1.142e-08	Photobacterium damselae subsp. damselae
154	AF-A0A2S0IC35-F1-model_v4 Uncharacterized protein	27.5	2.262e-08	Achromobacter spanius
155	AF-A0A2S6ZDT3-F1-model_v4 DNA primase	26.3	3.511e-08	Xanthomonas theicola
156	AF-G2HY68-F1-model_v4 Putative chitinase	29.9	2.262e-08	Arcobacter sp. L
157	AF-A0A5C0VK21-F1-model_v4 Glycoside hydrolase family 19 protein	30	3.032e-08	Pedobacter aquae
158	AF-A0A2N8QDG0-F1-model_v4 Uncharacterized protein	26.3	1.322e-08	Paraburkholderia fungorum
159	AF-A0A1G9XSX5-F1-model_v4 Predicted chitinase	28.9	6.674e-09	Stutzerimonas balearica DSM 6083
160	AF-A0A6I6M6Y1-F1-model_v4 Glycoside hydrolase family 19 protein	24.4	3.871e-08	Pseudoduganella flava
161	AF-A0A0Q7R3Y0-F1-model_v4 Uncharacterized protein	24.4	8.052e-08	Brevundimonas sp. Root1423
162	AF-A0A7X0F5F4-F1-model_v4 Putative chitinase	27.3	8.052e-08	Aminobacter aganoensis
163	AF-A0A7Y0ADD2-F1-model_v4 Uncharacterized protein	24.5	8.052e-08	Hymenobacter polaris
164	AF-A0A2N7W1U0-F1-model_v4 Uncharacterized protein	27.7	7.727e-09	Trinickia soli
165	AF-A0A1M4XY69-F1-model_v4 Predicted chitinase	28.5	1.036e-08	Chryseobacterium takakiae
166	AF-A0A2E4EDS5-F1-model_v4 Glycoside hydrolase	32.3	9.788e-08	Crocinitomicaceae bacterium
167	AF-F5RC29-F1-model_v4 Glyco_hydro_19_cat domain-containing protein	24	7.668e-08	Methyloversatilis universalis FAM5
168	AF-A0A356JY00-F1-model_v4 Uncharacterized protein	25.8	4.268e-08	Treponema sp.
169	AF-F2NYH9-F1-model_v4 Uncharacterized protein	24.2	6.623e-08	Treponema succinifaciens DSM 2489
170	AF-A0A504J3H1-F1-model_v4 Glycoside hydrolase family 19 protein	26.4	8.454e-08	Aquimarina algicola
171	AF-A0A1Q9QX61-F1-model_v4 Uncharacterized protein	25.8	4.979e-09	Pseudomonas putida
172	AF-A0A1I5UZK0-F1-model_v4 Putative chitinase	32.4	8.052e-08	Sphingomonas rubra
173	AF-A0A2N6FQ02-F1-model_v4 EF-hand domain-containing protein	27.7	2.262e-08	Arcobacter sp.
174	AF-A0A0N0JU86-F1-model_v4 Glyco_hydro_19_cat domain-containing protein	30.9	1.519e-07	beta proteobacterium AAP99
175	AF-A0A3M8SXD4-F1-model_v4 PG_binding_1 domain-containing protein	24.5	9.322e-08	Lysobacter psychrotolerans
176	AF-A0A328T0D8-F1-model_v4 Uncharacterized protein	25	9.393e-09	Oleiagrimonas sp. MCCC 1A03011
177	AF-A0A246BTH8-F1-model_v4 Uncharacterized protein	22.8	1.028e-07	Deinococcus indicus
178	AF-F6CWU7-F1-model_v4 Uncharacterized protein	27.3	2.262e-08	Marinomonas posidonica IVIA-Po-181
179	AF-A0A423P9F2-F1-model_v4 EF-hand domain-containing protein	28.2	1.688e-08	Pseudomonas fluorescens
180	AF-A0A7Z1KXB0-F1-model_v4 Glycoside hydrolase	25	7.302e-08	Janthinobacterium sp. BJB412
181	AF-A0A2G0VN88-F1-model_v4 Chitinase	27	6.356e-09	Pseudomonas sp. ICMP 460
182	AF-A0A2V6T5M4-F1-model_v4 Glycoside hydrolase family 19	27.1	1.028e-07	Candidatus Rokubacteria bacterium
183	AF-A0A1X7I4L6-F1-model_v4 Putative chitinase	25.6	5.448e-08	Paraburkholderia susongensis
184	AF-A0A226X668-F1-model_v4 Lytic enzyme	25.5	4.268e-08	Caballeronia sordidicola
185	AF-A0A0K1ECJ4-F1-model_v4 Uncharacterized protein	27.5	4.064e-08	Chondromyces crocatus
186	AF-A0A2N4YG44-F1-model_v4 Phage_Mu_F domain-containing protein	25.7	3.686e-08	Tabrizicola sp. TH137
187	AF-A0A0A1YIQ8-F1-model_v4 EF-hand domain-containing protein	26.4	1.259e-08	Pseudomonas taeanensis MS-3
188	AF-A0A4V2F084-F1-model_v4 Putative chitinase	22.8	4.033e-07	Pseudobacter ginsenosidimutans
189	AF-A0A809H4M1-F1-model_v4 Uncharacterized protein	25	5.961e-07	[Mycobacterium] chelonae subsp. gwanakae
190	AF-A0A3A9VJR6-F1-model_v4 LysM peptidoglycan-binding domain-containing protein	23.4	4.481e-08	Aquimarina sp. AD10
191	AF-A0A1M6E5F3-F1-model_v4 Putative chitinase	23.9	6.623e-08	Aureimonas altamirensis DSM 21988
192	AF-A0A7Z2W023-F1-model_v4 Uncharacterized protein	22.6	6.954e-08	Massilia forsythiae
193	AF-A0A6I4NRL5-F1-model_v4 Uncharacterized protein	21.9	1.531e-08	Flavobacterium hydrocarbonoxydans
194	AF-A0A7Y2PYF2-F1-model_v4 Glycoside hydrolase family 19	26	1.954e-08	Acinetobacter sp. ANC 5414
195	AF-A0A4Z1AYU2-F1-model_v4 Uncharacterized protein	21.6	1.531e-08	Empedobacter tilapiae
196	AF-A0A1N6LPS1-F1-model_v4 Predicted chitinase	26.4	2.052e-08	Burkholderia sp. GAS332
197	AF-A0A6J4EDA1-F1-model_v4 Uncharacterized protein	26.4	1.322e-08	Pseudomonas tohonis
198	AF-A0A2K9NI96-F1-model_v4 Endolysin	26.7	6.007e-08	Niveispirillum cyanobacteriorum
199	AF-A5FGP2-F1-model_v4 Glycoside hydrolase family 19	25.4	3.686e-08	Flavobacterium johnsoniae UW101
200	AF-A0A552U9X6-F1-model_v4 Glycoside hydrolase family 19 protein	25.7	1.447e-07	Glacieibacterium frigidum
201	AF-A0A3N0VLV6-F1-model_v4 Glycoside hydrolase family 19 protein	24.7	1.759e-07	Stagnimonas aquatica
202	AF-Q8ZQH4-F1-model_v4 Putative Fels-1 prophage chitinase	28.3	7.302e-08	Salmonella enterica subsp. enterica serovar Typhimurium str. LT2
203	AF-Q87UT8-F1-model_v4 EF hand domain protein	24.6	1.954e-08	Pseudomonas syringae pv. tomato str. DC3000
204	AF-A0A4P7A8R4-F1-model_v4 Glycoside hydrolase family 19 protein	27.7	2.729e-07	Herbaspirillum huttiense
205	AF-A0A7Z2Z4D7-F1-model_v4 EF-hand domain-containing protein	22.2	5.764e-09	Aeromonas hydrophila
206	AF-E0SF81-F1-model_v4 EF hand domain protein	23.6	6.623e-08	Dickeya dadantii 3937
207	AF-A0A848FF36-F1-model_v4 Glycoside hydrolase family 19 protein	20.1	3.009e-07	Azohydromonas caseinilytica
208	AF-A9MN02-F1-model_v4 EF-hand domain-containing protein	25.7	9.322e-08	Salmonella enterica subsp. arizonae serovar 62:z4,z23:-
209	AF-A0A6S6QM92-F1-model_v4 Uncharacterized protein	22.2	2.357e-07	Terrihabitans soli
210	AF-A0A4Q0UH99-F1-model_v4 Uncharacterized protein	23.9	3.184e-08	Arcobacter defluvii
211	AF-A0A0Q0AGB6-F1-model_v4 EF hand domain protein	26.7	1.954e-08	Pseudomonas syringae pv. solidagae
212	AF-A0A6I1U8Y1-F1-model_v4 Peptidoglycan DD-metalloendopeptidase family protein	25.3	2.619e-08	Pseudomonas sp. SZ57
213	AF-A0A1M7L1E1-F1-model_v4 Putative chitinase	30.6	5.188e-08	Flavobacterium chilense
214	AF-A0A4Q0Y0Y7-F1-model_v4 Uncharacterized protein	25.2	5.721e-08	Halarcobacter anaerophilus
215	AF-A0A4P8HVY2-F1-model_v4 Putative chitinase	25	6.007e-08	Pseudoduganella umbonata
216	AF-A0A423ES90-F1-model_v4 EF-hand domain-containing protein	22.8	1.607e-08	Pseudomonas poae
217	AF-A0A1T1BSE0-F1-model_v4 Uncharacterized protein	18.3	2.888e-08	Flavobacterium sp. LM4
218	AF-A0A1Y0M6L5-F1-model_v4 Uncharacterized protein	23.7	9.322e-08	Polaribacter sp. SA4-10
219	AF-A0A1H4E446-F1-model_v4 Predicted chitinase	23.3	5.448e-08	Chitinophaga terrae (ex Kim and Jung 2007)
220	AF-A0A2W5ECW6-F1-model_v4 Glycohydrolase	22.7	1.759e-07	Pseudopedobacter saltans
221	AF-A0A5T8WQ64-F1-model_v4 Uncharacterized protein	25.7	1.133e-07	Salmonella enterica
222	AF-A0A7R7Z9H1-F1-model_v4 Uncharacterized protein	24.4	4.706e-08	Pseudomonas alcaligenes
223	AF-A0A660LXP1-F1-model_v4 Glycoside hydrolase family 19 protein	33.1	2.599e-07	Candidatus Saccharimonas sp.
224	AF-A0A7U9F5S2-F1-model_v4 Lytic enzyme	29.9	2.475e-07	Pseudomonas alcaligenes OT 69
225	AF-A0A5E6P719-F1-model_v4 Glyco_hydro_19_cat domain-containing protein	26.6	5.407e-07	Pseudomonas fluorescens
226	AF-A0A679GDI2-F1-model_v4 Uncharacterized protein	24.5	3.343e-08	Pseudomonas otitidis
227	AF-A0A1H0WXC3-F1-model_v4 Predicted chitinase	27.3	2.619e-08	Pseudomonas guguanensis
228	AF-A0A7Y5I3X9-F1-model_v4 Glycoside hydrolase family 19 protein	24.8	1.519e-07	Pseudanabaena biceps
229	AF-A0A7W3U526-F1-model_v4 Glycoside hydrolase family 19 protein	25.9	8.052e-08	Lysobacter penaei
230	AF-A0A3G9FZA3-F1-model_v4 Phage protein	23.8	9.788e-08	Asticcacaulis excentricus
231	AF-A0A5C7BYA2-F1-model_v4 Uncharacterized protein	22.9	4.941e-08	Serratia marcescens
232	AF-A0A853JH95-F1-model_v4 Calcium-binding protein	25.6	5.188e-08	Luteimonas salinisoli
233	AF-A0A7W7NXQ4-F1-model_v4 Putative chitinase	24.1	2.357e-07	Novosphingobium chloroacetimidivorans
234	AF-A0A1Y1SYD5-F1-model_v4 Lytic enzyme	28.7	9.322e-08	Zunongwangia atlantica 22II14-10F7
235	AF-J2LZI2-F1-model_v4 Putative chitinase	28.5	1.312e-07	Pantoea sp. GM01
236	AF-A0A2L0EYF8-F1-model_v4 Uncharacterized protein	22.3	2.138e-07	Sorangium cellulosum
237	AF-A0A1I4ZAJ8-F1-model_v4 Predicted chitinase	20.3	2.75e-08	Pseudomonas sp. ok602
238	AF-A0A1Z4F176-F1-model_v4 Lysozyme	25	1.181e-06	[Mycobacterium] stephanolepidis
239	AF-A0A7D7VNR8-F1-model_v4 Uncharacterized protein	24.7	4.941e-08	Flavobacteriaceae bacterium
240	AF-A0A1I5W5V9-F1-model_v4 Predicted chitinase	22.6	6.307e-08	Pseudarcicella hirudinis
241	AF-A0A495GV59-F1-model_v4 Putative chitinase	26.2	8.878e-08	Paraburkholderia sediminicola
242	AF-A0A158L147-F1-model_v4 Glycoside hydrolase family protein	24.2	6.307e-08	Caballeronia arvi
243	AF-A0A0P0DZ97-F1-model_v4 Uncharacterized protein	25.7	5.149e-07	Sphingopyxis macrogoltabida
244	AF-A0A2N8EL48-F1-model_v4 EF-hand domain-containing protein	24.3	3.871e-08	Pseudomonas sp. FW305-131
245	AF-A0A2P1VPN0-F1-model_v4 Uncharacterized protein	21.8	1.861e-08	Plesiomonas shigelloides
246	AF-A0A2S3WF94-F1-model_v4 Glycoside hydrolase family 19	25.5	6.259e-07	Pseudomonas putida
247	AF-A0A7C9QT91-F1-model_v4 Glycoside hydrolase family 19 protein	23.7	1.378e-07	Magnetospirillum aberrantis SpK
248	AF-A0A4U9HCI0-F1-model_v4 Predicted chitinase	26.2	4.706e-08	Serratia rubidaea
249	AF-A0A4P7R235-F1-model_v4 LysM peptidoglycan-binding domain-containing protein	24.6	1.847e-07	Sphingomonas sp. PAMC26645
250	AF-A0A651E1M0-F1-model_v4 Glycoside hydrolase family 19 protein	24.1	1.436e-06	Leptolyngbya sp. DLM2.Bin15
251	AF-A0A497WSH5-F1-model_v4 Putative chitinase	23.2	3.686e-08	Pseudomonas asplenii
252	AF-K8B3G2-F1-model_v4 EF-hand domain-containing protein	25.4	7.302e-08	Cronobacter dublinensis 1210
253	AF-A0A1M7DKY1-F1-model_v4 Predicted chitinase	22.7	1.133e-07	Chitinophaga jiangningensis
254	AF-A0A1I5MXM3-F1-model_v4 Putative chitinase	23	4.447e-07	Pseudarcicella hirudinis
255	AF-A0A086XRN2-F1-model_v4 Uncharacterized protein	26.1	1.028e-07	Paenirhodobacter enshiensis
256	AF-A0A653B4B2-F1-model_v4 Predicted chitinase	20.7	3.871e-08	Pseudomonas oleovorans
257	AF-C9QG57-F1-model_v4 Uncharacterized protein	24.5	3.686e-08	Vibrio orientalis CIP 102891 = ATCC 33934
258	AF-A0A2U8FQ98-F1-model_v4 Glycoside hydrolase family 19	22	3.658e-07	Aquabacterium olei
259	AF-A0A7X3H9U9-F1-model_v4 Glycoside hydrolase family 19 protein	25.7	1.312e-07	Pseudomonas otitidis
260	AF-A0A7K0JGR1-F1-model_v4 Uncharacterized protein	23.1	2.599e-07	Phocaeicola vulgatus
261	AF-A0A4Q1KDR4-F1-model_v4 Uncharacterized protein	26.6	3.009e-07	Flavobacterium stagni
262	AF-J2YI06-F1-model_v4 Putative chitinase	24.3	4.706e-08	Pseudomonas sp. GM24
263	AF-A0A3G6TNN0-F1-model_v4 Peptidase_M23 domain-containing protein	24.1	2.619e-08	Chryseobacterium balustinum
264	AF-A0A2X3I6P2-F1-model_v4 Putative glycoside hydrolase	32.1	2.729e-07	Klebsiella pneumoniae
265	AF-A0A7V9DYG9-F1-model_v4 Glycoside hydrolase family 19 protein	23.7	2.138e-07	Burkholderiaceae bacterium
266	AF-A0A848HK97-F1-model_v4 Glycoside hydrolase family 19 protein	23.4	6.954e-08	Massilia polaris
267	AF-A0A2W6VLY9-F1-model_v4 Glycoside hydrolase family 19	24.4	1.367e-06	Sphingomonas sp.
268	AF-B4W0P6-F1-model_v4 Glyco_hydro_19_cat domain-containing protein	24	3.841e-07	Coleofasciculus chthonoplastes PCC 7420
269	AF-A0A7C9M8B0-F1-model_v4 Glycoside hydrolase family 19 protein	24.2	3.16e-07	Deinococcus arboris
270	AF-A0A1L6I4B6-F1-model_v4 Uncharacterized protein	28.7	6.954e-08	Paraburkholderia sp. SOS3
271	AF-A0A1W1UX33-F1-model_v4 Putative chitinase	26.8	5.149e-07	Deinococcus hopiensis KR-140
272	AF-A0A423KEQ9-F1-model_v4 Uncharacterized protein	20.3	1.133e-07	Pseudomonas frederiksbergensis
273	AF-A0A7W4D9P1-F1-model_v4 Uncharacterized protein	24.1	1.378e-07	Pseudomonas guryensis
274	AF-A0A4Y8BR01-F1-model_v4 Glycoside hydrolase family 19 protein	27.9	1.595e-07	Campylobacter sp. US33a
275	AF-A0A496KQ03-F1-model_v4 LysM peptidoglycan-binding domain-containing protein	25.5	1.675e-07	Neisseria sp.
276	AF-A0A3N5XGV9-F1-model_v4 Glycoside hydrolase family 19 protein	33.6	2.729e-07	Dehalococcoidia bacterium
277	AF-A0A4R0PKP3-F1-model_v4 Type VI secretion system protein TssA	20.4	3.184e-08	Pseudomonas sp. IC_126
278	AF-A0A209B2B6-F1-model_v4 Uncharacterized protein	22.7	2.599e-07	Yersinia frederiksenii
279	AF-A0A838L7R3-F1-model_v4 Glycoside hydrolase family 19 protein	23.9	2.599e-07	Sphingomonas chungangi
280	AF-A0A1C0B574-F1-model_v4 Uncharacterized protein	27.3	8.878e-08	Aliarcobacter thereius
281	AF-I3Z4M3-F1-model_v4 Putative chitinase	28.4	1.939e-07	Belliella baltica DSM 15883
282	AF-I2B6W7-F1-model_v4 EF-hand domain-containing protein	24	1.312e-07	Shimwellia blattae DSM 4481 = NBRC 105725
283	AF-A0A4S3YGT8-F1-model_v4 Chitinase	25.2	7.668e-08	Pseudomonas atacamensis
284	AF-A0A848HMP3-F1-model_v4 Glycoside hydrolase family 19 protein	24.5	3.841e-07	Massilia polaris
285	AF-A0A2A4R3G4-F1-model_v4 PG_binding_1 domain-containing protein	24.3	6.573e-07	Hyphomicrobiales bacterium
286	AF-A0A4P7WY14-F1-model_v4 Uncharacterized protein	21.8	4.268e-08	Psychroserpens sp. NJDZ02
287	AF-A0A1G6IK64-F1-model_v4 Predicted chitinase	21.3	5.721e-08	Pseudomonas chengduensis
288	AF-A0A6B3UPH8-F1-model_v4 Glycoside hydrolase family 19 protein	25.2	1.02e-06	Caulobacter sp. 17J65-9
289	AF-A0A1L7ALF8-F1-model_v4 Uncharacterized protein	23.3	1.447e-07	Roseomonas gilardii
290	AF-A0A3D9CMV8-F1-model_v4 Peptidase_M23 domain-containing protein	24.7	4.268e-08	Chryseobacterium flavum
291	AF-A0A2G3JEJ2-F1-model_v4 Lytic enzyme	28	2.475e-07	Iodobacter sp. BJB302
292	AF-A0A6J5FH05-F1-model_v4 Glyco_hydro_19_cat domain-containing protein	22.5	1.759e-07	Paraburkholderia caffeinitolerans
293	AF-A0A7Z0P8Y2-F1-model_v4 Uncharacterized protein	24.2	6.307e-08	Pseudomonas sp. SbOxS1
294	AF-A0A258YN27-F1-model_v4 Uncharacterized protein	27.6	8.454e-08	Sphingobacteriia bacterium 24-36-13
295	AF-A0A1J5H1D3-F1-model_v4 Glyco_hydro_19_cat domain-containing protein	24.1	2.021e-06	Oscillatoriales cyanobacterium CG2_30_44_21
296	AF-B9USE1-F1-model_v4 Endolysin	29	3.16e-07	Brachyspira intermedia
297	AF-A0A329H6B8-F1-model_v4 Glycoside hydrolase family 19 protein	26.9	2.475e-07	Enterobacter sp. RIT 418
298	AF-F2NE75-F1-model_v4 Peptidoglycan-binding domain 1 protein	18	7.61e-07	Desulfobacca acetoxidans DSM 11109
299	AF-U2BA02-F1-model_v4 Uncharacterized protein	20.4	4.706e-08	Pseudomonas sp. EGD-AK9
300	AF-A0A514C5T0-F1-model_v4 Glycoside hydrolase family 19 protein	30.5	2.599e-07	Brevundimonas sp. M20
301	AF-A0A0X3AN89-F1-model_v4 Predicted chitinase	24.5	1.675e-07	Apibacter mensalis
302	AF-A0A2S7WMJ9-F1-model_v4 Uncharacterized protein	25.4	6.573e-07	Polaribacter porphyrae
303	AF-A0A1Z4JS80-F1-model_v4 Putative glycohydrolase	25.1	6.954e-08	Leptolyngbya boryana NIES-2135
304	AF-A0A1V4LN17-F1-model_v4 Uncharacterized protein	23.1	1.939e-07	Pseudomonas sp. VI4.1
305	AF-A0A246F5F1-F1-model_v4 Uncharacterized protein	23.7	1.447e-07	Pseudomonas nitroreducens
306	AF-A0A840C160-F1-model_v4 Putative chitinase	22.7	5.961e-07	Chelatococcus caeni
307	AF-A0A2V4AY63-F1-model_v4 Putative chitinase	22.3	4.67e-07	Prauserella muralis
308	AF-A0A0T9UF44-F1-model_v4 Putative endolysin	24.4	1.595e-07	Yersinia enterocolitica
309	AF-A9E9U9-F1-model_v4 Uncharacterized protein	24.8	3.484e-07	Kordia algicida OT-1
310	AF-A0A350IBY7-F1-model_v4 Glycoside hydrolase family 19	30	1.02e-06	Saprospirales bacterium
311	AF-A0A6J5EWQ2-F1-model_v4 Uncharacterized protein	24.8	9.322e-08	Paraburkholderia solisilvae
312	AF-A0A1A7KIB3-F1-model_v4 Peptidase family M23	22.8	6.623e-08	Chryseobacterium sp. MOF25P
313	AF-A0A5B6TGS4-F1-model_v4 Uncharacterized protein	24.1	4.67e-07	Rufibacter hautae
314	AF-A0A0U1KI05-F1-model_v4 Putative endolysin	24.2	5.149e-07	Yersinia mollaretii
315	AF-A0A1H1X442-F1-model_v4 Predicted chitinase	22.5	1.847e-07	Pseudomonas umsongensis
316	AF-A0A2E8NUW9-F1-model_v4 Uncharacterized protein	26.4	3.484e-07	Euryarchaeota archaeon
317	AF-A0A1M4UIF0-F1-model_v4 Putative chitinase	27.6	8.39e-07	Dysgonomonas macrotermitis
318	AF-A0A7X9FIF0-F1-model_v4 Glycoside hydrolase family 19 protein	22.4	2.475e-07	Desulfovibrio sp.
319	AF-A0A5C7LW93-F1-model_v4 Glycoside hydrolase family 19 protein	28.8	6.902e-07	Hyphomicrobiaceae bacterium
320	AF-F9ZTP3-F1-model_v4 Chinitase domain protein	25.2	1.595e-07	Acidithiobacillus caldus SM-1
321	AF-A0A0S4P9Y1-F1-model_v4 Chaperone protein DnaK	30.7	2.036e-07	Janthinobacterium sp. CG23_2
322	AF-A0A430GYB8-F1-model_v4 Glycoside hydrolase family 19 protein	26.3	1.367e-06	Variovorax sp. 679
323	AF-A0A4V2Q2X0-F1-model_v4 Putative chitinase	24	3.16e-07	Sodalis ligni
324	AF-A0A1G6MAT0-F1-model_v4 Putative chitinase	21.1	3.812e-06	Williamwhitmania taraxaci
325	AF-A0A4Q9VI24-F1-model_v4 Glycoside hydrolase family 19 protein	21.9	4.235e-07	Siculibacillus lacustris
326	AF-A0A7Y0BYZ7-F1-model_v4 Glycoside hydrolase family 19 protein	30.3	4.033e-07	Polaromonas sp.
327	AF-A0A1H4AZB7-F1-model_v4 Predicted chitinase	23.4	8.39e-07	Bizionia paragorgiae
328	AF-A0A3G2IKU8-F1-model_v4 EF-hand domain-containing protein	24.4	2.729e-07	Buttiauxella sp. 3AFRM03
329	AF-A0A7K1FYA1-F1-model_v4 Glyco_hydro_19_cat domain-containing protein	21.7	1.519e-07	Flavobacterium sp. LC2016-13
330	AF-A0A352AQ06-F1-model_v4 DUF4231 domain-containing protein	18.8	4.203e-06	Cyanobacteria bacterium UBA9273
331	AF-A0A127NVX2-F1-model_v4 Peptidase C39-like family protein	19.3	2.122e-06	Corynebacterium simulans
332	AF-A0A3D4WHL9-F1-model_v4 Uncharacterized protein	24.6	2.729e-07	Psychrobacter sp.
333	AF-L8N6P4-F1-model_v4 Glycoside hydrolase family 19	25.3	2.456e-06	Pseudanabaena biceps PCC 7429
334	AF-A0A078AT44-F1-model_v4 Glycoside hydrolase family protein	20.7	5.916e-06	Stylonychia lemnae
335	AF-A0A1S1HCN4-F1-model_v4 Glyco_hydro_19_cat domain-containing protein	24	2.456e-06	Sphingomonas haloaromaticamans
336	AF-A0A0F4NCW9-F1-model_v4 Calcium-binding protein	25.1	3.009e-07	Vibrio neptunius
337	AF-A0A6S6PBD3-F1-model_v4 Peptidase_M15_4 domain-containing protein	18.9	2.228e-06	Mycolicibacterium litorale
338	AF-A0A6L7IK48-F1-model_v4 Uncharacterized protein	25.3	5.407e-07	Flavobacteriaceae bacterium W22
339	AF-A0A4D7QS29-F1-model_v4 Glycoside hydrolase family 19 protein	28.9	2.228e-06	Phreatobacter sp. NMCR1094
340	AF-A0A8B4XK26-F1-model_v4 Putative chitinase	24.4	5.365e-06	Xanthomonas vasicola
341	AF-A0A3S4PHR5-F1-model_v4 Predicted chitinase	25.7	3.484e-07	Chryseobacterium gleum
342	AF-A0A327KQB0-F1-model_v4 Uncharacterized protein	22.1	1.125e-06	Rhodoplanes elegans
343	AF-A0A1M5CW97-F1-model_v4 Predicted chitinase	22.7	2.866e-07	Chryseobacterium arachidis
344	AF-A0A1S9B053-F1-model_v4 Uncharacterized protein	25.6	1.181e-06	Hymenobacter sp. CRA2
345	AF-A0A540WMB1-F1-model_v4 Glycoside hydrolase family 19 protein	20.1	5.634e-06	Myxococcus llanfairpwllgwyngyllgogerychwyrndrobwllllantysiliogogogochensis
346	AF-A0A1B9M6M0-F1-model_v4 Uncharacterized protein	22.4	1.675e-07	Gilliamella apicola
347	AF-A0A1G5MGA6-F1-model_v4 Putative chitinase	21.8	1.745e-06	Afifella marina DSM 2698
348	AF-A0A7D4BG23-F1-model_v4 Uncharacterized protein	25.8	3.658e-07	Tenuifilum thalassicum
349	AF-Q0RZW9-F1-model_v4 Peptidase_C39_2 domain-containing protein	19.6	8.39e-07	Rhodococcus jostii RHA1
350	AF-A0A1E5QL45-F1-model_v4 Uncharacterized protein	22.2	9.251e-07	Desertifilum sp. IPPAS B-1220
351	AF-A0A1G0TDC2-F1-model_v4 Uncharacterized protein	30.2	9.714e-07	Ignavibacteria bacterium RBG_16_35_7
352	AF-A0A101CFM5-F1-model_v4 Uncharacterized protein	26.3	9.714e-07	Chryseobacterium aquaticum subsp. greenlandense
353	AF-A0A7D7ZQ66-F1-model_v4 Glyco_hydro_19_cat domain-containing protein	26.1	4.67e-07	Flavobacteriaceae bacterium
354	AF-A0A1N6EGG0-F1-model_v4 Predicted chitinase	24.7	3.841e-07	Paraburkholderia phenazinium
355	AF-A0A250DIG0-F1-model_v4 Glyco_hydro_19_cat domain-containing protein	25.3	1.924e-06	Variovorax boronicumulans
356	AF-A0A4V1T5D2-F1-model_v4 Uncharacterized protein	23.3	4.003e-06	Sphingobacteriales bacterium
357	AF-A0A3S0B7A5-F1-model_v4 Glycoside hydrolase family 19 protein	25.4	1.02e-06	Rickettsiales bacterium
358	AF-A0A7K1WXG5-F1-model_v4 Uncharacterized protein	22.7	5.961e-07	Flavobacterium sp. HBTb2-11-1
359	AF-A0A1V2W3A7-F1-model_v4 Glyco_hydro_19_cat domain-containing protein	24.8	1.583e-06	Burkholderia cenocepacia
360	AF-A0A1V2V447-F1-model_v4 Uncharacterized protein	25.5	4.67e-07	Acinetobacter genomosp. 33YU
361	AF-A0A1H8S4S8-F1-model_v4 Putative chitinase	21.5	8.81e-07	Rhodopseudomonas pseudopalustris
362	AF-A0A357KLE6-F1-model_v4 Uncharacterized protein	22.7	5.961e-07	Gammaproteobacteria bacterium
363	AF-A0A1E4LS01-F1-model_v4 Uncharacterized protein	25.3	6.902e-07	Acetobacteraceae bacterium SCN 69-10
364	AF-A0A848GX15-F1-model_v4 Uncharacterized protein	21.1	6.259e-07	Chitinophaga fulva
365	AF-A0A212QPM0-F1-model_v4 Putative chitinase	25.6	3.457e-06	Arboricoccus pini
366	AF-V8QMZ9-F1-model_v4 Chitinase	26.5	4.033e-07	Advenella kashmirensis W13003
367	AF-A0A1H2PSB3-F1-model_v4 Putative chitinase	23.7	7.99e-07	Chitinasiproducens palmae
368	AF-A0A4Q3NNW1-F1-model_v4 Glycoside hydrolase	22.9	4.634e-06	Cytophagaceae bacterium
369	AF-J0PVX3-F1-model_v4 Uncharacterized protein	21.4	1.367e-06	Bartonella sp. DB5-6
370	AF-A0A3D5YT26-F1-model_v4 Uncharacterized protein	22.9	1.436e-06	Neisseriales bacterium
371	AF-A0A658BL16-F1-model_v4 Peptidoglycan-binding protein	17.7	2.579e-06	Nitrosomonadales bacterium
372	AF-F9ZTN9-F1-model_v4 Lytic enzyme	19	3.658e-07	Acidithiobacillus caldus SM-1
373	AF-A0A0J5KRC0-F1-model_v4 Uncharacterized protein	23	3.318e-07	Pluralibacter gergoviae
374	AF-A0A704QWL6-F1-model_v4 Uncharacterized protein	24.8	5.407e-07	Salmonella enterica
375	AF-Q1QNE6-F1-model_v4 Putative glycohydrolase	23.7	6.259e-07	Nitrobacter hamburgensis X14
376	AF-A0A2N9YH13-F1-model_v4 Peptidoglycan-binding protein	20.8	3.63e-06	Beggiatoa leptomitoformis
377	AF-A0A6A8QA39-F1-model_v4 Uncharacterized protein	27.4	4.67e-07	Balneolaceae bacterium
378	AF-A0A1E7YM65-F1-model_v4 Uncharacterized protein	18.6	2.866e-07	Acidithiobacillus caldus
379	AF-A0A6P0TAS0-F1-model_v4 DUF4231 domain-containing protein	21.7	2.986e-06	Cyanothece sp. SIO2G6
380	AF-A0A1M3ECE7-F1-model_v4 Uncharacterized protein	21.5	4.67e-07	Bacteroidetes bacterium 43-16
381	AF-A0A260UFF6-F1-model_v4 Uncharacterized protein	20.9	4.634e-06	Rhodococcus fascians
382	AF-A0A7T9GKP8-F1-model_v4 Glyco_hydro_19_cat domain-containing protein	24.5	7.61e-07	Acidobacteria bacterium
383	AF-A0A3D0HY99-F1-model_v4 Chitinase	20.1	4.413e-06	Bacteroidales bacterium
384	AF-A0A846FV64-F1-model_v4 Glycoside hydrolase family 19 protein	23.8	5.365e-06	Cyanothece sp. SIO1E1
385	AF-A0A139A6M7-F1-model_v4 Glycoside hydrolase family 19 protein	27.2	1.833e-06	Gonapodya prolifera JEL478
386	AF-A0A1G5MIB4-F1-model_v4 Putative chitinase	23.5	1.745e-06	Afifella marina DSM 2698
387	AF-A0A202C482-F1-model_v4 Glyco_hydro_19_cat domain-containing protein	23.1	2.456e-06	Chryseobacterium mucoviscidosis
388	AF-A0A1H4NU50-F1-model_v4 Putative chitinase	23.6	1.172e-05	Pseudomonas mohnii
389	AF-A0A158KAQ9-F1-model_v4 Glycoside hydrolase family protein	23.3	5.961e-07	Caballeronia choica
390	AF-A0A2H1YCJ6-F1-model_v4 Uncharacterized protein	21.7	1.847e-07	Tenacibaculum finnmarkense
391	AF-A0A1I5Z0M3-F1-model_v4 Predicted chitinase	20.9	1.759e-07	Pseudarcicella hirudinis
392	AF-A0A2N5DQ23-F1-model_v4 Uncharacterized protein	23.9	2.708e-06	Caulobacter zeae
393	AF-A0A355DZC0-F1-model_v4 Glyco_hydro_19_cat domain-containing protein	19.5	2.986e-06	Cyanobacteria bacterium UBA11162
394	AF-A0A162DV08-F1-model_v4 Glyco_hydro_19_cat domain-containing protein	20.7	3.63e-06	Mycobacterium ostraviense
395	AF-A0A3B7BYW7-F1-model_v4 Uncharacterized protein	19.8	1.302e-06	Aquimarina sp. AD1
396	AF-E9T0N0-F1-model_v4 Chitinase class I	18.7	1.833e-06	Prescottella equi ATCC 33707
397	AF-A0A1Y6CZE3-F1-model_v4 Predicted chitinase	23.4	2.122e-06	Methylomagnum ishizawai
398	AF-A0A7I7QKE0-F1-model_v4 Glyco_hydro_19_cat domain-containing protein	20.7	6.849e-06	Mycolicibacterium sediminis
399	AF-A0A1Y5MSP7-F1-model_v4 Uncharacterized protein	25.1	1.249e-07	Campylobacter concisus
400	AF-A0A1C4CWH0-F1-model_v4 Predicted chitinase	22.4	2.729e-07	Gilliamella intestini
401	AF-A0A2S8ZL20-F1-model_v4 Uncharacterized protein	22.1	2.866e-07	Chryseobacterium sp. MYb7
402	AF-A0A484GAH0-F1-model_v4 Uncharacterized protein	23.2	4.904e-07	Candidatus Schmidhempelia bombi str. Bimp
403	AF-A0A1M5LZH2-F1-model_v4 Predicted chitinase	17.1	9.251e-07	Flavobacterium sp. CF108
404	AF-A0A431IZL5-F1-model_v4 Uncharacterized protein	25.2	2.579e-06	Flavobacteriaceae bacterium
405	AF-A0A2T5NWX7-F1-model_v4 NlpC/P60 domain-containing protein	26	6.573e-07	Chromobacterium haemolyticum
406	AF-A0A0Q6V2N2-F1-model_v4 Uncharacterized protein	26.8	1.833e-06	Caulobacter sp. Root343
407	AF-A0A1A3PFI9-F1-model_v4 Glyco_hydro_19_cat domain-containing protein	21.6	5.11e-06	Mycobacterium sp. 1245111.1
408	AF-A0A7H2V014-F1-model_v4 Glycoside hydrolase family 19	23.9	9.251e-07	Acinetobacter seifertii
409	AF-A0A6P1D8A1-F1-model_v4 Glycoside hydrolase family 19 protein	23.2	1.181e-06	Nocardia cyriacigeorgica
410	AF-A0A4V2QF48-F1-model_v4 Putative chitinase	26.1	7.247e-07	Rhizobium sp. BK251
411	AF-E8WJ98-F1-model_v4 Glycoside hydrolase family 19	23.4	7.93e-06	Geobacter sp. M18
412	AF-A0A5N7UTH2-F1-model_v4 Uncharacterized protein	24.7	4.447e-07	Chryseobacterium sp.
413	AF-A0A1B9M0Y9-F1-model_v4 Uncharacterized protein	16.5	3.812e-06	Gilliamella apicola
414	AF-R4USM3-F1-model_v4 Putative secreted chitinase	22.2	3.136e-06	Mycobacteroides abscessus subsp. bolletii 50594
415	AF-A0A4U1IV12-F1-model_v4 Serine protease	23.6	3.293e-06	Polyangium fumosum
416	AF-A0A5D4FNK5-F1-model_v4 Basic endochitinase	18.8	4.203e-06	Corynebacterium urealyticum
417	AF-K5BJE9-F1-model_v4 Peptidase C39 like family protein	19.3	1.02e-06	Mycolicibacterium hassiacum DSM 44199
418	AF-A0A7S9UHP5-F1-model_v4 LysM peptidoglycan-binding domain-containing protein	22.4	1.292e-05	Massilia antarctica
419	AF-C1D6N5-F1-model_v4 Lytic enzyme	23.4	3.293e-06	Laribacter hongkongensis HLHK9
420	AF-A0A736I8B2-F1-model_v4 Uncharacterized protein	20.5	7.93e-06	Salmonella enterica subsp. houtenae serovar 44:z36[z38]:-
421	AF-A0A6P2CMV5-F1-model_v4 Glyco_hydro_19_cat domain-containing protein	21.3	1.063e-05	Rhodococcus rhodnii
422	AF-A0A483LVB5-F1-model_v4 Uncharacterized protein	24.7	3.457e-06	Klebsiella pneumoniae
423	AF-A0A350Y8X9-F1-model_v4 Glyco_hydro_19_cat domain-containing protein	19.7	4.866e-06	Cyanobacteria bacterium UBA11370
424	AF-A0A2S9CMW2-F1-model_v4 Uncharacterized protein	25.1	9.714e-07	Chryseobacterium culicis
425	AF-A0A504JD61-F1-model_v4 DUF4280 domain-containing protein	23.8	4.67e-07	Aquimarina algicola
426	AF-A0A850BKR8-F1-model_v4 Peptidoglycan-binding protein	21.9	1.24e-06	Polyangiaceae bacterium
427	AF-A0A1I5W332-F1-model_v4 Predicted chitinase	22.9	1.181e-06	Pseudarcicella hirudinis
428	AF-A0A379K5U9-F1-model_v4 Lysozyme	27.2	4.866e-06	Pseudomonas oleovorans
429	AF-A0A3D0WRG2-F1-model_v4 Chitinase	23.8	2.339e-06	Porphyromonadaceae bacterium
430	AF-J0QVH3-F1-model_v4 Uncharacterized protein	21.8	2.844e-06	Bartonella rattimassiliensis 15908
431	AF-I3CCF5-F1-model_v4 Putative chitinase	17.5	6.849e-06	Beggiatoa alba B18LD
432	AF-A0A2S1YME2-F1-model_v4 Uncharacterized protein	18.8	9.251e-07	Flavobacterium crocinum
433	AF-A0A0Q4Y0P4-F1-model_v4 Glyco_hydro_19_cat domain-containing protein	20.7	1.732e-05	Pseudorhodoferax sp. Leaf267
434	AF-A0A263D7I3-F1-model_v4 Glyco_hydro_19_cat domain-containing protein	19.3	4.413e-06	Amycolatopsis antarctica
435	AF-A0A516WS70-F1-model_v4 Glyco_hydro_19_cat domain-containing protein	21.8	2.456e-06	Rhodococcus sp. WB9
436	AF-A0A3C0AWD5-F1-model_v4 Uncharacterized protein	22.1	5.407e-07	Flavobacterium sp.
437	AF-A0A2E9QPT1-F1-model_v4 Uncharacterized protein	22.6	6.849e-06	Deltaproteobacteria bacterium
438	AF-A0A0N9VBK8-F1-model_v4 Chitinase	23.5	8.81e-07	Acinetobacter equi
439	AF-A0A2K4MQ98-F1-model_v4 NlpC/P60 domain-containing protein	23.3	3.136e-06	Chromobacterium sinusclupearum
440	AF-D0SNX4-F1-model_v4 Uncharacterized protein	22.1	2.339e-06	Acinetobacter junii SH205
441	AF-A0A0G2ZII7-F1-model_v4 Membrane-bound lytic murein transglycosylase D	23.2	4.634e-06	Archangium gephyra
442	AF-W0BP28-F1-model_v4 Chitinase	23.3	2.986e-06	Enterobacter ludwigii
443	AF-A0A353Q604-F1-model_v4 Chitinase	25	2.339e-06	Porphyromonadaceae bacterium
444	AF-A0A2T4VQY9-F1-model_v4 Peptidoglycan-binding protein	23.5	5.634e-06	Vitiosangium sp. GDMCC 1.1324
445	AF-A0A1B9P0H2-F1-model_v4 Uncharacterized protein	18.5	5.634e-06	Aliivibrio logei
446	AF-A0A255W849-F1-model_v4 Lysozyme	23.2	4.634e-06	Pseudomonas mandelii
447	AF-A0A2S2CKP1-F1-model_v4 Glycoside hydrolase family 19	28.6	2.339e-06	Azospirillum thermophilum
448	AF-A0A4Y9R8T9-F1-model_v4 Glycoside hydrolase family 19 protein	24.3	3.136e-06	Brevundimonas sp. S30B
449	AF-A0A7V3F8N3-F1-model_v4 LysM peptidoglycan-binding domain-containing protein	23.3	7.552e-06	bacterium
450	AF-A0A1Y0G589-F1-model_v4 Uncharacterized protein	24.8	5.634e-06	Sulfuriferula sp. AH1
451	AF-A0A1Q3HYL8-F1-model_v4 Glyco_hydro_19_cat domain-containing protein	23.6	4.413e-06	Archangium sp. Cb G35
452	AF-A0A498CGP7-F1-model_v4 Putative chitinase	23.5	5.916e-06	Stenotrophomonas rhizophila
453	AF-A0A1I0LA10-F1-model_v4 Putative chitinase	25.2	3.293e-06	Stigmatella erecta
454	AF-A0A2I0FSK9-F1-model_v4 Uncharacterized protein	26	6.849e-06	Enterobacterales bacterium CwR94
455	AF-A0A528X283-F1-model_v4 Peptidase_M15_4 domain-containing protein	17.5	1.571e-05	Mesorhizobium sp.
456	AF-A0A1D9G8U6-F1-model_v4 Uncharacterized protein	17.4	9.64e-06	Moorena producens JHB
457	AF-A0A355UQ03-F1-model_v4 LysM domain-containing protein	18.9	3.431e-05	Cyanobacteria bacterium UBA8530
458	AF-A0A2A2GNR6-F1-model_v4 Serine protease	17.8	1.425e-05	Paracoccus salipaludis
459	AF-A0A2E9QWU6-F1-model_v4 Uncharacterized protein	19.5	4.413e-06	Deltaproteobacteria bacterium
460	AF-A0A1A7KI92-F1-model_v4 Peptidase family M23	21	1.924e-06	Chryseobacterium sp. MOF25P
461	AF-A0A0N0LIQ6-F1-model_v4 Uncharacterized protein	21.2	1.367e-06	Chryseobacterium sp. ERMR1:04
462	AF-A0A7Y4QXK8-F1-model_v4 Chitinase	20.3	9.181e-06	Ignavibacteria bacterium
463	AF-A0A0S3U6J5-F1-model_v4 Glycoside hydrolase, family 19	22	4.003e-06	Leptolyngbya sp. NIES-3755
464	AF-A0A4Q5YIK7-F1-model_v4 Glyco_hydro_19_cat domain-containing protein	24.6	1.662e-06	Chitinophagaceae bacterium
465	AF-A0A6L3SU12-F1-model_v4 Glycoside hydrolase family 19 protein	26	6.849e-06	Methylobacterium soli
466	AF-A0A7D4BZH6-F1-model_v4 Uncharacterized protein	23	1.125e-06	Tenuifilum thalassicum
467	AF-H1SB90-F1-model_v4 Chitinase-like protein	24.5	2.339e-06	Cupriavidus basilensis OR16
468	AF-A0A840BFW7-F1-model_v4 Putative chitinase	24	3.457e-06	Niveibacterium umoris
469	AF-A0A7X1TW46-F1-model_v4 Chitinase	20	8.743e-06	Betaproteobacteria bacterium
470	AF-A0A346YKY4-F1-model_v4 Chitinase	23.4	3.293e-06	Neorhizobium sp. SOG26
471	AF-A0A370H5R6-F1-model_v4 Putative chitinase	24	3.812e-06	Nocardia mexicana
472	AF-A0A519LH17-F1-model_v4 Peptidase_M23 domain-containing protein	23.3	1.302e-06	Flavobacterium sp.
473	AF-A0A5N5VKT7-F1-model_v4 Uncharacterized protein	17.9	1.063e-05	Mycolicibacterium mucogenicum DSM 44124
474	AF-A0A484GEW4-F1-model_v4 Uncharacterized protein	48.8	5.634e-06	Candidatus Schmidhempelia bombi str. Bimp
475	AF-A0A495FX70-F1-model_v4 Putative chitinase	21.1	1.732e-05	Paraburkholderia sediminicola
476	AF-A0A736I4T9-F1-model_v4 Uncharacterized protein	23.6	9.251e-07	Salmonella enterica subsp. houtenae serovar 44:z36[z38]:-
477	AF-A0A1B8R6J9-F1-model_v4 Phage endolysin	21.9	3.783e-05	Rhizobium leguminosarum bv. trifolii
478	AF-A0A5Y3Q770-F1-model_v4 Uncharacterized protein	26	1.436e-06	Salmonella enterica subsp. arizonae
479	AF-A0A1X0J2B1-F1-model_v4 Peptidase_M15_4 domain-containing protein	21.3	1.063e-05	Mycobacteroides saopaulense
480	AF-A0A7G5CV67-F1-model_v4 Uncharacterized protein	24.3	1.425e-05	Ewingella americana
481	AF-A0A257IX82-F1-model_v4 Fibronectin type-III domain-containing protein	23.5	9.714e-07	Cytophagaceae bacterium BCCC1
482	AF-A0A7W9DH42-F1-model_v4 Putative chitinase	24	2.005e-05	Janthinobacterium sp. S3M3
483	AF-A0A1V5ITE7-F1-model_v4 Chitinase class I	22.1	3.812e-06	Bacteroidetes bacterium ADurb.BinA104
484	AF-A0A1I5Z243-F1-model_v4 Predicted chitinase	20.5	4.904e-07	Pseudarcicella hirudinis
485	AF-A0A838A087-F1-model_v4 Uncharacterized protein	19.5	3.63e-06	Mycobacteroides sp. LB1
486	AF-A0A4Q3GEM4-F1-model_v4 Glycoside hydrolase family 19 protein	23.9	2.322e-05	Hyphomicrobiales bacterium
487	AF-A0A2S7FMZ0-F1-model_v4 Glyco_hydro_19_cat domain-containing protein	28	4.866e-06	Pseudomonas oleovorans
488	AF-A0A0P6VL12-F1-model_v4 PG_binding_1 domain-containing protein	22.4	2.228e-06	Prosthecomicrobium hirschii
489	AF-A0A7Y4PAF8-F1-model_v4 Basic endochitinase	18	5.916e-06	Corynebacterium ulcerans
490	AF-A0A246GFV0-F1-model_v4 DUF5675 domain-containing protein	19.9	1.302e-06	Flavobacterium columnare
491	AF-A0A482IP72-F1-model_v4 Chitinase	19.9	8.743e-06	Cupriavidus metallidurans
492	AF-A0A4C3GAJ5-F1-model_v4 Uncharacterized protein	23.2	1.116e-05	Escherichia coli
493	AF-A0A1M5NSK9-F1-model_v4 Putative chitinase	17.2	7.552e-06	Bradyrhizobium erythrophlei
494	AF-A0A5C7PXF4-F1-model_v4 Uncharacterized protein	17.9	1.116e-05	Desulfurellales bacterium
495	AF-A0A2T4VQQ4-F1-model_v4 Uncharacterized protein	18.8	8.327e-06	Vitiosangium sp. GDMCC 1.1324
496	AF-A0A0X8WX03-F1-model_v4 Chitinase class I	25.6	9.64e-06	Leptolyngbya sp. O-77
497	AF-A0A4R3EE59-F1-model_v4 Putative chitinase	23.7	1.012e-05	Bosea sp. BK604
498	AF-A0A821EZP2-F1-model_v4 Hypothetical protein	23.3	6.849e-06	Rotaria sp. Silwood2
499	AF-A0A4S5EDN9-F1-model_v4 Glyco_hydro_19_cat domain-containing protein	18.2	5.11e-06	Rhodococcus qingshengii
500	AF-A0A2A3DCW4-F1-model_v4 PG_binding_1 domain-containing protein	21.3	9.64e-06	Mesorhizobium sp. WSM3860
501	AF-B1WPV6-F1-model_v4 Uncharacterized protein	19.1	2.005e-05	Crocosphaera subtropica ATCC 51142
502	AF-A0A318UV35-F1-model_v4 Putative chitinase	21.9	1.231e-05	Pedobacter nutrimenti
503	AF-A0A3S5YGX0-F1-model_v4 Chitinase	26.6	2.844e-06	Salmonella enterica subsp. arizonae serovar 18:z4,z23:- str. CVM N26626
504	AF-A0A085WWN3-F1-model_v4 Membrane-bound lytic murein transglycosylase D	21.9	9.64e-06	Hyalangium minutum
505	AF-A0A3M4KBA7-F1-model_v4 Prophage PSPPH01, chitinase	22.5	6.212e-06	Pseudomonas syringae pv. delphinii
506	AF-G0HAJ7-F1-model_v4 Uncharacterized protein	17.5	1.496e-05	Corynebacterium variabile DSM 44702
507	AF-A0A239GZY3-F1-model_v4 Putative chitinase	20.1	7.192e-06	Rhodococcus kyotonensis
508	AF-A0A426QY17-F1-model_v4 Glyco_hydro_19_cat domain-containing protein	19.8	2.708e-06	Rhodococcus sp. Eu-32
509	AF-A0A6L3SZ36-F1-model_v4 PG_binding_1 domain-containing protein	25.1	1.819e-05	Methylobacterium soli
510	AF-A0A365XXD7-F1-model_v4 Uncharacterized protein	23.9	3.63e-06	Chitinophaga flava
511	AF-A0A077ZTD2-F1-model_v4 Glycoside hydrolase family protein	23.5	5.365e-06	Stylonychia lemnae
512	AF-A0A356KH37-F1-model_v4 Peptidoglycan-binding protein	20	1.732e-05	Planctomycetota bacterium
513	AF-A0A6A5BSH0-F1-model_v4 Glyco_hydro_19_cat domain-containing protein	21.8	6.523e-06	Naegleria fowleri
514	AF-A0A2W5VAY2-F1-model_v4 Uncharacterized protein	24.1	2.005e-05	Archangium gephyra
515	AF-A0A379SD19-F1-model_v4 Predicted chitinase	21	3.268e-05	Salmonella enterica
516	AF-A0A2G8MYJ5-F1-model_v4 Chitinase	20	1.292e-05	Pseudomonas sp. 382
517	AF-A0A4U1I5T0-F1-model_v4 Peptidoglycan-binding protein	17.2	2.106e-05	Trinickia sp. 7GSK02
518	AF-A0A5R1MUZ7-F1-model_v4 Basic endochitinase	17.5	5.916e-06	Corynebacterium silvaticum
519	AF-A0A3M1PG24-F1-model_v4 Glycoside hydrolase family 19 protein	23.7	6.212e-06	Cyanobacteria bacterium J069
520	AF-A0A1C2DKX9-F1-model_v4 Glyco_hydro_19_cat domain-containing protein	27.2	4.003e-06	Stutzerimonas xanthomarina
521	AF-A0A1I0E9E3-F1-model_v4 Predicted chitinase	25.4	8.743e-06	Nitrosomonas marina
522	AF-W5XWT2-F1-model_v4 Uncharacterized protein	17.6	1.231e-05	Corynebacterium casei LMG S-19264
523	AF-A0A4R5P3Y7-F1-model_v4 Uncharacterized protein	19.8	3.63e-06	Mycobacteroides franklinii
524	AF-L8M6U3-F1-model_v4 Putative chitinase	19.9	2.106e-05	Xenococcus sp. PCC 7305
525	AF-A0A4V2NWL7-F1-model_v4 N-acetylmuramoyl-L-alanine amidase domain-containing protein	24.6	2.339e-06	Flaviaesturariibacter flavus
526	AF-A0A4R7ABN9-F1-model_v4 Putative chitinase	20.1	3.603e-05	Mycobacterium sp. OK889
527	AF-A0A4R1L9F7-F1-model_v4 Putative chitinase	22.2	2.322e-05	Pusillimonas sp. YR330
528	AF-A0A085WGA7-F1-model_v4 Membrane-bound lytic murein transglycosylase D	22.8	1.172e-05	Hyalangium minutum
529	AF-A0A3D0PCH5-F1-model_v4 VanY domain-containing protein	17.7	2.438e-05	Synechococcales bacterium UBA8647
530	AF-A0A521FIZ6-F1-model_v4 Predicted chitinase	20.9	2.708e-06	Chryseobacterium rhizoplanae
531	AF-A0A226GZZ9-F1-model_v4 Uncharacterized protein	23.2	2.708e-06	Flavobacterium hercynium
532	AF-A0A316EER0-F1-model_v4 Putative chitinase	20	1.571e-05	Arcicella aurantiaca
533	AF-A0A084XW03-F1-model_v4 Putative chitinase	18.8	3.431e-05	Candidatus Accumulibacter vicinus
534	AF-A0A4R6SJA9-F1-model_v4 Putative chitinase	22.1	8.327e-06	Labedaea rhizosphaerae
535	AF-A0A6L7GBC7-F1-model_v4 Peptidoglycan-binding protein	21.6	2.456e-06	Pseudooceanicola sp. GBMRC 2024
536	AF-A0A1P8UWJ1-F1-model_v4 Putative chitinase	22.9	4.171e-05	Salipiger abyssi
537	AF-A0A1J5H5H1-F1-model_v4 Uncharacterized protein	19.5	1.91e-05	Oscillatoriales cyanobacterium CG2_30_44_21
538	AF-A0A1Y6C0F2-F1-model_v4 Putative chitinase	23.1	2.688e-05	Pseudogulbenkiania subflava DSM 22618
539	AF-A0A7W9UFL5-F1-model_v4 Putative chitinase	21.4	8.743e-06	Nocardia transvalensis
540	AF-A0A1B7L387-F1-model_v4 EF-hand domain-containing protein	19.8	6.849e-06	Mangrovibacter phragmitis
541	AF-A0A2P5LIT0-F1-model_v4 LysM domain-containing protein	22	3.972e-05	Methylobacter sp.
542	AF-A0A168W0Y5-F1-model_v4 Uncharacterized protein	17.4	1.357e-05	Phormidium willei BDU 130791
543	AF-A0A800M4X9-F1-model_v4 Glycoside hydrolase family 19 protein	23.9	6.849e-06	Bacteroidetes bacterium
544	AF-T2GCV8-F1-model_v4 Putative baseplate assembly protein W	21.3	1.116e-05	Megalodesulfovibrio gigas DSM 1382 = ATCC 19364
545	AF-A0A7C9Q0W9-F1-model_v4 Glyco_hydro_19_cat domain-containing protein	19.6	5.071e-05	Oscillatoria sp. SIO1A7
546	AF-A0A4Y7Z1F9-F1-model_v4 Uncharacterized protein	24.2	4.413e-06	Escherichia coli
547	AF-I3PCM7-F1-model_v4 Putative lysozyme glycoside hydrolase family protein	19.5	3.268e-05	Variovorax sp. HH01
548	AF-A0A3A8PYN9-F1-model_v4 Glycoside hydrolase family 19 protein	22.6	9.181e-06	Corallococcus aberystwythensis
549	AF-A0A5S4EJY3-F1-model_v4 Phage endolysin	19.9	1.231e-05	Candidatus Accumulibacter phosphatis
550	AF-A0A1Q6BRZ1-F1-model_v4 Peptidase_C39_2 domain-containing protein	19.9	3.112e-05	Corynebacterium glutamicum
551	AF-A0A1I3IQ17-F1-model_v4 Uncharacterized protein	21.9	4.866e-06	Halpernia frigidisoli
552	AF-W6RS59-F1-model_v4 Putative chitinase	22.7	5.071e-05	Rhizobium favelukesii
553	AF-A0A7Z1V637-F1-model_v4 Glycoside hydrolase family 19	22.2	2.688e-05	Azospirillum brasilense
554	AF-A0A285UXT9-F1-model_v4 Putative chitinase	22.7	5.591e-05	Rhizobium subbaraonis
555	AF-D2VMQ6-F1-model_v4 Predicted protein	21.8	1.172e-05	Naegleria gruberi
556	AF-A0A679JU29-F1-model_v4 PG_binding_1 domain-containing protein	16.1	4.413e-06	Hyphomicrobium sp. ghe19
557	AF-A0A1M6PHN5-F1-model_v4 Predicted chitinase	18.8	9.64e-06	Chryseobacterium polytrichastri
558	AF-D2VBA0-F1-model_v4 Predicted protein	19.2	8.743e-06	Naegleria gruberi
559	AF-A0A2N3XZ01-F1-model_v4 Putative chitinase	18.4	4.413e-06	Saccharopolyspora spinosa
560	AF-A0A7R7AMQ5-F1-model_v4 Uncharacterized protein	23.8	5.916e-06	Mesorhizobium sp. 113-1-2
561	AF-A0A7W0UYF9-F1-model_v4 Peptidoglycan-binding protein	22.5	2.005e-05	Pyrinomonadaceae bacterium
562	AF-A0A1W9I729-F1-model_v4 PG_binding_1 domain-containing protein	28.1	2.106e-05	Proteobacteria bacterium HN_bin10
563	AF-K1RJM4-F1-model_v4 Lysozyme	22.1	4.829e-05	human gut metagenome
564	AF-A0A7V8ZJI7-F1-model_v4 Glycoside hydrolase family 19 protein	26.6	8.263e-05	Solirubrobacterales bacterium
565	AF-A0A6A5BVE6-F1-model_v4 Glyco_hydro_19_cat domain-containing protein	21	9.64e-06	Naegleria fowleri
566	AF-A0A2I8QMF6-F1-model_v4 Glycoside hydrolase	21.5	1.496e-05	Enterobacteriaceae bacterium ENNIH2
567	AF-A0A1W9HC14-F1-model_v4 Uncharacterized protein	20.1	9.181e-06	Proteobacteria bacterium SG_bin6
568	AF-A0A1H8J8K5-F1-model_v4 Putative chitinase	23.5	4.203e-06	Nitrosomonas marina
569	AF-A0A3D9AZT6-F1-model_v4 Uncharacterized protein	20.7	3.63e-06	Chryseobacterium piscium
570	AF-A0A370I0Y1-F1-model_v4 Putative chitinase	23.7	2.322e-05	Nocardia pseudobrasiliensis
571	AF-A0A1B1ALW6-F1-model_v4 Uncharacterized protein	28.1	2.228e-06	Candidatus Viadribacter manganicus
572	AF-A0A1S1LIL2-F1-model_v4 Chitinase	20	2.438e-05	Mycobacteroides chelonae
573	AF-A0A6H1TWP9-F1-model_v4 Peptidase_C39_2 domain-containing protein	18.4	2.56e-05	Oxynema aestuarii AP17
574	AF-A3YYS2-F1-model_v4 Putative peptidoglycan binding domain 1	16.8	3.972e-05	Synechococcus sp. WH 5701
575	AF-A0A817M124-F1-model_v4 Hypothetical protein	23.4	2.322e-05	Rotaria sp. Silwood2
576	AF-A0A7D7V7T3-F1-model_v4 Uncharacterized protein	18.8	1.819e-05	Gordonia rubripertincta
577	AF-A0A1Y0G6Y8-F1-model_v4 Uncharacterized protein	25	5.11e-06	Sulfuriferula sp. AH1
578	AF-A0A7I7R8A7-F1-model_v4 Bacteriophage protein	20.6	3.603e-05	Mycolicibacter minnesotensis
579	AF-A0A847SJR9-F1-model_v4 DUF4280 domain-containing protein	23.6	1.24e-06	Chitinophaga eiseniae
580	AF-L7UBP9-F1-model_v4 Class I chitinase	19.5	9.567e-05	Myxococcus stipitatus DSM 14675
581	AF-A0A1L6LFA3-F1-model_v4 Membrane-bound lytic murein transglycosylase D	21.1	1.571e-05	Minicystis rosea
582	AF-A0A1I5X9C9-F1-model_v4 Putative chitinase	22.7	9.64e-06	Parafilimonas terrae
583	AF-A0A1E4DMI0-F1-model_v4 Uncharacterized protein	18.8	2.822e-05	Methylobacterium sp. SCN 67-24
584	AF-A0A375YXX6-F1-model_v4 Peptidase_C39_2 domain-containing protein	20.2	3.112e-05	Mycobacterium shimoidei
585	AF-A0A5B1B106-F1-model_v4 Uncharacterized protein	20.9	7.192e-06	Aquimarina sp. RZ0
586	AF-A0A380CEM2-F1-model_v4 Predicted chitinase	26	7.552e-06	Sphingobacterium spiritivorum
587	AF-A0A6P0YX59-F1-model_v4 Peptidoglycan-binding protein	17	6.165e-05	Merismopedia sp. SIO2A8
588	AF-Q1CVS9-F1-model_v4 Chitinase, class I	20.6	9.64e-06	Myxococcus xanthus DK 1622
589	AF-A0A8B2BSU1-F1-model_v4 Uncharacterized protein	20.8	6.849e-06	Prevotella melaninogenica
590	AF-A0A1M4W6B2-F1-model_v4 Predicted chitinase	20.8	6.849e-06	Chryseobacterium vrystaatense
591	AF-A0A1V4XWR3-F1-model_v4 Uncharacterized protein	24.6	1.819e-05	Syntrophus sp. PtaB.Bin001
592	AF-A0A3A8GR70-F1-model_v4 Glycoside hydrolase family 19 protein	23.2	1.357e-05	Corallococcus sp. AB011P
593	AF-A0A6M0A8T4-F1-model_v4 Glycoside hydrolase family 19 protein	17.9	1.116e-05	Okeania sp. SIO3B5
594	AF-A0A0M6Y9U5-F1-model_v4 Putative chitinase	19.7	1.231e-05	Roseibium aggregatum
595	AF-A0A6A5B8Y5-F1-model_v4 SH3b domain-containing protein	19.5	1.231e-05	Naegleria fowleri
596	AF-A0A444VY26-F1-model_v4 Glycoside hydrolase	21.6	1.357e-05	Flavobacterium anhuiense
597	AF-A0A1L7NPW5-F1-model_v4 Lytic enzyme	26.3	1.91e-05	Pseudomonas putida
598	AF-A0A840MZV1-F1-model_v4 Putative chitinase	22.6	4.829e-05	Chitinivorax tropicus
599	AF-A0A1B3NLT1-F1-model_v4 Peptidoglycan-binding 1 domain protein	18.3	1.116e-05	Bosea sp. RAC05
600	AF-A0A7G9QMZ5-F1-model_v4 Uncharacterized protein	22.2	1.436e-06	Pedobacter roseus
601	AF-A0A101CQZ3-F1-model_v4 DUF5675 domain-containing protein	23	6.523e-06	Flavobacteriaceae bacterium CRH
602	AF-A0A2A2B7U1-F1-model_v4 LysM domain-containing protein	23.1	1.172e-05	Psychrobacter sp. JB193
603	AF-A0A3C0XAC4-F1-model_v4 Glyco_hydro_19_cat domain-containing protein	23.6	1.571e-05	Stenotrophomonas sp.
604	AF-A0A2E9AX19-F1-model_v4 Uncharacterized protein	21.6	2.211e-05	Pseudomonas sp.
605	AF-A0A504BUZ6-F1-model_v4 Glycoside hydrolase family 19 protein	21.4	8.677e-05	Mesorhizobium sp. B2-1-3A
606	AF-A0A227ND01-F1-model_v4 Uncharacterized protein	24	1.571e-05	Flavobacterium araucananum
607	AF-A0A7Z0CY35-F1-model_v4 Putative chitinase	17.8	1.231e-05	Microlunatus terrae
608	AF-A0A3N2F1S8-F1-model_v4 Putative chitinase	20.2	6.523e-06	Chryseobacterium nakagawai
609	AF-K8GP44-F1-model_v4 Putative chitinase	21	0.0001221	Leptolyngbyaceae cyanobacterium JSC-12
610	AF-A0A522R073-F1-model_v4 Uncharacterized protein	22.3	7.93e-06	Chitinophagaceae bacterium
611	AF-A0A1M5BB02-F1-model_v4 TIGR02594 family protein	20.8	2.456e-06	Pedobacter caeni
612	AF-A0A3D6EHQ1-F1-model_v4 Uncharacterized protein	16.3	0.0001347	Holophagaceae bacterium
613	AF-A0A427K5Y4-F1-model_v4 Glyco_hydro_19_cat domain-containing protein	20.4	2.56e-05	Erwinia sp. 198
614	AF-A0A3M1P6I9-F1-model_v4 Glycoside hydrolase family 19 protein	18.8	1.231e-05	Bacteroidetes bacterium
615	AF-A0A848A737-F1-model_v4 Glycoside hydrolase family 19 protein	19.6	8.327e-06	Verrucomicrobia bacterium
616	AF-A0A820AHM2-F1-model_v4 Hypothetical protein	21.4	2.438e-05	Rotaria magnacalcarata
617	AF-A0A542HJN9-F1-model_v4 Putative chitinase	21.3	3.431e-05	Phycicoccus sp. SLBN-51
618	AF-A0A3A8P171-F1-model_v4 LysM peptidoglycan-binding domain-containing protein	21.1	2.964e-05	Corallococcus llansteffanensis
619	AF-A0A1X0A4E3-F1-model_v4 Peptidase_M15_4 domain-containing protein	18.4	6.165e-05	Mycobacterium aquaticum
620	AF-U3A488-F1-model_v4 Uncharacterized protein	21.3	9.567e-05	Vibrio proteolyticus NBRC 13287
621	AF-A0A411DQR3-F1-model_v4 Peptidase_M23 domain-containing protein	20.8	9.181e-06	Chryseobacterium indologenes
622	AF-A0A2T1LT79-F1-model_v4 Glyco_hydro_19_cat domain-containing protein	19.7	7.869e-05	Aphanothece hegewaldii CCALA 016
623	AF-A0A845XAK1-F1-model_v4 Uncharacterized protein	16.1	6.797e-05	Spirulina sp. SIO3F2
624	AF-A0A4Q7TH75-F1-model_v4 Putative chitinase	20.4	1.649e-05	Bradyrhizobium sp. BK707
625	AF-S3IX33-F1-model_v4 EF-hand domain-containing protein	19.8	9.181e-06	Cedecea davisae DSM 4568
626	AF-A0A2S8ADZ0-F1-model_v4 LysM domain-containing protein	21.9	5.11e-06	Apibacter adventoris
627	AF-A0A846ADR9-F1-model_v4 Uncharacterized protein	22.3	3.431e-05	Leptolyngbya sp. SIO4C5
628	AF-A0A1X9Z1V6-F1-model_v4 Uncharacterized protein	21	8.327e-06	Sphingobacteriaceae bacterium GW460-11-11-14-LB5
629	AF-A0A2R7PY95-F1-model_v4 DNA primase	29.3	5.591e-05	Stenotrophomonas sp. HMWF022
630	AF-A0A814Z504-F1-model_v4 Hypothetical protein	21.7	4.171e-05	Adineta steineri
631	AF-A0A1I5YYG4-F1-model_v4 Predicted chitinase	25.5	8.743e-06	Pseudarcicella hirudinis
632	AF-A0A143PKM9-F1-model_v4 Putative family GH19 chitinase	19.9	2.688e-05	Luteitalea pratensis
633	AF-A0A1I2X2J3-F1-model_v4 Putative chitinase	20	2.005e-05	Paracoccus aminovorans
634	AF-A0A1Y0FVK0-F1-model_v4 Uncharacterized protein	18.4	5.871e-05	Cellvibrio sp. PSBB006
635	AF-A0A1G6UCX6-F1-model_v4 Chitinase class I	16.2	9.181e-06	Williamwhitmania taraxaci
636	AF-A0A1G6MV18-F1-model_v4 Predicted chitinase	19.8	1.357e-05	Variovorax sp. CF079
637	AF-A0A1Q9VXV0-F1-model_v4 Peptidase_C39_2 domain-containing protein	22.1	5.071e-05	Corynebacterium sp. CNJ-954
638	AF-A0A6C2YT43-F1-model_v4 Uncharacterized protein	18.3	2.964e-05	Tuwongella immobilis
639	AF-A0A554UDY6-F1-model_v4 Uncharacterized protein	21.3	6.473e-05	Mycobacterium sp. KBS0706
640	AF-A0A0G2ZNT5-F1-model_v4 Membrane-bound lytic murein transglycosylase D	20.4	7.137e-05	Archangium gephyra
641	AF-A0A4R1CED4-F1-model_v4 Peptidase_M15_4 domain-containing protein	18.7	9.111e-05	Nocardioides jejuensis
642	AF-A0A2N8QLD6-F1-model_v4 Uncharacterized protein	20.2	6.165e-05	Paraburkholderia fungorum
643	AF-A0A2U1JXG8-F1-model_v4 Glycoside hydrolase	24.5	0.0001005	Flavobacterium laiguense
644	AF-A0A6N6ZW30-F1-model_v4 Putative chitinase	21.2	9.111e-05	Rhodospirillaceae bacterium
645	AF-A0A814PAW5-F1-model_v4 Hypothetical protein	19.9	7.869e-05	Rotaria sordida
646	AF-A6UAM1-F1-model_v4 Chitinase-like protein	21.8	1.012e-05	Sinorhizobium medicae WSM419
647	AF-A0A0Q6D2X3-F1-model_v4 Uncharacterized protein	24.4	1.357e-05	Methylobacterium sp. Leaf456
648	AF-A0A7K0DEU4-F1-model_v4 Glyco_hydro_19_cat domain-containing protein	20.7	3.112e-05	Nocardia macrotermitis
649	AF-A0A3R9YZH7-F1-model_v4 Glyco_hydro_19_cat domain-containing protein	21.3	1.732e-05	Variovorax sp. DXTD-1
650	AF-A0A2E8PLW7-F1-model_v4 Uncharacterized protein	19.9	8.263e-05	Rhodobacteraceae bacterium
651	AF-A0A1M5G7P6-F1-model_v4 Predicted chitinase	21.7	5.916e-06	Chryseobacterium vrystaatense
652	AF-A0A0A0M6Q0-F1-model_v4 Chitinase	21	3.431e-05	Lysobacter defluvii IMMIB APB-9 = DSM 18482
653	AF-A0A0A8NWI3-F1-model_v4 Uncharacterized protein	22.9	5.071e-05	Xenorhabdus nematophila str. Websteri
654	AF-A0A2S8ZFW8-F1-model_v4 Peptidase_M23 domain-containing protein	19.8	6.523e-06	Chryseobacterium sp. MYb7
655	AF-A0A7K0DVV4-F1-model_v4 Glyco_hydro_19_cat domain-containing protein	22.4	4.829e-05	Nocardia aurantia
656	AF-A0A107FN43-F1-model_v4 Uncharacterized protein	23.1	0.0001282	Burkholderia ubonensis
657	AF-G1VIN7-F1-model_v4 Uncharacterized protein	22.4	3.268e-05	Prevotella sp. C561
658	AF-A0A7Y0H8X4-F1-model_v4 Uncharacterized protein	22	7.137e-05	Glaciimonas sp.
659	AF-A0A0W0YRP2-F1-model_v4 Uncharacterized protein	18.6	5.916e-06	Legionella shakespearei DSM 23087
660	AF-A0A5C7W4X4-F1-model_v4 Glyco_hydro_19_cat domain-containing protein	19.9	4.171e-05	Ottowia sp.
661	AF-A0A1H7QTQ6-F1-model_v4 Putative chitinase	20.1	0.0001347	Rhodococcus maanshanensis
662	AF-A0A7U5YL47-F1-model_v4 Uncharacterized protein	24.4	4.38e-05	Salmonella enterica subsp. diarizonae serovar 48:i:z
663	AF-E5XQC8-F1-model_v4 Uncharacterized protein	20.5	1.231e-05	Segniliparus rugosus ATCC BAA-974
664	AF-A0A6A5BXB1-F1-model_v4 SH3b domain-containing protein	19	2.005e-05	Naegleria fowleri
665	AF-A0A2K8W0N2-F1-model_v4 Uncharacterized protein	23.2	2.964e-05	Dickeya solani RNS 08.23.3.1.A
666	AF-A0A1L3ZTC9-F1-model_v4 Glyco_hydro_19_cat domain-containing protein	22.9	0.0001719	Tardibacter chloracetimidivorans
667	AF-A0A1G5UCC5-F1-model_v4 Putative chitinase	27.1	4.599e-05	Sphingomonas sp. NFR15
668	AF-A0A3G6R136-F1-model_v4 Peptidase_M23 domain-containing protein	29.2	2.822e-05	Chryseobacterium shandongense
669	AF-A0A291RWC6-F1-model_v4 Glyco_hydro_19_cat domain-containing protein	23.1	7.869e-05	Nocardia terpenica
670	AF-A0A3D9URJ3-F1-model_v4 Putative chitinase	23.4	2.56e-05	Xenorhabdus cabanillasii
671	AF-A0A4R1NF17-F1-model_v4 Putative chitinase	22.5	6.797e-05	Sodalis ligni
672	AF-A0A5C1B466-F1-model_v4 Glycoside hydrolase	19.6	0.0002304	Bosea sp. F3-2
673	AF-A1B8K2-F1-model_v4 Peptidoglycan-binding domain 1 protein	19.1	0.0001485	Paracoccus denitrificans PD1222
674	AF-A0A110AZC3-F1-model_v4 Putative chitinase	18.1	5.071e-05	Mucilaginibacter gotjawali
675	AF-E2CHK7-F1-model_v4 Gene 10 protein	21.3	0.0001005	Roseibium sp. TrichSKD4
676	AF-A0A2G2ATW9-F1-model_v4 EF-hand domain-containing protein	14.9	5.871e-05	Sulfurimonas sp.
677	AF-A0A6L5FPK7-F1-model_v4 Uncharacterized protein	20.3	2.322e-05	Hyphomicrobiales bacterium
678	AF-A0A2N5AE67-F1-model_v4 Peptidase C1	20.5	5.871e-05	Klebsiella variicola
679	AF-A0A420CG58-F1-model_v4 Uncharacterized protein (TIGR02594 family)	17.7	1.292e-05	Chryseobacterium sp. AG363
680	AF-A0A6C2E0Z7-F1-model_v4 Uncharacterized protein	20.5	5.325e-05	Pseudanabaena sp. UWO310
681	AF-A0A0A4ADK1-F1-model_v4 Glycoside hydrolase	20.2	4.829e-05	Erwinia typographi
682	AF-A0A1G6M265-F1-model_v4 Putative chitinase	20	6.165e-05	Sphingomonas sp. YR710
683	AF-A0A7D6E0C4-F1-model_v4 M15 family metallopeptidase	18.2	0.0001282	Mycobacterium gordonae
684	AF-A0A659LE29-F1-model_v4 Uncharacterized protein	26.9	5.871e-05	Escherichia sp. E2586
685	AF-A0A3A1WDF6-F1-model_v4 Glycoside hydrolase family 19 protein	21.6	1.172e-05	Acidovorax cavernicola
686	AF-A0A6I4WUY6-F1-model_v4 Glyco_hydro_19_cat domain-containing protein	21.8	9.567e-05	Rhodococcus rhodochrous
687	AF-A0A813NGZ8-F1-model_v4 Hypothetical protein	19.1	3.603e-05	Adineta ricciae
688	AF-A0A6G9AIZ2-F1-model_v4 Uncharacterized protein	16	2.56e-05	Spirosoma aureum
689	AF-A0A2W6F323-F1-model_v4 Uncharacterized protein	21	7.869e-05	Pseudonocardiales bacterium
690	AF-A0A5F1UIG0-F1-model_v4 Chitinase	19.2	9.111e-05	Escherichia coli
691	AF-A0A162Y446-F1-model_v4 Uncharacterized protein	21.4	0.0002304	Aquimarina aggregata
692	AF-A0A3G8M9H7-F1-model_v4 Uncharacterized protein	21.8	0.0001895	Methylocystis rosea
693	AF-A0A246GEZ6-F1-model_v4 Uncharacterized protein	21.2	2.106e-05	Flavobacterium columnare
694	AF-A0A6C2D4A5-F1-model_v4 Glycoside hydrolase family 19 protein	23.8	8.263e-05	Zoogloea oleivorans
695	AF-A0A4P6H3I9-F1-model_v4 Uncharacterized protein	19.3	3.268e-05	Mesorhizobium sp. Pch-S
696	AF-A0A0K1E680-F1-model_v4 Uncharacterized protein	19.8	0.0001221	Chondromyces crocatus
697	AF-A0A1S7TA89-F1-model_v4 Peptidoglycan-binding domain-containing protein	23.2	7.494e-05	Agrobacterium fabacearum CFBP 5771
698	AF-A0A848L6Y9-F1-model_v4 LysM peptidoglycan-binding domain-containing protein	21.1	2.964e-05	Pyxidicoccus fallax
699	AF-A0A1Y2SJI6-F1-model_v4 Triacylglycerol lipase	21.7	0.0001005	Xenorhabdus vietnamensis
700	AF-A0A009F2I3-F1-model_v4 Chitinase class I family protein	19.9	0.000209	Acinetobacter baumannii 348935
701	AF-A0A0N1BGC7-F1-model_v4 Glyco_hydro_19_cat domain-containing protein	19.2	4.599e-05	Blastomonas sp. AAP25
702	AF-A0A0D5A628-F1-model_v4 Phage endolysin	18.3	0.0001485	Rhodococcus sp. B7740
703	AF-A0A813UZ72-F1-model_v4 Hypothetical protein	19.7	0.0001347	Adineta ricciae
704	AF-A0A1I3IQ90-F1-model_v4 Uncharacterized protein	20.5	2.322e-05	Halpernia frigidisoli
705	AF-A0A3N5LHL6-F1-model_v4 Chitinase	19	2.56e-05	Ignavibacteriae bacterium
706	AF-A1B829-F1-model_v4 Peptidoglycan-binding domain 1 protein	19.1	0.0001282	Paracoccus denitrificans PD1222
707	AF-A0A814F7X5-F1-model_v4 Hypothetical protein	20	6.165e-05	Adineta ricciae
708	AF-A0A816Y303-F1-model_v4 Hypothetical protein	21.4	0.0001055	Rotaria magnacalcarata
709	AF-A0A2A2E430-F1-model_v4 Uncharacterized protein	19.9	0.0002194	Pseudomonas sp. PIC25
710	AF-A0A2N5JRY8-F1-model_v4 Chitinase	18.5	0.0001805	Cyanobacteria bacterium M5B4
711	AF-A0A820A9W3-F1-model_v4 Hypothetical protein	21.2	0.0001347	Rotaria magnacalcarata
712	AF-A0A2N3HRE8-F1-model_v4 Uncharacterized protein	17.3	0.0002194	Labilibaculum manganireducens
713	AF-A0A1G8IEF5-F1-model_v4 Predicted chitinase	17	0.0001559	Pseudomonas panipatensis
714	AF-A0A4Q2ZPD2-F1-model_v4 DUF4280 domain-containing protein	19.3	1.571e-05	Sphingobacteriales bacterium
715	AF-N6VJK2-F1-model_v4 Uncharacterized protein	24.7	9.567e-05	Bartonella vinsonii subsp. berkhoffii str. Tweed
716	AF-A0A7Y7NM63-F1-model_v4 Glycoside hydrolase	19.7	0.000199	Geobacteraceae bacterium
717	AF-A0A4U8SCF5-F1-model_v4 Uncharacterized protein	20.8	5.871e-05	Helicobacter sp. MIT 05-5294
718	AF-A0A4P6FHZ6-F1-model_v4 Glycoside hydrolase	20.1	3.268e-05	Sphingosinicella sp. BN140058
719	AF-A0A547Q6C0-F1-model_v4 Glycoside hydrolase family 19 protein	23.6	5.591e-05	Paenimaribius caenipelagi
720	AF-A0A009KM83-F1-model_v4 Chitinase class I family protein	19.1	1.571e-05	Acinetobacter baumannii 146457
721	AF-A0A7S9NFX5-F1-model_v4 Uncharacterized protein	19.7	1.292e-05	Campylobacter concisus
722	AF-A0A840WWV7-F1-model_v4 Putative chitinase	19.8	3.431e-05	Sphingomonas sp. R3G7C
723	AF-A0A285XCQ1-F1-model_v4 Putative chitinase	20.3	0.0001559	Ensifer adhaerens
724	AF-F3B087-F1-model_v4 Uncharacterized protein	26.4	2.322e-05	Lachnospiraceae oral taxon 107 str. F0167
725	AF-A0A3N0UDN0-F1-model_v4 Uncharacterized protein	24	0.000199	Lonsdalea populi
726	AF-E8V8T8-F1-model_v4 Glycoside hydrolase family 19	19.4	3.603e-05	Terriglobus saanensis SP1PR4
727	AF-A0A7W6H9C9-F1-model_v4 Putative chitinase	23	0.0001637	Aurantimonas endophytica
728	AF-A0A2U3N492-F1-model_v4 Chitinase class I	21.9	0.0001221	Acinetobacter stercoris
729	AF-B0VVF0-F1-model_v4 Glyco_hydro_19_cat domain-containing protein	22.2	0.0002419	Acinetobacter baumannii SDF
730	AF-A0A7G1KTC2-F1-model_v4 Glyco_hydro_19_cat domain-containing protein	21.9	5.325e-05	Nocardia wallacei
731	AF-A0A814RWY9-F1-model_v4 Hypothetical protein	20.2	0.0001282	Adineta ricciae
732	AF-T5LSC8-F1-model_v4 Uncharacterized protein	19.1	6.165e-05	Helicobacter bilis ATCC 43879
733	AF-I4VWR8-F1-model_v4 Peptidoglycan binding domain/papain family cysteine protease	20.4	0.0001163	Rhodanobacter spathiphylli B39
734	AF-A0A4Q9XNV5-F1-model_v4 PG_binding_1 domain-containing protein	12.8	0.000414	Bowmanella sp. JS7-9
735	AF-A0A8B3IP40-F1-model_v4 Peptidoglycan-binding protein	18.5	0.0001559	Brucella anthropi
736	AF-A0A7T8U7Y3-F1-model_v4 Uncharacterized protein	21.9	5.325e-05	Chryseobacterium indologenes
737	AF-A0A172XU88-F1-model_v4 Uncharacterized protein	18.1	0.0003575	Chryseobacterium glaciei
738	AF-A0A828S2D7-F1-model_v4 Chitinase class I family protein	19.8	0.0001485	Escherichia coli STEC_7v
739	AF-A0A418N584-F1-model_v4 Fibronectin type-III domain-containing protein	19.1	3.268e-05	Muricauda aequoris
740	AF-A0A5S9SAJ0-F1-model_v4 Uncharacterized protein	19.3	0.0001805	Tenacibaculum maritimum
741	AF-F7XBP7-F1-model_v4 Chitinase-like protein	21.1	0.0001055	Sinorhizobium meliloti SM11
742	AF-A0A5C7YJZ2-F1-model_v4 Uncharacterized protein	18.4	0.0001719	Mycolicibacterium mageritense
743	AF-A0A815PJ33-F1-model_v4 Hypothetical protein	19.9	7.494e-05	Adineta steineri
744	AF-A0A0N1FH71-F1-model_v4 Glyco_hydro_19_cat domain-containing protein	17.5	0.0001005	Bosea vaviloviae
745	AF-J4K9Y2-F1-model_v4 Cell wall-binding repeat protein	23.7	2.322e-05	Lachnoanaerobaculum sp. ICM7
746	AF-A0A816QIX4-F1-model_v4 Hypothetical protein	21.4	0.0001895	Rotaria magnacalcarata
747	AF-A0A1U9KQE6-F1-model_v4 Lysozyme	21.6	1.732e-05	Neoasaia chiangmaiensis
748	AF-A0A1B9L3G3-F1-model_v4 Glyco_hydro_19_cat domain-containing protein	22.4	0.0001108	Gilliamella apicola
749	AF-A0A818JJA9-F1-model_v4 Hypothetical protein	21.8	0.000199	Rotaria socialis
750	AF-A0A7Y7V7U8-F1-model_v4 Uncharacterized protein	17.5	7.869e-05	Pseudomonas edaphica
751	AF-A0A2Z5V6X8-F1-model_v4 Chitinase class I family protein	21.6	0.0001221	Candidatus Rickettsiella viridis
752	AF-A0A244E2Q8-F1-model_v4 Uncharacterized protein	19.5	0.0003575	Variovorax sp. JS1663
753	AF-A0A5M8PAE1-F1-model_v4 Peptidoglycan-binding protein	23.4	0.0002304	Candidatus Tokpelaia sp.
754	AF-A0A135P869-F1-model_v4 Uncharacterized protein	20.4	6.473e-05	Agrobacterium bohemicum
755	AF-A0A3M1C0M8-F1-model_v4 Glyco_hydro_19_cat domain-containing protein	21.4	4.38e-05	Bacteroidetes bacterium
756	AF-A0A3N7ZY30-F1-model_v4 Uncharacterized protein	18.5	0.0003243	Burkholderia sp. Bp9131
757	AF-A8YDG4-F1-model_v4 Genome sequencing data, contig C292	22.6	5.071e-05	Microcystis aeruginosa PCC 7806
758	AF-A0A258ZJH5-F1-model_v4 Uncharacterized protein	18.4	5.325e-05	Gallionellales bacterium 24-53-125
759	AF-A0A7G2TII5-F1-model_v4 Peptidoglycan-binding protein	19.7	0.0002194	Salipiger sp.
760	AF-A0A4U1HDF6-F1-model_v4 Glyco_hydro_19_cat domain-containing protein	21.4	7.869e-05	Trinickia sp. 7GSK02
761	AF-A0A7W6E9D7-F1-model_v4 Putative chitinase	21.3	0.0001005	Aureimonas pseudogalii
762	AF-A0A1Q4SLJ9-F1-model_v4 Peptidase_C39_2 domain-containing protein	18.3	0.0002304	Mycobacterium sp. SWH-M5
763	AF-A0A432K1F2-F1-model_v4 Uncharacterized protein	22.4	3.431e-05	Bacteroidetes bacterium
764	AF-A0A2G6IIA3-F1-model_v4 Peptidoglycan-binding protein	23.5	0.0004793	Rhodobacterales bacterium
765	AF-A0A7W0G196-F1-model_v4 Uncharacterized protein	17.7	0.0001805	Acidobacteria bacterium
766	AF-A0A7Y6AY97-F1-model_v4 Uncharacterized protein	16.7	0.0001163	Pseudomonas sp. C2B4
767	AF-A0A2K8UQ98-F1-model_v4 Glycoside hydrolase	20.6	0.0005549	Acinetobacter lwoffii
768	AF-A0A5P2QRQ8-F1-model_v4 Peptidoglycan-binding protein	19.5	6.473e-05	Paracoccus yeei
769	AF-B8ITL4-F1-model_v4 Uncharacterized protein	18.6	0.0001005	Methylobacterium nodulans ORS 2060
770	AF-A0A133ZF30-F1-model_v4 Cell wall-binding repeat protein	20	7.869e-05	Lachnoanaerobaculum saburreum
771	AF-A0A553DTW1-F1-model_v4 Uncharacterized protein	20.8	0.0002304	Flavobacterium sp. ZT3R18
772	AF-A0A418WDB1-F1-model_v4 Uncharacterized protein	17.3	0.0004564	Oleomonas cavernae
773	AF-A0A8A9DHM3-F1-model_v4 C39 family peptidase	20.1	0.0001055	Mycobacterium tuberculosis
774	AF-A0A1A9S3Z7-F1-model_v4 Glyco_hydro_19_cat domain-containing protein	24.3	0.0002304	Eikenella sp. NML03-A-027
775	AF-A5FHN3-F1-model_v4 Zoocin A peptidase family M23B	18.5	4.599e-05	Flavobacterium johnsoniae UW101
776	AF-A0A379DT67-F1-model_v4 Predicted chitinase	14	7.137e-05	Pragia fontium
777	AF-A0A365VPU4-F1-model_v4 Chitinase	27.3	8.263e-05	Pseudomonas sp. MWU12-2534b
778	AF-A0A538GR89-F1-model_v4 Uncharacterized protein	17.9	0.0001805	Actinomycetia bacterium
779	AF-A0A816QYB0-F1-model_v4 Hypothetical protein	15.3	9.111e-05	Rotaria magnacalcarata
780	AF-A0A143PL75-F1-model_v4 Putative family GH19 chitinase	20.7	0.0002194	Luteitalea pratensis
781	AF-A0A1G7UVY5-F1-model_v4 Predicted chitinase	21.3	0.0001163	Paraburkholderia phenazinium
782	AF-A0A2T4ZIV9-F1-model_v4 Putative chitinase	20.6	0.0002941	Phreatobacter oligotrophus
783	AF-A0A3D8I9W3-F1-model_v4 Uncharacterized protein	27.3	7.869e-05	Helicobacter didelphidarum
784	AF-A0A838L4L3-F1-model_v4 Glycoside hydrolase family 19 protein	25.1	9.111e-05	Sphingomonas chungangi
785	AF-A0A2D5FT31-F1-model_v4 Peptidoglycan-binding protein	21.7	0.0001282	Oceanicaulis sp.
786	AF-A0A7U1GRE8-F1-model_v4 Uncharacterized protein	22.7	0.0002801	Heyndrickxia vini
787	AF-A0A250KK30-F1-model_v4 Uncharacterized protein	17.5	7.869e-05	Prevotella melaninogenica
788	AF-A0A5J5LX70-F1-model_v4 Peptidase_M15_3 domain-containing protein	21.9	0.0001895	Microcystis aeruginosa EAWAG127a
789	AF-A0A0Q0CEV6-F1-model_v4 EF hand domain protein	25.1	0.0001805	Pseudomonas syringae pv. tomato
790	AF-A0A2V3J417-F1-model_v4 Acidic endochitinase SP2	18	9.567e-05	Gracilariopsis chorda
791	AF-A0A7X5QHQ8-F1-model_v4 Glyco_hydro_19_cat domain-containing protein	40.5	0.0003754	Photorhabdus cinerea
792	AF-A0A1T1ANS5-F1-model_v4 Uncharacterized protein	22	0.0002419	Rhodoferax fermentans
793	AF-A0A814KB02-F1-model_v4 Hypothetical protein	17	5.325e-05	Adineta steineri
794	AF-A0A849VNP2-F1-model_v4 Glycoside hydrolase family 19 protein	22.3	0.0002667	Phyllobacterium pellucidum
795	AF-A0A1A6BJJ9-F1-model_v4 Peptidase_M15_4 domain-containing protein	18.8	0.0006746	Mycobacterium gordonae
796	AF-A0A348HIL9-F1-model_v4 Glycoside hydrolase, family 19	17.6	0.000209	Zymobacter palmae
797	AF-A0A2T4M6D7-F1-model_v4 Uncharacterized protein	22.4	0.0001637	Staphylococcus auricularis
798	AF-A0A814Y1S4-F1-model_v4 Hypothetical protein	21.4	0.0001637	Rotaria sp. Silwood1
799	AF-A0A539DJX9-F1-model_v4 Putative chitinase	17.7	0.0003942	Alphaproteobacteria bacterium
800	AF-A0A2G1B1B8-F1-model_v4 Uncharacterized protein	19	0.000209	Vibrio splendidus
801	AF-A0A5E4W1D3-F1-model_v4 Glyco_hydro_19_cat domain-containing protein	18.3	0.0003243	Pandoraea cepalis
802	AF-A0A6P1VQN1-F1-model_v4 Glyco_hydro_19_cat domain-containing protein	16.1	0.0002801	Spirosoma endbachense
803	AF-A6UIU2-F1-model_v4 Chitinase-like protein	20.9	0.0001282	Sinorhizobium medicae WSM419
804	AF-A0A2N3HTT2-F1-model_v4 Uncharacterized protein	18.7	0.0003754	Labilibaculum filiforme
805	AF-A7ILJ3-F1-model_v4 Glycoside hydrolase, family 19	20.1	0.0003575	Xanthobacter autotrophicus Py2
806	AF-I0R4S1-F1-model_v4 Chitinase class I domain protein	20.9	6.473e-05	Lachnoanaerobaculum saburreum F0468
807	AF-A0A259Y5G5-F1-model_v4 Uncharacterized protein	17.5	0.000254	Rhodococcus sp. 06-621-2
808	AF-A0A542GBM4-F1-model_v4 Putative chitinase	22.5	0.0002667	Microbacterium sp. SLBN-1
809	AF-A0A2E9AMK4-F1-model_v4 EF-hand domain-containing protein	21.3	0.0001895	Salinisphaera sp.
810	AF-A0A2A2GQM1-F1-model_v4 Uncharacterized protein	24.8	0.0003405	Helicobacter sp. TUL
811	AF-D6ZB17-F1-model_v4 Chitinase-like protein	18.2	0.000209	Segniliparus rotundus DSM 44985
812	AF-A0A1H2S9B5-F1-model_v4 Predicted chitinase	19	0.0002194	Albimonas donghaensis
813	AF-A0A815JS44-F1-model_v4 Hypothetical protein	15.5	0.0001637	Rotaria magnacalcarata
814	AF-N9H5U8-F1-model_v4 Glyco_hydro_19_cat domain-containing protein	19.1	0.001706	Acinetobacter lwoffii ATCC 9957 = CIP 70.31
815	AF-A0A2T4TJS8-F1-model_v4 Uncharacterized protein	15.6	0.000209	Prevotella sp. oral taxon 313
816	AF-A0A4R2SPY3-F1-model_v4 Putative chitinase	19.2	0.0001221	Cricetibacter osteomyelitidis
817	AF-A0A191YV54-F1-model_v4 Uncharacterized protein	20.2	0.0004347	Pseudomonas silesiensis
818	AF-A0A3D8VEL7-F1-model_v4 Uncharacterized protein	21.3	0.0003243	Lysobacter soli
819	AF-A0A7U0YBD2-F1-model_v4 Uncharacterized protein	42.2	0.0004793	Klebsiella quasipneumoniae
820	AF-A0A1W6E0D5-F1-model_v4 Glyco_hydro_19_cat domain-containing protein	18.7	0.0004564	Fibrella sp. ES10-3-2-2
821	AF-A0A1B9M7W4-F1-model_v4 Glyco_hydro_19_cat domain-containing protein	22.4	0.0005284	Gilliamella apicola
822	AF-A0A0N0V0H1-F1-model_v4 Peptidoglycan-binding protein	14.1	0.0006746	Candidatus Magnetomorum sp. HK-1
823	AF-A0A817EZ17-F1-model_v4 Hypothetical protein	16.1	0.0002801	Rotaria sp. Silwood2
824	AF-A0A7G7ETT1-F1-model_v4 Glyco_hydro_19_cat domain-containing protein	19	0.0002304	Aeromonas jandaei
825	AF-A0A0D6AWQ0-F1-model_v4 Phage endolysin	19.1	0.0002667	Geminocystis sp. NIES-3709
826	AF-A0A1B0ZP20-F1-model_v4 Peptidoglycan-binding protein	18.7	0.0006746	Phaeobacter gallaeciensis
827	AF-A0A819NU12-F1-model_v4 Hypothetical protein	15.7	0.0002941	Rotaria sp. Silwood2
828	AF-A0A2U9U0E8-F1-model_v4 Uncharacterized protein	18.6	0.0005284	Methylobacterium sp. XJLW
829	AF-A0A8B2BSX0-F1-model_v4 Uncharacterized protein	19.5	0.0002194	Prevotella melaninogenica
830	AF-A0A1G4VFR2-F1-model_v4 Predicted chitinase	19	0.000414	Mycolicibacterium fluoranthenivorans
831	AF-A3IWZ0-F1-model_v4 Lysozyme, putative	25.1	0.0001005	Crocosphaera chwakensis CCY0110
832	AF-A0A250KLN4-F1-model_v4 Uncharacterized protein	18.3	0.000254	Prevotella melaninogenica
833	AF-A0A1E4Q6W7-F1-model_v4 Glyco_hydro_19_cat domain-containing protein	18.9	0.0003575	Rhodanobacter sp. SCN 68-63
834	AF-A0A3N0WNJ5-F1-model_v4 Glyco_hydro_19_cat domain-containing protein	19.4	9.567e-05	Chryseobacterium sp. G0240
835	AF-A0A2C9AR95-F1-model_v4 Predicted chitinase	18.5	0.0009969	Burkholderia sp. YR290
836	AF-A0A7C4VE81-F1-model_v4 Uncharacterized protein	25.3	0.000209	Proteobacteria bacterium
837	AF-A0A0P9G2T3-F1-model_v4 Endopeptidase	21	0.001099	Paenibacillus sp. A3
838	AF-A0A814HII2-F1-model_v4 Hypothetical protein	18.1	0.0003405	Adineta ricciae
839	AF-A0A0P7ENS9-F1-model_v4 Uncharacterized protein	19.7	0.0004347	Vibrio alginolyticus
840	AF-A0A1S8LDW0-F1-model_v4 N-acetylmuramoyl-L-alanine amidase CwlA	18.6	0.0003575	Clostridium felsineum
841	AF-A0A2Z6UTU2-F1-model_v4 Uncharacterized protein	23.2	0.0001347	Microcystis aeruginosa Sj
842	AF-A0A0H4BEX4-F1-model_v4 Uncharacterized protein	18.5	0.0005032	Synechococcus sp. WH 8020
843	AF-A0A3A1WI00-F1-model_v4 Peptidoglycan-binding protein	17.4	0.001706	Aureimonas flava
844	AF-A0A1V3JEL9-F1-model_v4 Uncharacterized protein	20	0.001625	Rodentibacter genomosp. 2
845	AF-A0A484G9X4-F1-model_v4 Glyco_hydro_19_cat domain-containing protein	22.8	0.001047	Candidatus Schmidhempelia bombi str. Bimp
846	AF-A0A814KEG6-F1-model_v4 Hypothetical protein	14.9	0.0001559	Rotaria sordida
847	AF-H1ZEB6-F1-model_v4 Uncharacterized protein	18.5	0.0001108	Myroides odoratus DSM 2801
848	AF-A0A858WV28-F1-model_v4 Uncharacterized protein	18.2	0.0006424	Starkeya sp. ORNL1
849	AF-D6Z8B3-F1-model_v4 Glycoside hydrolase family 19	19.1	0.0003405	Segniliparus rotundus DSM 44985
850	AF-A0A653KIA7-F1-model_v4 EF-hand domain-containing protein	17.3	0.0009494	Aeromonas salmonicida
851	AF-B6VN61-F1-model_v4 Chitinase class i family protein	37.3	0.003912	Photorhabdus asymbiotica subsp. asymbiotica ATCC 43949
852	AF-A0A7T8YXX9-F1-model_v4 Uncharacterized protein	29.4	0.0005032	Klebsiella pneumoniae
853	AF-A0A158BUG6-F1-model_v4 EF hand domain-containing protein	21.7	0.00082	Caballeronia catudaia
854	AF-A0A2U0WHH3-F1-model_v4 Putative chitinase	20.4	0.0001282	Paraburkholderia sp. OV555
855	AF-A0A1X0D8M1-F1-model_v4 Peptidase_C39_2 domain-containing protein	17	0.001273	Mycolicibacterium insubricum
856	AF-A0A0P9PSX5-F1-model_v4 Uncharacterized protein	18.5	0.0009042	Pseudomonas syringae pv. delphinii
857	AF-A0A519KV85-F1-model_v4 Glycoside hydrolase family 19 protein	16.5	0.0003575	Brevundimonas sp.
858	AF-A0A327NRP3-F1-model_v4 Uncharacterized protein	19.8	1.649e-05	Spirosoma telluris
859	AF-A0A419TRX3-F1-model_v4 Putative chitinase	16.2	0.0009494	Collimonas fungivorans
860	AF-A0A7W8LHA3-F1-model_v4 Putative chitinase	20.9	0.0009042	Paraburkholderia sp. HC6.4b
861	AF-A0A6P2ZV10-F1-model_v4 Calcium-binding protein	22.4	0.00082	Burkholderia contaminans
862	AF-A0A844WU65-F1-model_v4 Uncharacterized protein	23.5	0.001706	Gilliamella sp. Pas-s27
863	AF-A0A8B2C520-F1-model_v4 Peptidoglycan DD-metalloendopeptidase family protein	16.7	0.0005284	Prevotella jejuni
864	AF-A0A814ZZB6-F1-model_v4 Hypothetical protein	15.7	0.000254	Rotaria sp. Silwood1
865	AF-A0A3D3MGG6-F1-model_v4 Uncharacterized protein	19	0.001273	Chryseobacterium sp.
866	AF-A0A6J4QT41-F1-model_v4 GH19	19.5	0.001881	uncultured Rubrobacteraceae bacterium
867	AF-A0A2E3FA46-F1-model_v4 Peptidoglycan-binding protein	32	0.001336	Rhodobacteraceae bacterium
868	AF-A0A7D7VSC2-F1-model_v4 Uncharacterized protein	26.9	0.001099	Flavobacteriaceae bacterium
869	AF-A0A7R7ZD40-F1-model_v4 EF-hand domain-containing protein	19.5	0.001706	Aeromonas caviae
870	AF-A0A1V3JFM4-F1-model_v4 Uncharacterized protein	35.3	0.001403	Rodentibacter myodis
871	AF-A0A7Y3X6G8-F1-model_v4 Chitinase	21.5	0.0003243	Flavobacterium sp. CLA17
872	AF-A0A815ALY3-F1-model_v4 Hypothetical protein	16.5	0.0004347	Rotaria sp. Silwood1
873	AF-A0A3M7QQS0-F1-model_v4 Chitinase	18.7	0.002401	Brachionus plicatilis
874	AF-A0A2D9KQK3-F1-model_v4 Uncharacterized protein	19.6	0.001975	Rickettsiales bacterium
875	AF-A0A806XLZ8-F1-model_v4 Uncharacterized protein	19.7	0.0007083	Aeromonas hydrophila
876	AF-A0A7Z0L8T1-F1-model_v4 LysM peptidoglycan-binding domain-containing protein	23.8	0.0009042	Gemella palaticanis
877	AF-A0A060BJA6-F1-model_v4 CAZy families CBM50|GH19 protein	17.1	0.009422	uncultured Myxococcus sp.
878	AF-A0A1V3K3H7-F1-model_v4 Uncharacterized protein	17.2	0.0002419	Rodentibacter pneumotropicus
879	AF-A0A818EHB9-F1-model_v4 Hypothetical protein	16	0.0003942	Rotaria sp. Silwood1
880	AF-A0A2W4UNG7-F1-model_v4 Uncharacterized protein	31.2	0.004994	Flavobacteriaceae bacterium
881	AF-A0A4U8S2F5-F1-model_v4 Glycoside hydrolase	36	0.0009494	Helicobacter trogontum
882	AF-A0A839IBS2-F1-model_v4 Uncharacterized protein	21.5	0.001154	Aliivibrio sp. SR45-2
883	AF-A0A0S8ZK03-F1-model_v4 Uncharacterized protein	18	0.002647	Pseudomonas sp. Leaf48
884	AF-A0A4R7PA92-F1-model_v4 Chitinase class I	15.9	0.002074	Panacagrimonas perspica
885	AF-A0A819LNF6-F1-model_v4 Hypothetical protein	18.2	0.0006746	Rotaria sp. Silwood1
886	AF-A0A659LM02-F1-model_v4 Uncharacterized protein	28.9	0.004314	Escherichia sp. E2593
887	AF-A0A380UI88-F1-model_v4 Chitinase	21.6	0.00278	Acinetobacter junii
888	AF-A0A0C1ERX9-F1-model_v4 Uncharacterized protein	17.4	0.0003754	Kaistella jeonii
889	AF-A0A1H4XIM4-F1-model_v4 Putative chitinase	25.7	0.002647	Pseudomonas saponiphila
890	AF-A0A8B1B9M2-F1-model_v4 Uncharacterized protein	22.9	0.00278	Flavobacterium sp. CS20
891	AF-A0A821PUA4-F1-model_v4 Hypothetical protein	15.4	0.0004793	Rotaria socialis
892	AF-A0A2A9KEM7-F1-model_v4 Putative chitinase	14.6	0.0004564	Collimonas sp. PA-H2
893	AF-A0A1I5YMF8-F1-model_v4 Putative chitinase	25.8	0.002286	Pseudarcicella hirudinis
894	AF-A0A2X2X3E7-F1-model_v4 Predicted chitinase	20.2	0.001047	Chryseobacterium jejuense
895	AF-A0A1I5W7M0-F1-model_v4 Predicted chitinase	18.4	0.000781	Pseudarcicella hirudinis
896	AF-A0A817TJ42-F1-model_v4 Hypothetical protein	16.2	0.0005284	Rotaria socialis
897	AF-A0A2A2GQ71-F1-model_v4 Uncharacterized protein	18	0.001154	Helicobacter sp. TUL
898	AF-A0A1Z8SBN4-F1-model_v4 Uncharacterized protein	20.4	0.003379	Planctomycetia bacterium TMED53
899	AF-A0A816KCF6-F1-model_v4 Hypothetical protein	14.1	0.001273	Rotaria magnacalcarata
900	AF-A0A3P3W5I9-F1-model_v4 Uncharacterized protein	21.4	0.0004793	Flavobacterium macacae
901	AF-A0A3A1YCT5-F1-model_v4 Uncharacterized protein	18.5	0.006071	Capnocytophaga canis
902	AF-A0A069QI87-F1-model_v4 Peptidase, M23 family	19.3	0.0003942	Prevotella loescheii DSM 19665 = JCM 12249 = ATCC 15930
903	AF-I7GTM4-F1-model_v4 Uncharacterized protein	29.5	0.001047	Helicobacter cinaedi CCUG 18818 = ATCC BAA-847
904	AF-A0A2T4TJZ7-F1-model_v4 Uncharacterized protein	18.5	0.0005826	Prevotella sp. oral taxon 313
905	AF-A0A6V7CDN3-F1-model_v4 Uncharacterized protein	23.2	0.006071	Xanthomonas hortorum pv. carotae
906	AF-A0A7C2EX51-F1-model_v4 Uncharacterized protein	15.4	0.001881	Blastocatellia bacterium
907	AF-A0A7W3FJL2-F1-model_v4 Peptidoglycan DD-metalloendopeptidase family protein	21.1	0.002401	Stenotrophomonas tumulicola
908	AF-A0A521QNZ5-F1-model_v4 Uncharacterized protein	16.2	0.001273	Reyranella sp.
909	AF-A0A7Y5LNG7-F1-model_v4 Glyco_hydro_19_cat domain-containing protein	18.2	0.005507	Myxococcales bacterium
910	AF-A0A522MSW4-F1-model_v4 Uncharacterized protein	17.1	0.001154	Paraburkholderia sp.
911	AF-A0A1Q2LFI1-F1-model_v4 Uncharacterized protein	17.4	0.0009042	Helicobacter bilis
912	AF-A0A511F6Q1-F1-model_v4 Chitinase	15.4	0.002919	Methylorubrum extorquens
913	AF-A0A839VRP1-F1-model_v4 Hydroxyethylthiazole kinase	17.7	0.0004793	Herbaspirillum sp. Sphag64
914	AF-A0A0P4V6Z7-F1-model_v4 Glyco_hydro_19_cat domain-containing protein	16.5	0.004314	Leptolyngbya sp. NIES-2104
915	AF-B1FQZ7-F1-model_v4 Uncharacterized protein	21	0.001706	Burkholderia ambifaria IOP40-10
916	AF-A0A376EMZ3-F1-model_v4 Predicted chitinase	17.8	0.005507	Chryseobacterium carnipullorum
917	AF-A0A7X1FHY4-F1-model_v4 Glycoside hydrolase family 19 protein	33.3	0.009422	Pseudomonas sp. MSSRFD41
918	AF-A0A2R7N6W0-F1-model_v4 Uncharacterized protein	19.3	0.009422	Chryseobacterium sp. HMWF028
919	AF-A0A211ZQA2-F1-model_v4 Uncharacterized protein	16.5	0.01263	Inquilinus limosus
920	AF-A0A2T9Y5E9-F1-model_v4 Glyco_hydro_19_cat domain-containing protein	19.1	0.001547	Smittium simulii
921	AF-A0A0U3SWJ5-F1-model_v4 Putative endochitinase 3	17.8	0.006694	Tachinaephagus zealandicus
922	AF-A0A817UUW6-F1-model_v4 Hypothetical protein	16.2	0.002286	Rotaria socialis
923	AF-A0A1I5YXZ1-F1-model_v4 Uncharacterized protein	24.4	0.001791	Pseudarcicella hirudinis
924	AF-A0A3C0GJM5-F1-model_v4 Glyco_hydro_19_cat domain-containing protein	16.8	0.002919	Maribacter sp.
925	AF-A0A846HPU2-F1-model_v4 Uncharacterized protein	15.5	0.005507	Hassallia byssoidea VB512170
926	AF-A0A2T9ZAJ8-F1-model_v4 Glyco_hydro_19_cat domain-containing protein	17.2	0.00453	Smittium megazygosporum
927	AF-A0A562FNF0-F1-model_v4 Uncharacterized protein	16.1	0.002286	Aminobacter sp. J15
928	AF-A0A851H659-F1-model_v4 Uncharacterized protein	17.4	0.00278	Aquitalea sp. LB_tupeE
929	AF-A0A443RY97-F1-model_v4 Glyco_hydro_19_cat domain-containing protein	19.8	0.004756	Leptotrombidium deliense
930	AF-A0A820SE06-F1-model_v4 Hypothetical protein	25	0.01393	Rotaria socialis
931	AF-A0A2B7ZMX4-F1-model_v4 Uncharacterized protein	25	0.01203	Candidatus Nephrothrix sp. EaCA
932	AF-A0A1D1VPG4-F1-model_v4 Uncharacterized protein	16.2	0.004756	Ramazzottius varieornatus
933	AF-A0A2N7QV02-F1-model_v4 Uncharacterized protein	17.1	0.005507	Dyella sp. AD56
934	AF-A0A511Q3S9-F1-model_v4 Chitinase	13.4	0.005507	Sphingomonas aquatilis NBRC 16722
935	AF-A0A817ZY93-F1-model_v4 Hypothetical protein	25.8	0.006694	Rotaria socialis
936	AF-A0A814H2K5-F1-model_v4 Hypothetical protein	19.4	0.007381	Brachionus calyciflorus
937	AF-A0A223NX21-F1-model_v4 Chitinase	14.2	0.03042	Mucilaginibacter xinganensis
938	AF-A0A6A7RW67-F1-model_v4 Uncharacterized protein	19.8	0.03883	Candidatus Accumulibacter phosphatis
939	AF-A0A3C0AX61-F1-model_v4 Uncharacterized protein	16.7	0.008545	Flavobacterium sp.
940	AF-A0A443Q798-F1-model_v4 Glyco_hydro_19_cat domain-containing protein	17.2	0.005507	Dinothrombium tinctorium
941	AF-A0A5C7P5Z3-F1-model_v4 Uncharacterized protein	17.4	0.002178	Desulfurellales bacterium
942	AF-Q92UB6-F1-model_v4 Putative glycoside hydrolase	28.1	0.01462	Sinorhizobium meliloti 1021
943	AF-A0A1C3XH69-F1-model_v4 Uncharacterized protein	18	0.01091	Bradyrhizobium shewense
944	AF-A0A7D7ZX30-F1-model_v4 Glyco_hydro_19_cat domain-containing protein	29.8	0.01263	Flavobacteriaceae bacterium
945	AF-A0A059ENZ3-F1-model_v4 Glyco_hydro_19_cat domain-containing protein	14.4	0.009894	Anncaliia algerae PRA109
946	AF-A0A1D1VYW9-F1-model_v4 Glyco_hydro_19_cat domain-containing protein	14.9	0.01693	Ramazzottius varieornatus
947	AF-A6NY60-F1-model_v4 Putative peptidoglycan binding domain protein	15.4	0.009422	Pseudoflavonifractor capillosus ATCC 29799
948	AF-A0A1D2N1Y0-F1-model_v4 Fibroblast growth factor receptor	19	0.007381	Orchesella cincta
949	AF-A0A3S3P3P2-F1-model_v4 Glyco_hydro_19_cat domain-containing protein	18.4	0.01091	Dinothrombium tinctorium
950	AF-A0A7W6ICU4-F1-model_v4 Putative chitinase	16.7	0.01612	Microvirga flocculans
951	AF-A0A3A9IVM8-F1-model_v4 DUF4280 domain-containing protein	15.9	0.01263	Anaerotruncus sp. 1XD22-93
952	AF-A0A2B8A0M4-F1-model_v4 Uncharacterized protein	26.2	0.03521	Candidatus Nephrothrix sp. EaCA
953	AF-A0A256A0E5-F1-model_v4 Uncharacterized protein	17.5	0.01867	Flavobacterium aurantiibacter
954	AF-A0A6J0M4Y4-F1-model_v4 structural maintenance of chromosomes protein 3-like	15.6	0.01326	Raphanus sativus
955	AF-A0A375I2Q7-F1-model_v4 Chitinase	12.3	0.03194	Propionibacterium ruminifibrarum
956	AF-A0A5B8YLA5-F1-model_v4 Core-binding (CB) domain-containing protein	24.5	0.01778	Antarcticibacterium arcticum
957	AF-A0A846A811-F1-model_v4 S8 family serine peptidase	14.1	0.01263	Leptolyngbya sp. SIO4C5
958	AF-A0A437AQH0-F1-model_v4 Endochitinase	14.6	0.02383	Tubulinosema ratisbonensis
959	AF-A0A2S1LK33-F1-model_v4 Uncharacterized protein	15	0.00775	Flavobacterium kingsejongi
960	AF-A0A1D2MHY3-F1-model_v4 Metalloendopeptidase	17.3	0.0196	Orchesella cincta
961	AF-A0A443S307-F1-model_v4 Glyco_hydro_19_cat domain-containing protein	16.2	0.02383	Leptotrombidium deliense
962	AF-A0A2D5AIF7-F1-model_v4 Uncharacterized protein	15.2	0.02502	Verrucomicrobiales bacterium
963	AF-A0A4Q9LJ66-F1-model_v4 Putative chitinase	17.3	0.01778	Hamiltosporidium magnivora
964	AF-A0A4U8S2I0-F1-model_v4 Uncharacterized protein	30.9	0.09818	Helicobacter trogontum
965	AF-A0A1J5WNL5-F1-model_v4 Endochitinase	18.3	0.02058	Amphiamblys sp. WSBS2006
966	AF-A0A2E8A917-F1-model_v4 Uncharacterized protein	16.5	0.02161	Marinobacter sp.
967	AF-A0A814L726-F1-model_v4 Hypothetical protein	18.5	0.01867	Didymodactylos carnosus
968	AF-A0A2T9ZAE4-F1-model_v4 Glyco_hydro_19_cat domain-containing protein	16.6	0.0196	Smittium megazygosporum
969	AF-L1P4X3-F1-model_v4 Uncharacterized protein	16.7	0.02759	Capnocytophaga sp. oral taxon 332 str. F0381
970	AF-A0A1R0GP95-F1-model_v4 Endochitinase PR4	14.5	0.03194	Smittium mucronatum
971	AF-A0A3M7Q777-F1-model_v4 Chitinase 4-like	16.4	0.0472	Brachionus plicatilis
972	AF-A0A6D2GAN9-F1-model_v4 Predicted chitinase	14.9	0.00775	Salmonella enterica subsp. salamae
973	AF-A0A2G5BL59-F1-model_v4 Lysozyme-like protein	15.9	0.02058	Coemansia reversa NRRL 1564
974	AF-A0A7J9CLG7-F1-model_v4 Chitin-binding type-1 domain-containing protein	14.4	0.01535	Gossypium gossypioides
975	AF-A0A3E0C4S4-F1-model_v4 Putative chitinase	13.8	0.03698	Paraburkholderia sp. BL6669N2
976	AF-A0A1H2ZVF6-F1-model_v4 Predicted chitinase	17.5	0.02383	Capnocytophaga granulosa
977	AF-A0A1Z9VEL6-F1-model_v4 Uncharacterized protein	14.2	0.01091	Gammaproteobacteria bacterium TMED281
978	AF-B0XK59-F1-model_v4 Basic endochitinase CHB4	17.4	0.1137	Culex quinquefasciatus
979	AF-A0A659AS86-F1-model_v4 Uncharacterized protein	16.8	0.02759	Vibrio parahaemolyticus
980	AF-A0A512J235-F1-model_v4 Uncharacterized protein	12.6	0.1316	Methylobacterium oxalidis
981	AF-A0A250F2N9-F1-model_v4 Uncharacterized protein	15.5	0.03042	Capnocytophaga sputigena
982	AF-A0A0R0M0W5-F1-model_v4 Putative chitinase	16.3	0.06643	Pseudoloma neurophilia
983	AF-A0A2D4BNH4-F1-model_v4 Uncharacterized protein	14.9	0.2145	Pythium insidiosum
984	AF-A0A2N3I860-F1-model_v4 Uncharacterized protein	14.3	0.16	Raineya orbicola
985	AF-A0A0M4PV89-F1-model_v4 Uncharacterized protein	15	0.2483	Pseudonocardia sp. AL041005-10
986	AF-A0A814PZA7-F1-model_v4 Hypothetical protein	17.7	0.1852	Brachionus calyciflorus
987	AF-A0A349DNN6-F1-model_v4 Uncharacterized protein	14.8	0.02759	Microscillaceae bacterium
988	AF-A0A437AM80-F1-model_v4 Endochitinase	15	0.168	Tubulinosema ratisbonensis
989	AF-A1ZH11-F1-model_v4 Uncharacterized protein	16.4	0.05204	Microscilla marina ATCC 23134
990	AF-A0A423XPF7-F1-model_v4 Uncharacterized protein	10.7	0.3169	Cytospora leucostoma
991	AF-A0A2H9TFJ6-F1-model_v4 Uncharacterized protein	19.3	0.04495	Paramicrosporidium saccamoebae
992	AF-R0MMH7-F1-model_v4 Acidic endochitinase SP2	17.2	0.16	Nosema bombycis CQ1
993	AF-A0A7W5WSN6-F1-model_v4 Putative chitinase	27.3	1.667	Rhizobium sp. BK393
994	AF-A0A0G2FKG1-F1-model_v4 Uncharacterized protein	10.1	0.4248	Diaporthe ampelina
995	AF-R1CQG6-F1-model_v4 Uncharacterized protein	11.9	0.1524	Emiliania huxleyi
996	AF-A0A1V3JU95-F1-model_v4 Uncharacterized protein	22.7	1.185	Rodentibacter sp. Ppn85
997	AF-A0A2P6TDK2-F1-model_v4 Class VII chitinase	16.8	1.93	Chlorella sorokiniana
998	AF-A0A0Q6P000-F1-model_v4 Uncharacterized protein	16.4	0.2875	Devosia sp. Root105
999	AF-A0A1G5ZXP1-F1-model_v4 Uncharacterized protein	16.9	0.2607	Sinorhizobium sp. NFACC03
1000	AF-A1ZW01-F1-model_v4 Uncharacterized protein	16.9	0.598	Microscilla marina ATCC 23134
